# Supplementary material for: Distribution and Functions of Monodehydroascorbate Reductases in Plants: Comprehensive Reverse Genetic Analysis of Arabidopsis thaliana Enzymes
Source: Antioxidants (Basel). 2021 Oct 29;10(11):1726. doi: 10.3390/antiox10111726 (PMC8615211; doi:10.3390/antiox10111726)
Supplement: Supplementary file 1 [file antioxidants-10-01726-s001.zip › Tanaka_Supplemental_Tables_revised.xlsx]

## Sheet: Table S1
	Table S1. List of primers used
	Primer	Sequence	Use	Figure
	MDAR1-F	5’-AAGTACATCATCCTCGGCGG -3’	semi-quantitative RT-PCR	6B, S4B
	MDAR1-R	5’-TCAGATCTTAGCTGCG -3’	semi-quantitative RT-PCR	S4B
	MDAR1-R2	5'- GCTGCGAAGGAAATTCCTTG -3'	semi-quantitative RT-PCR	6B
	MDAR2-F	5’-ATGGCAGAAGAAAAGAGCTTCAAGTATG -3’	semi-quantitative RT-PCR	S4B, S14A
	MDAR2-R	5’-TTATATATTTGTGGCGAAGGAAAGGC -3’	semi-quantitative RT-PCR	S4B, S14A
	MDAR3-F	5’-ATGGCGGAAGAGAAAAGC -3’	semi-quantitative RT-PCR	S4B, S14A
	MDAR3-R	5’-TCAAAGAGAGGTGCTATAGAAC -3’	semi-quantitative RT-PCR	S4B, S14A
	MDAR4-F	5’-GAAACCATGGGAAGAGCTTT -3’	semi-quantitative RT-PCR	S4B, S8B
	MDAR4-R	5’- TCACCATCTACGGCGTCTC-3’	semi-quantitative RT-PCR	S4B, S8B
	MDAR5-F	5’- ATGTCTGCAGTTCGTAGAGTC-3’	semi-quantitative RT-PCR	S4B
	MDAR5-R	5’-CTAACTCTGTAGAGCGGC -3’	semi-quantitative RT-PCR	S4B
	DHAR1 F	5’- CACTGGTGGGTGGAGAATGG -3’	semi-quantitative RT-PCR	S14A
	DHAR1 R	5’- AGGGTTAACCTTGGGAGC -3’	semi-quantitative RT-PCR	S14A
	DHAR2 F	5’- ATGGCTCTAGATATCTGCGTGAAGG -3’	semi-quantitative RT-PCR	S14A
	DHAR2 R	5’- TCACGCATTCACCTTCGATT -3’	semi-quantitative RT-PCR	S14A
	APX3 F	5’-GATTCAAATGTCTGCCCCAAG -3’	semi-quantitative RT-PCR	S8B
	APX3 R	5’-CTGCTGAGGAGTTTGGGTTG -3’	semi-quantitative RT-PCR	S8B
	Actin8 F	5’-GAGCTCCGTATTGCTCCTGA-3’	semi-quantitative RT-PCR	6B, S4B, S8B, S14A
	Actin8 R	5’-GGCAAGAGCTGTGATCTCTT-3’	semi-quantitative RT-PCR	6B, S4B, S8B, S14A
	MDAR1-qF	5’- GAGAAGGGTCGAGCATGTTGAC -3’	qPCR	S3B
	MDAR1-qR	5’- CCGCTTTGATCGCCTTAAC -3’	qPCR	S3B
	MDAR2-qF	5’- CCACCTCGAAAATAAAGCTACAC -3’	qPCR	S3B
	MDAR2-qR	5’- TGCCCAAAATCAGCTCAATA -3’	qPCR	S3B
	MDAR3-qF	5’- TCATTGGAGGTGGTGTAGCC -3’	qPCR	S3B
	MDAR3-qR	5’- ACGCTCAAAAGGAGGCACT -3’	qPCR	S3B
	MDAR4-qF	5’- ATTTCCGAAGAACCCGTTG -3’	qPCR	S3B
	MDAR4-qR	5’- AAAGAAGGAAGCCGTGCAG -3’	qPCR	S3B
	MDAR5-qF	5’- GCAAACACTCACCACAGACG -3’	qPCR	S3B
	MDAR5-qR	5’- CCGATTTTATCTGGGAACCTT -3’	qPCR	S3B
	Actin2-qF	5’- GGTGGTTCCATTCTTGCTTCCC -3’	qPCR	S3B
	Actin2-qR	5’- TCATACTCGGCCTTGGAGATC -3’	qPCR	S3B

## Sheet: Table S2
	Table S2. List of MDAR sequences in plants and algae
	Putative cytosol-specific enzymes are shown in red.
	Clade/Division	Family	Species/ database	No. of genes	Accession No./Transcript name	Gene	A.A.	R320	Y349	PTS1	TMHMM	R/K-rich in C-ter	N extention	Target P 1.1	WoLF PSORT	Class	Seqence
	Chlorophyta	Chlamydomonadaceae	Chlamydomonas reinhardtii v5.5	1	Cre17.g712100.t1.2	CreMDAR	445	Yes	Yes	AKL	No	-	No	Other(0.868)	chlo: 5, cyto: 5, pero: 2, mito: 1	-	MPATYKTVILGGGNASGYAAKAFVEAGIEKDSLAIITEEPFVAYERPALSKGYLLGAARLPGFHTCVGGGGERQAPEWYAEKGITYLTNSRVTKADLASRTLILASGDTVSYSQSLIIATGARAVKLTEFGVPGADLSGIHYLRDVKDAESLVAAVAAAKEASGKAVIVGGGYIGMECAAGLASTGLAGATTIVMPEDRLMARLLTPQLAAVYERLYGDKGVTMVKGAKVTAFTGTDGKVTGVTYTDAAGASHQLDASLVVVGVGARANSDLFTGQLEMAAGGIKVDRMMATSVPGVYAVGDVAAFPLTSVATGQESHVRQEHVTHCRSSAAQAVKAITSTSAPPPAYEYLPFFYSRVFNLSWVFYGEAAADATPVHFGDLNEAKVFGCLWLGAGGRLV…
		Chlorophyceae	Chromochloris zofingiensis v5.2.3.2	1	Cz14g22170.t1	CzoMDAR	436	Yes	Yes	No	No	-	No	Other (0.691)	pero: 13, cyto: 1	-	MAMSTKYVVLGGGNASGYVAKEFAAKGIEKGQLTIITDEPVVAYERPALSKAYLFPEGAARLPGFHTAVGGGGDRQEPGWYSEKGIDYRTNTKVTAVDVKAKLLAFQNGDKLTYDKLIVATGARPVYLTEFKTPGAELEGIHYLRNVSDADKLLAAIKEAKTRGNKAVVIGGGYIGLEVSAGLCLQGLEVTMVFPEPHVMPRLFTPELAAFYEKFYTDKGIKLMEGALANGFEGKDGKVTTVKLNNGQTLEAELVLVGVGARPNIEMFDGQLKTEKGGILVDGTLKSSDPDVYAVGDVATFPLVIEGGSLVRQEHVAHARQSAVHAVNAILGSDAPYDYLPYFYSREFNLSWQFYGVSEGEAVHFGDQGAGKFGAYWVRDGQVVGAFLESGSNDDNAAI…
		Coccomyxaceae	Coccomyxa subellipsoidea C-169 v2.0 proteome	2	22455	CsuMDAR1	429	Yes	Yes	SKL	No	-	No	Other (0.381)	chlo: 9, cyto: 2, mito: 1, extr: 1	-	MSASSFKYVVLGGGNSSGYAAREFVQRGIGNGELAIITEEPYVAYERPALSKAYLFPEGAARLPGFYATVGGGGEKQTPEWYAEKGIDYKTNTSITAVDVSAKTLTAASGDTISYEKLIVATGARPIYLTDFGTEGADLKNIFYLRNVVDADKIVAAIADAKTKSNKATIVGGGYIGMETAACLSKNGLEVTLVFPEKHLMERLFTAEMAAFYEKVYTDKGIKLLPGSLAASFEGKDGHVTTTVLKNGDKIESDIVLVGVGARPNVEMFKGQLDLLEDRPGGIKVDGNLRTSNPDVYAVGDIAAFPLKKYGITTRQEHVANCRASATHAVASIMDPSTGDYDYLPYFYSRIFDLSWQLYGINEMTTPTLFGDTSSGKFGTYFVRDGKVVGAFLKGGSPE…
					33977	CsuMDAR2	429	Yes	Yes	SKL	No	-	No	Other (0.493)	chlo: 11, cyto: 1, mito: 1	-	MSASSFKYVVLGGGNSSGYAAREFVQRGIGKGELAIITEEPYVAYERPALSKAYLFPEGAARLPGFHATVGGGGEKQTPEWYAEKGIDYKTNTSITAVDVSAKTLTAASGDSISYEKLIVATGARPIYLTDFGTKGADLKNIFYLRNVVDADKIVAAIADAKTKSNKATIVGGGYIGMETAACLSKNGLEVTLVFPEKHLMERLFTPEMAAFYEKVYTDKGIKLLPGSLAASFEGKDGHVTTTVLKNGDKIESDIVLVGVGARPNVEMFKGQLDLLEDRPGGIKVDGNLRTSNPDVYAVGDIAAFPLKKYGITTRQEHVANCRASATHAVASIMDTSTGDYDYLPYFYSRIFDLSWQLYGINENTTATLFGDTSSGKFGTYFVRDGKVMGAFLEGGSPE…
		Dunaliellaceae	Dunaliella salina v1.0	1	Dusal.0599s00007.1	DsaMDAR	441	Yes	Yes	SRM	No	-	obscure	Mit (0.541)	chlo: 5, cyto: 5, mito: 4	-	MLLRPIPIQSAVHRFDTRVFNARPWEWRKPVAASRRLVAAMATEHYANVTIGGGNAAGYVAKEFVAQGLGRGELAIISDEGVCAYERPALSKAYLAGEGAARLPGFHTSVGGGGERQTPEWYAEKGITYKLATKVEKVDAKTKSLSTASGNTITYDKLIYAAGSRPVYLSEFKVPGSDLQGLHYLRNTADADKLVQDIQAAKASGGKAVLVGGGYIAMEVASQLANNGVPSTIVCPEPYLLSRLFTPKIAEFYEKFYASKGVHIMKHAKATAFEGSGKVQQVVVSTKDGEQKLDASLVIVGVGARPNVELLDGQVEMVPKPVGGIKEHVTNARQTATQAVRAIKGKTTEPYDYLPFFYSRVFNLSWQFWGTNENAEVAHFGDFAAGKFGAYFISNGKVV…
		Mamiellaceae	Micromonas pusilla CCMP1545 v3.0 proteome	1	181551	MpuMDAR	466	Yes	Yes	No	No	-	No	Mit (0.356)	cyto: 9, chlo: 4	-	MSAIAKKIVLVGGGNAAGYFARAVVAAGRGAELTMIAAENVLPYERPALTKAFLHAESPARLPGFHTSVGGGGERQTAEWYATHGVEVILGTRVVDANLEEKTVVTDAGKSYSYDKLVVAIGCTALKLPSAIGGDLPGVHRVRDVADALALCDAMDGCAKGSVVIGGGYVGLEVAAALATRGLSPRVVMMEPHIMSRLWTREIAEKYEKLYEAKGTTFHRGAKVAKIIAGDDGRAAGVELDGGATLECDVVVVGVGAGAPIEPFARLAAAPAPTGGIAVDGTFAASGEGIEPKSVYAIGDVAAFPLKRAGGALRRVLLHTGPHTTARMEHVAHARASAAHAAKAVLDPSSAETYDYLPYFYSRVFEHAGSERKVAWVFYGAQPEGAEVVVVGELRPKLF…
			Micromonas sp. RCC299 v3.0 proteome	1	61108	MspMDAR	447	Yes	Yes	No	No	-	No	Mit (0.467)	chlo: 12, mito: 2	-	MATRIAKKIVVVGGGNSAGYFARAVVAAGRGADLTVISAEDVLPYERPALTKAFLNETGPARLPGFHTSVGGGGERQNQEWYDANGVEVHLGTRVVSWDAASKTVTTDTSASFGYEKLIVAIGCTALKLPASMGGDLPGVHYVRDHADALALYDAMSKARAPVVIGGGYIGLEAAAAFAARGAKPAVVMMEPHVMARLWTPTIAAHYETLYESKGCVFHKNAKVSAIARGEDGRVESVELEGGVTLPADLVVVGVGAGAVTAPFDALDTTPDARNPGGILVDHTFAASGVNVEPKSVYAIGDVAAFPLAFDDNQTVRMEHVAHARASAAHCARCILAADDDDTQTANAPYRYTPYFYSRVFEQSDSTRKVAWVFYGLQRGDVVCVGDFAPKLAAFWVNE…
		Bathycoccaceae	Ostreococcus lucimarinus v2.0 proteome	1	15314	OluMDAR	456	Yes	Yes	No	No	-	No	Chl (0.604)	chlo: 10, mito: 3	-	MSKPTTSRSPRPAHAASDRSSMSRSIVVVGGGNAAGYLVRALVSADPTLGARTLVIGAEDVAPYERPALTKGFLHKESPPRLPGFHTCVGGGGERQTPEWYEQHGVELRLNTTVTAADFKSRTVTTSAGESIGYETLVLATGCGVIRLPEAIGGTLPGVHYVRNNADGLALVEAMDKATKAVVVGGGYVGLEVAASCATRGLKPEVVMMEPHVMARLWNADIAQHYERLYETRGTTFHRSSKLKAILADADGKARGIELESGAVIDADLVVVGVGATAPVPFTGLDAPEGRVGGIKVDSRFRASGADVAPGSVYAIGDIAAFPLKLADNEIVRMEHVKHARDSATLVGNIIAGKSDDEYDYTPFFYSRVFEHPGTERAVNWVFHGLQRGEIITIGNLDP…
		Volvocaceae	Volvox carteri v2.1	1	Vocar.0005s0459.1	VcaMDAR	443	Yes	Yes	AKL	No	-	No	SP (0.593)	chlo: 9, cyto: 2, pero: 2	-	MSSYKIIFLGGGNAAGYAARAFVENCLKAGELAIITEEPYVAYERPALSKGYLLGAARLPGFHTCVGGGGERQAPEWYSEKGITYLTNSRVVKADLANKALTLASGEVLSYEKLIIGTGARPTRLTEFGVPGADLGGLFYLRDVKDGDVLVAAVAATKEAGGKAVVIGGGYIGMEVAAGLSSSGLSVTMVFPEDRILSRLLTPQLAAVYERLYDAKGIKMVKGAKVTGFDGVDGKVSCVRFTDASGSQQSLDAGLVVVGVGARPNVELFQGQLEIAAGGIKVDGQMATSVPDVYAVGDVAAFPLTSVASGEVSYARQEHVTHCRLSAAQAAKAILGLSPPPYDYLPFFYSRVFALSWVFYGEAPADATAVHFGDMPEAKCFGCLWLGAGGKLVGAFLEG…
	Charophyta	Klebsormidiaceae	Klebsormidium nitens NIES-2285 ver1.0	3	kfl00196_0050_v1.1	KniMDAR1	434	Yes	Yes	AKI	No	-	No	-	-	Class III (cyt/per)	MSSFKYVIVGGGVAGGYGAWEFTKHGLQPGELAIISKEKVAPYERPALSKGYLFPENPARLPGFHTCVGGGGPKGLPEWYKENGIELKLDTEVVKADLKSKTLTTDKGETIKYEKLIIATGAGVINLKDFKMPGADADGIYYIREEEDAAKLYEAMQKHKGAKVIVVGGGYIGCEVGAGLSLNGLDVTIVYPEPHLMPRLFTPEIASFYEGYYEAKGIKVFRGRLAAAIVQHDGQPNKIQCVRMKDGEELPADFLVVGIGARPRVGLFEGQLEMAKGGFKVDGNFKTSEPDVYAVGDVAAFPLKMKDGELTRVEHVDNARKSVMQAVQAIKAEEKGESIPEYDYLPYFYSRVFKLSWVFYGENVGDVVVWGREEAIKEGGKFGAYWVNDKKVVGAFLES…
					kfl00287_0080_v1.1	KniMDAR2	476	Yes	Yes	No	446-468	Yes	No	-	-	Class II (per mem)	MGRAFKFVVLGGGNAAGYAAHEFIKRGIGPGELCIISEEPVAPYERPALSKGYLLPEGAVRLPAFHTCVAIGHERQVRAWYQDHGIELLLNTRVTSADVKKRALTTQSGETITYKTMIVATGARVLRLEEFGVTGADASNICYLRDIRDAAFLVDAMRPGQGMKAVVIGGGYIGMECTAALVANKLDVTMVYPEPHCMARLFTPEIAQFYEDRYRKKGVKFVKGTVMAAFEKSSSGKVAAVILKDGTRLPADLVVVGVGIRANTALFEGQLAIEKGGIKVDSKFRTSVSTVYAVGDVAAFPVKLYGDIRRLEHVDHARKSARHAVSAILSGDTTKDYDYLPFFYSRVFNLSWQFYGDNVGKCVLFGDQSRGKFGAYWIDERNAVVGTFLEGGSSEDYTA…
					kfl00169_0160_v1.1	KniMDAR3	541	Yes	Yes	No	No	-	Yes	SP (0.359)	chlo: 10	Class I (chl/mit)	MSTNLATACLCKISASLEATALCALIEQLTPTAAMAFARCSAAVGQVNLAPKAAFTLRQSSQLGAPLLSVSSFQGVSLTGVLTPHLQSRVSGRRSFSVSASSLNRNTEYVIVGGGNAAGYAAKAFVDNDQAAGKLAIISSEEVAPYERPTLSKGYLFPIKGDAKPPRLPGFHTTVGTGGERQTPEWYEQKGIELLLGTTISGLDLSKKELTTSKGDTLSYKKLIVATGSTASRLPEKIGGALPGVNYIRNVADADGLVKDFQNAKKVVVIGGGYIGMEVSAAALAWGLDVTLIFPEPHFMPRLFTPGIAAHYHKLYESLGANFVTGASVERFEAGPDGRVAKAIASNKQEYDADLIVVGVGAKPAVQLFLDAGLDEEAKGIKVNDQLQSSNPDVYAIGD…
		Charophyceae	Chara braunii	1	CBR_g42037	CbrMDAR	442	Yes	Yes	No	No	-	No	-	-	Class III (cyt/per)	MPPSFKYVILGGGVAAGYAAWEFVLSGLRPGELAIISKEQVAPYERPALSKGYLNPEGPARLPGFHTCVNMGGPAERHGPEWYAQHGITLMLQTEVIGGDLSKKELLTKSKDIIKFEKLIIATGSTAMKLTDFKVPNSDARGIYYLREEADAAILDKAVKKAKGKNAVVLGGGYIGLEIGAALVINGVQTTIVFPEPHCLRRVFTPEIAAVYQTHYDGKGVKFIQAAVVGFVVDNSLNVTGVKLKDGSSLPAAMVVVGVGARPCSYLFPKQLAIEQGGYKVNGRLETSLPDVYAVGDVATFPIKLYGNEMQLQGHVRHARMSGKYVVQSIRAQEECRVIDDYDYVPYFYSRMLDMRWQFFGKNVGDCVVWGLANVTPAGGKFGAYWVMDGKVVGAFLES…
	Anthocerotophyta	Anthocerotaceae	Anthoceros punctatus	3	Apun_evm.model.utg000170l.42.1	ApuMDAR1	439	Yes	Yes	SKI	13-35	-	No	-	-	Class III (cyt/per)	MADAGESQRHYKYVVIGGGVAAGYAAAEFVQLGVNEGELAIFSKEKVAPYERPALSKAYLFPENPARLPGFHTSVGSGGERHPPEWYREHGVQLFLNTEVVKADVAGKSFTLADGRTFTYDTLVVATGATFIRLSDFGVPGADAAGIYYLREVEEADDLYRSIKALPPGGNAVVVGGGYIGLELSAVLTLNKVKVTMVYPEPFCMPRLFTSEIAAFYESYYQAKGVTIIKGTVATGFDVGTDGRVKVVKLKDGRELAADIVVVGVGARPNVGLFKGQLVEEKGGFKVDASFRTSAPDVFAVGDVATFPLKLYGGELRRVEHVDHARKSAQHAVRAILKPEQPAPEYDYLPYFYSRAFSLSWQFYGDNVGDAVLFGQADAASPNAKFGSYWIHQGRVVGA…
					Apun_evm.model.utg000272l.33.1	ApuMDAR2	530	Yes	Yes	No	500-522	Yes	Yes	Other (0.791)	cyto: 6, E.R.: 3, vacu: 2, chlo: 1, nucl: 1, mito: 1	Class II (per mem)	MAWAPDSTSLFTPLQTYEQPLEAECEKDQYKQTSSRPQRKGERGLPGMGRAFKVVILGGGTAAGYAACEFVKLGMGKGDLCIISDESVAPYERPALSKGYLFPEVATRLPAFHTCVGVGQERMVPKWYKDHGVELLLDTPVVAADVKQKTVLTAAGESILYQTLIVAAGARALRLEEFGVKGGDAKNICYLRHVKDAEKLVDTMAACQGGRAVVIGGGYIGMECAAALVRNKIPVTMVFPESHCMARLFTPQIATFYEDYYKRKGVVFIKGTFMTSFECGGDGQVSAVILKDGSRLPANLVVVGIGIRSNTALFEGQLAIEKGGIKVNGKMRTSNSSVYAVGDVAAFPVKMYGDLRHLEHVDHARKSAAHAVHAIMQPDKTQDYDYLPFFYSRVFTLSW…
					Apun_evm.model.utg000272l.153.1	ApuMDAR3	485	Yes	Yes	No	No	-	Yes	Mit (0.675)	cyto: 5, chlo_mito: 5, chlo: 4.5, mito: 4.5	Class I (chl/mit)	MAMAGLRQGMALWSGKPVAKHPSPWQRPAWSCAPWKHQSVVTFAAVANENKEYVIVGGGNAAGYAARAFVENGVAEGKICIVSNEKVPPYERPALTKAYLFPLDKGPARLPGFHTCVGGGGERQTSDWYKEKGIEVLYDTTVSGIDVNSRTLATTSGATIEFGKALIIATGASASRLPDAIGGSLPGVHYIRNVADADNLVTALQSAKKIVVIGGGYIGMEVAAATSAWKLDTTVVFPESHVMPRLFTPTIARHYEELYSRNGIHFAKGRSVNKLIAGDRGKVEGVELSDGTVRDADLVIVGVGAKPAASPFLEAGFLSEGGALLVDGVFGTSFPGIYAIGDVAAFPLKIYGRVTRVEHVDHARKSAAHCVNSLLQNSTTPYDYLPYFYSRVFEFPGSE…
			Anthoceros agrestis Oxford	3	AagrOXF_evm.model.utg000071l.58.1	AagMDAR1	439	Yes	Yes	SKI	13-32	-	No	-	-	Class III (cyt/per)	MADAGESQRHYKYVVIGGGVAAGYAAAEFVQLGVKEGELAIFSKEKVAPYERPALSKAYLFPENPARLPGFHTSVGSGGERHPPEWYQEHGVQLFLNTEVVKADVAGKSFTLADGRTFTYDTLVVATGATFIRLSDFGVPGADAAGIYYLREVEEADDLYRSIKALPPGGNAVVVGGGYIGLELSAVLTLNKVKVTMVYPEPFCMPRLFTSEIAAFYESYYQAKGVTIIKGTVATGFDVGTDGRVKVVKLKDGRELAADIVVVGVGARPNVGLFKGQLVEEKGGFKVDASFRTSAPDVFAVGDVATFPLKLYGGELRRVEHVDHARKSAQHAVRAILKPEQPAPEYDYLPYFYSRAFSLSWQFYGDNVGDAVLFGQADAASPNAKFGSYWIHQGRVVGA…
					AagrOXF_evm.model.utg000081l.349.1	AagMDAR2	483	Yes	Yes	No	453-475	Yes	No	-	-	Class II (per mem)	MGRAFKVVILGGGTAAGYAACEFVKLGMGKGDLCIISDESVAPYERPALSKGYLFPEVATRLPAFHTCVGVGQERMVPKWYKDHGVELLLDTPVVAADVKQKTVLTAAGESILYQTLIVAAGARALRLEEFGVKGGDAKNICYLRHVKDAEKLVDTMAACQGGRAVVIGGGYIGMECAAALVRNKIPVTMVFPESHCMARLFTPQIATFYEDYYKRKGVVFIKGTFMTSFECGEDGQVSAVILKDGSRLPANLVVVGIGIRSNTALFEGQLAIEKGGIKVNGKMRTSNSSVYAVGDVAAFPVKMYGDLRHLEHVDHARKSAAHAVHAIMQPDKTPDYDYLPFFYSRVFTLSWQFFGDNTGDPVFFGEPARGKFGTFWIDKGRLVGAFLEGGSKEEYAAM…
					AagrOXF_evm.model.utg000081l.218.1	AagMDAR3	485	Yes	Yes	No	No	-	Yes	Mit (0.675)	cyto: 6, chlo: 4.5, chlo_mito: 4.5, mito: 3.5	Class I (chl/mit)	MAMAGLRQGMALWSGKPVAKHPSPWQRPAWSCAPWKHQSVVTFAAVANENKEYVIVGGGNAAGYAARAFVENGVAEGKICIVSNEKVPPYERPALTKAYLFPLDKGPARLPGFHTCVGGGGERQTSDWYKEKGIEVLYDTTVSGIDVNSRTLATTSGDTIEFGKALIIATGASASRLPDAIGGSLPGVHYIRNVADADNLVTALQSAKKIVVIGGGYIGMEVAAATSAWKLDTTVVFPESHVMPRLFTPTIARHYEELYSRNGIHFAKGRSVNKLIAGDRGKVEGVELSDGTVLDADLVIVGVGAKPAASPFLEAGFLSEGGALLVDGVFGTSFPGIYAIGDVAAFPLKIYGRVTRVEHVDHARKSAAHCVNSLLQNGTTPYDYLPYFYSRVFEFPGSE…
	Marchantiophyta	Marchantiaceae	Marchantia polymorpha v3.1 proteome	3	Mapoly0001s0099.1	MpoMDAR1	426	Yes	Yes	SNL	No	-	No	-	-	Class III (cyt/per)	MAEKSYKYIILGGGVAAGYAAREFVQQGLQAGELAIISKEPAAPYERPALSKAYLFPESPARLPGFHTCVGSGGERQTPQWYSEKGIDLVLDTEVVEASVAQKSLKTASGDVYKYGALIIATGATFIKLSDFGTPGADAKGIYHLREVEDATALYEAIKANPNGNAVCVGGGYIGLELAAVLNMNKMKVTMVYPEPFCMPRLFVSEIAAFYEGYYKEKGIEIVKGTVASGFESNEHGEVKVVKLKDGRELPADIVIVGVGARPNIGLFKDQLTVEKGGFKVDGFFKTSAENVYAVGDVATFPLKLYNELRRVEHVDHARKSAIQAVQTIKAAEAGTSVEEYDYLPYFYSRAFSLSWQFYGDNVGDAVVWGAKGADKVNAKFGAYWVKDGKVMGAFLEGG…
					Mapoly0006s0270.1	MpoMDAR2	485	Yes	Yes	No	456-478	Yes	No	-	-	Class II (per mem)	MGRSFQVVILGGGTAAGYAALEFVKNDYNHGDLCIISEESVAPYERPALSKGFLLPEGAARLPSFHTCVGTGNERQLTKWYKDHGIELILDTRVVAADVKGHTLRTSSQETIAFRTLIIATGARVLRLEEFGITGSVAPNICYLRSVQDANKLVEAMAACKSIGGSAVVIGGGYIGMECAAALIGNRIPVTMVFPESHIMARLFTPEIAAFYEQYYEKRGVTFKKGTVMSGFERNDQGKVEAVVLKDGSRLPADLVVVGVGIRPNVSLFEGQLTLEKGGIKVNGKMQTSNSSVYAVGDVVSFPLRMYGEMRKLEHVDHARKSAAHAVQAILCPEKIEDYNYMPYFYSRVFTLSWQFFGDNVGSCIHYGVQSSGKFGAYWINKGKLVGAFLEGGSKDEYA…
					Mapoly0057s0016.1	MpoMDAR3	492	Yes	Yes	No	No	-	Yes	Mit (0.641)	chlo: 14	Class I (chl/mit)	MMAGLSRTVFTGGVVAPRTSVLGLFRVSKVAGPVSKCSRVKTLVTSAAQKNTNTEYVIVGGGNAAGYAAKAFVENGAAEGKVCIVAKENVAPYERPALTKAYLFPVDKSPARLPGFHTSVGGGGERQTPDWYKEKGIEVLYGTEVTGLDIDKQSLTTSSGDTISYNKLIIATGCTASRLPEKIGGSLRGVHYIRDVADADQLVAALQSAKKVVVIGGGYIGLEVSAAVSAWKLDVTVVFPEQHVMPRLFTPTIAAHYEELYKKNNVKIIKEVSVVKLKSGANGEVDGVELTDGTTLDADLVVVGVGARPVVAPFLDAGLKSEAGAIEVDGMFNTSSPGVYAIGDVAAFPLKIYDRRTRVEHVDHARKSATHCVESLVKGKTEAYDYLPFFYSRVFEAPG…
	Bryophyta	Ditrichaceae	Ceratodon purpureus GG1 v1.1	4	CepurGG1.10G043500.1	CpugMDAR1	435	Yes	Yes	SKI	No	-	No	-	-	Class III (cyt/per)	MAAILRKYVVVGGGVGGGYAAREFVKLGLQPGELTIFSGEQAAPYERPALSKAYMFPDSPARLPGFHVCVGSGGEKQLPEWYAEKGIELKLDTKIVKADVENKTVTTDKGDVYQYGTLLVATGSTFLNLEDFKTPGADAKGIFYLRDVRDADKLVEAIKSRKGDEALVVGGGYIGLELAACLTVNNIKVTMVFPDPCFMPRLFTPELASFYEGYYEGKGVNIIKGTSVTAFEKDADGYVTKAILKDGRSLDSSLVVVGIGAKPLLTPFKGLLEEDKGGFKVDSTFKTSVPDVYAIGDVATFPMKMYGESRRVEHVDHARKSAMQAVQAIKAAEKGEVVDDYDYLPFFYSRSFDLSWQFYGDNVGETVIWGREGAGAPGSKFGAYWVKDNKVMGAFLEGG…
					CepurGG1.7G005200.1	CpugMDAR2	435	Yes	Yes	SKI	No	-	No	-	-	Class III (cyt/per)	MAVTFCKYIVVGGGVAGGYAAREFVKLGLQPGELTIFSKEAAAPYERPALSKAYMFPDAPARLPGFHVCVGSGGERQLPEWYAEKGIELKLETEIVKADVENKTVTTDKGEVYEYGTLLLATGSTFLDLADFKTAGADAKGIFYLRDLRDADKLVDAIKGTNGGEAVVVGGGYIGLELAACLTVNKIKVTMVFPDPCFMPRLFTPELASFYEGYYEGKGVNVIKGTSVTAFEKDDNGQVSKVLLKDGRTLESTLVVVGVGAKPVLAPFKGLLEEEKGGFKVDASFKTSAPGVYAVGDVATFPMKMYGDTRRVEHVDHARKSAMQAVQAIKAAEKGEVVDEYDYLPFFYSRSFDLSWQFYGDNVGETVIWGREGAAAPGSKFGAYWVKDNKVLGAFLEGG…
					CepurGG1.6G046800.1	CpugMDAR3	435	Yes	Yes	SKI	No	-	No	-	-	Class III (cyt/per)	MDAAMLKYVLVGGGVAGGYAAREFVKLGVDPGELAIFSKEAVAPYERPALSKAYLFPESPARLPGFHTCVGSGGERQAPEWYADNGIDLHLNSEIAKADTKSKTITTAAGKTFEYGSLLIATGSTFINLADFKTPGADAGGIHYLREVNDADNLVREMKDIKGGEAVVVGGGYIGVELAACLALNSIRVTMVFPDPHFMPRLFTPEIASFYEGYYKGKGINIIKGTSVTAFEKDDQGNVTKVILGDGRSLSTNLVVVGIGAKPRLGPFKGQLEEEKGGFKVDASFRTSAQDVYAVGDVATFPMKMYGDRRRVEHVDHARKSAIQAVQAIKAGEKGETVDEYDYLPFFYSRSFDLSWQFYGDNTGESVIWGLDQAGASGSKFGAYWVNDGKVVGAFLEGG…
					CepurGG1.2G006700.1	CpugMDAR4	488	Yes	Yes	No	457-479	Yes	No	-	-	Class II (per mem)	MGRSFKVVILGGGTAGGYAASEFVKHGLIPGDLCIISQESVAPYERPALSKGYLLSKEPARLPAFHTCVGVGEESHSPKWFQEKGIELVLGTRVTEANVRDRTLITAAGETISYSTLVVATGARVLKLDEFGVTGADAKNVCYLRDIEDATYLVDAMSECREKGGKAVVIGGGYIGMECAAALHGNRIPVTMVFPEEFCMPRLFTPEIARFYEDYYTTKGIQFRKGNVLSSFECEDSGKVTAVILKDGSRIDADLVVVGIGIRPNVDLFEGQLTLEKGGIKVNGKMQSVSNSSVYAVGDVAAFPVPMYSDVRRLEHVDHARKSAAHAVQAFLMGNKVNDYDYLPYFYSRVFTLSWQFYGDNVGQCVLFGDRDAGKFGAYWVHNGRLVGAFLEGGSKIEY…
			Ceratodon purpureus R40 v1.1	4	CepurR40.10G046400.1	CpurMDAR1	435	Yes	Yes	SKI	No	-	No	-	-	Class III (cyt/per)	MAAILRKYVVVGGGVGGGYAAREFVKLGLQPGELTIFSGEQAAPYERPALSKAYMFPDSPARLPGFHVCVGSGGEKQLPEWYAEKGIELKLDTKIVKADVENKTVTTDKGDVYQYGTLLVATGSTFLNLEDFKTPGADAKGIFYLRDVRDADKLVEAIKSRKGDEALVVGGGYIGLELAACLTVNNIKVTMVFPDPCFMPRLFTPELASFYEGYYEGKGVNIIKGTSVTAFEKDADGYVTKAILKDGRSLDSSLVVVGIGAKPLLTPFKGLLEEDKGGFKVDSTFKTSVPDVYAIGDVATFPMKMYGESRRVEHVDHARKSAMQAVQAIKAAEKGEVVDDYDYLPFFYSRSFDLSWQFYGDNVGETVIWGREGAGAPGSKFGAYWVKDNKVMGAFLEGG…
					CepurR40.7G005400.1	CpurMDAR2	435	Yes	Yes	SKI	No	-	No	-	-	Class III (cyt/per)	MAVTFCKYIVVGGGVAGGYAAREFVKLGLQPGELTIFSKEAAAPYERPALSKAYMFPDAPARLPGFHVCVGSGGERQLPEWYAEKGIELKLETEIVKADVENKTVTTDKGEVYEYGTLLLATGSTFLDLADFKTAGADAKGIFYLRDLRDADKLVDAIKGTNGGEAVVVGGGYIGLELAACLTVNKIKVTMVFPDPCFMPRLFTPELASFYEGYYEGKGVNVIKGTSVTAFEKDDNGQVSKVLLKDGRTLESTLVVVGVGAKPVLAPFKGLLEEEKGGFKVDASFKTSAPGVYAVGDVATFPMKMYGDTRRVEHVDHARKSAMQAVQAIKAAEKGEVVDEYDYLPFFYSRSFDLSWQFYGDNVGETVIWGREGAAAPGSKFGAYWVKDNKVMGAFLEGG…
					CepurR40.6G049900.1	CpurMDAR3	435	Yes	Yes	No	No	-	No	-	-	Class III (cyt/per)	MDAAMLKYVLVGGGVAGGYAAREFVKLGVDPGELAIFSKEAVAPYERPALSKAYLFPESPARLPGFHTCVGSGGERQAPEWYADNGIDLHLNSEIAKADTKSKTITTAAGKTFEYGSLLIATGSTFINLADFKTPGADAGGIHYLREVNDADNLVREMKDIKGGEAVVVGGGYIGVELAACLALNSIRVTMVFPDPHFMPRLFTPEIASFYEGYYKGKGINIIKGTSVTAFEKDDQGNVTKVILGDGRSLSTNLVVVGIGAKPRLGPFKGQLEEEKGGFKVDASFRTSAQDVYAVGDVATFPMKMYGDRRRVEHVDHARKSAIQAVQAIKAGEKGETVDEYDYLPFFYSRSFDLSWQFYGDNTGESVIWGLDQAGASGSKFGAYWVNDGKVVGAFLEGG…
					CepurR40.2G006800.1	CpurMDAR4	488	Yes	Yes	No	457-479	Yes	No	-	-	Class II (per mem)	MGRSFKVVILGGGTAGGYAASEFVKHGLIPGDLCIISQESVAPYERPALSKGYLLSKEPARLPAFHTCVGVGEESHSPKWFQEKGIELVLGTRVTEANVRDRTLITAAGETISYSTLVVATGARVLKLDEFGVTGADAKNVCYLRDIEDATYLVDAMSECREKGGKAVVIGGGYIGMECAAALHGNRIPVTMVFPEEFCMPRLFTPEIARFYEDYYTTKGIQFRKGNVLSSFECEDSGKVTAVILKDGSRIDADLVVVGIGIRPNVDLFEGQLTLEKGGIKVNGKMQSVSNSSVYAVGDVAAFPVPMYSDVRRLEHVDHARKSAAHAVQAFLMGNKVNDYDYLPYFYSRVFTLSWQFYGDNVGQCVLFGDRDAGKFGAYWVHNGRLVGAFLEGGSKIEY…
		Funariaceae	Physcomitrella patens v3.3 proteome	4	Pp3c15_710V3.1 (Pp-MDAR1/ Pp1s211_74V6)	PpaMDAR1	433	Yes	Yes	SKV	No	-	No	-	-	Class III (cyt/per)	MATIDRKYIVVGGGVAGGYAAREFVKLGLQPGELTIFSKEAAAPYERPALSKAYMFPEAAARLPGFHVCVGSGGERQLPDWYAEKGIELKLESEIVKADLENKTLTTDKGDVYSYGTLVIATGSTFLNLADFKTAGADAKGIYYLREVHEADKLVDAIKANKGGEAVVVGGGYIGLELAACLTINKIKVTMVFPDPCFMPRLFTPELASFYEGYYENKGVNIIKGTSVTAFEKDDNGHVSKVILKDGRTLDSTLVVVGVGAKPLLGPFKGLLEEEKGGIKVDASFKTSDPNVYAVGDIATFPMKMYGDTRRVEHVDHARKSAMQAVQAIKAAEKGEVVDEYDYLPFFYSRSFDLSWQFYGDNVGETVHWGREAGTPDSKFGAYWVKDNRVMGAFLEGGS…
					Pp3c9_450V3.1 (Pp-MDAR2/ Pp1s90_28V6)	PpaMDAR2	455	Yes	Yes	SKI	No	-	obscure	-	-	Class III (cyt/per)	MPTNIILRIFFSRCNVPESVVMAAILRKYIVVGGGVAGGYAAREFVKLGLQPGELTIFSKEAAAPYERPALSKAYLFPDAPARLPGFHVCVGSGGEKQLPDWYAEKGIELKLETEIVKADVENKTLTTNKGDIYEYGTLILATGSTFLNLADFKTPGADAKGIYYLRDIGDADKIVEAIKASKGDEAVVVGGGYIGLELAACLTMNKIKVNMVFPEPCLMPRLFTPELASFYERYYEGKGVNIIKGTTVTAFEKDDNGHVSKVLLKNGSSVNSTFVVVGVGARPLLAPLKGLIEEEKGGFKVDASFKTSNPNVYAVGDIATFPMKMYGDSRRVEHVDHARKSAMQAVQAIKAAEKGEVVDEYDYLPFFYSRSFNLSWQFYGDNVGETVLWGRNGAAASE…
					Pp3c2_8410V3.1 (Pp-MDAR3/ Pp1s237_59V6)	PpaMDAR3	434	Yes	Yes	AKI	No	-	No	-	-	Class III (cyt/per)	MDAAMLKYVLVGGGVAGGYAAREFVKLGVNPGELAIFSKEPVAPYERPALSKAYLFPESPARLPGFHTCVGSGGERQAPEWYADNGIDLHLSSEIAKADTKSKTITTAQGKTFEYGSLLIATGSTFINLADFKTPGADAGGIHYLREKDDADKLVEEIGANKGGEAVVVGGGYIGVELAACLALNSIRVTMVFPDPHFMPRLFTPEIASFYESYYKAKGINIIKGTSVTAFEKDDQGNVVKVILGDGRSLSTNLVVVGIGARPNLGPFKGLLEEEKGGFKVDSSFRSSAEDVYAVGDIATFPLKMYGDRRRVEHVDHARKSAIQAVQAIKAAEKGETVDDYDYLPFFYSRSFDLSWQFYGDNTGDSVVWGLDGASASGSKFGAYWINDGKVVGAFLEGG…
					Pp3c14_26470V3.1 (Pp-MDAR4/ Pp1s269_53V6)	PpaMDAR4	486	Yes	Yes	No	457-479	Yes	No	-	-	Class II (per mem)	MGRSFRVVILGGGTASGYAASEFVKHGLNPGDLCVISQEMVAPYERPALSKGYLLAKEPARLPAFHTCVGVGEQSHPAKWFQEKGIELVLGTRVTQANVRDKTLLTAAGETISYSILIVATGARVLKLDEFGVTGADAKNVCYLRDIKDATYLVDAMAECREKGGKAVVIGGGYIGMECAAALHGNRIPVTMVFPEDYCMPRLFTPEIARYYEDYYMKKGIQFRKGNVLSSFECDESDKVTAVILKDGSRIDADIVVVGIGIRPNVDLFEGQLMLEKGGIKVNGKMQSVSNASVYAVGDVATFPMPMYSDVRRLEHVDHARKSAAHAVQAILMGNKVDNYDYLPYFYSRVFTLSWQFYGDNVGDSVLFGDQIVGKFGAFWVHNGRLVGAFLEGGSKVEY…
		Sphagnaceae	Sphagnum fallax v0.5 proteome	5	Sphfalx0025s0185.1	SfaMDAR1	434	Yes	Yes	No	No	-	No	-	-	Class III (cyt/per)	MTEKVYKYVIVGGGVSAGYAAREFVQQGLKPGELAIFSTEEFAPYERPTLSKAYLFPEGAARLPNFHVCAGSGGTKQPPEWYTEHGIDLYLSTEVQILDVEAKSLTTSAGATYKYETVIVATGATFVRLADSGVPGADAQGIYYLREIDDADKLLAAIKDKKDGPAVVIGGGYIGLELTACLVKNDVKVTMVYPGPHCMPRLFTPELAAFYEGYYEAKGVTIVKGPRATEFEKDESGQVKTVKLKDGTTIQADIVVVGVGAKPRLELLKGQVAEEKGGFKVDGFFKTSVPHVYAVGDIAAFPMKIYGDIRRVEHVDHARKSAIQAVQAIKAEEKGETIPEYDYLPYFYSRSFDLSWQFYGDNVGEAVTWGREAAQASSSKFGTYWIKDGKVVGAFLEGG…
					Sphfalx0225s0035.1	SfaMDAR2	433	Yes	Yes	No	No	-	No	-	-	Class III (cyt/per)	MAEKTYKYIIIGGGVAGGYAAREFVKLGLQPGELALFSKEAVAPYERPALSKAYLFPQAPARLPGFHVTVGSGGERQPPEWYPANGIDLHLSTEIVKADVGKKTVTTAAGVTYQYGTLIVATGATYIDLKDFKTPGADAQGIYYLREIHEADVLVEAIKAKKGGSAVVVGGGYIGLELAACLTINDIKVTMVFPEPFCMPRLFTSEIAAFYEGYYEGKGVTIIKGTLAAAFEKDEHGHVTTVQLKDGRSLHADLVVVGVGARPVLAPLKGQLKEEKGGFQVDGSFKTSAQDVYAIGDVATFPLKLYGDQRRVEHVDHSRKSAIQAVQAIKAAEKGETVDEYDYLPFFYSRSFDLSWQFYGDNVGESVVWGRDGASAAKSKFGAYWVKDGKVVGAFLEGG…
					Sphfalx0020s0149.1	SfaMDAR3	435	Yes	Yes	No	No	-	No	-	-	Class III (cyt/per)	MAEKSYKYVIVGGGVAAGYAAREFVKQGLKAGELAIFSAEKVAPYERPALSKGYLAPEGAARLPGFHVCVGSGGDKQPPEWYTEKGIDLHLNTQVSMVDVQQKSLTSLAGVSYRFSILILATGSTFTKLSESGVPGADARGIYYLRVIDEADALVAAMKAKKDGAAVVVGGGYIGMELAACLCLNGLKVTMVYPKPFCMPRLFTAELASFYEGYYEGKGITILKGPKTTGFETDATGHVKAVKLDDGSVVPADIVVVGVGAKPLVGLLHGQVVEDKGGFKVDGFFRTSAPHVYVVGDLAAFPLKMFCDIRRVEHVDHARKSGIHAVQAIKAAEEGKTIPEYDYLPYFYSRAFELSWQFYGDNVGEGITWGREGACAAKSKFGTYWVKDGKIMGAFLEGG…
					Sphfalx0007s0134.1	SfaMDAR4	486	Yes	Yes	No	458-480	Yes	No	-	-	Class II (per mem)	MGRAFKVVVLGGGTAAGYAASEFVKLGIHHGDLCIISEESVAPYERPALSKGYLLIEGAAWLPAFHTCVGTGEERHMTKWYKDNGIELVLGTRVKAADVRARTLLTAAGETISYKFLVIATGARVLKLEEFGVTGADAHNVCYLRDVQDAAHLVDQMAACRKVEGKAVVIGGGYIGMECAAALHGNHIPVTMVFPEHHCMARLFTPEIAAFYETYYGKKGVNFIKGNVMASFEQDEFGKVTTVVLKDGRKIAVDLVVVGIGIHPNVDLFEGQLAMEKGGIRVDGKMRSVSNHSVYAVGDVAAFPLKMYGDVRRLEHVDHARKSAAHAVQAIMSSNKVGDYDYLPYFYSRVFTLSWQFYGENVGECILFGDHSASKFGAFWVHKGQLVGAFLEGGSKAEY…
					Sphfalx0083s0021.1	SfaMDAR5	506	Yes	Yes	No	No	-	Yes	Chl (0.595)	chlo: 13, vacu: 1	Class I (chl/mit)	MAGTMVAGCGIIRPGMAIWSSSSAMRGGGGGGGALQQFLLRFRSTSSYASGGGGARRSLTAIAAAADSDSKEYIIVGGGNAAGYAAKAFVENGLEKGKLCIIAKEQVAPYERPTLTKAYLFPPDKGPARLPGFHTSVGGGGERQTPEWYAEKGIEVLYKTSVTSMDLHAKTVKTSSGKSLHYDKLIIATGATASKLPESIGGSLPGVHYIREVADADALVTTLSKKKKVVVIGGGYIGMEVAAALTAWKIDTTVIIPEQHVMPRLFTAGIAKRYEELYEKNGVKFLKGISVKKLKAGPNGQVGAVELSDGTVLDTDLVVVGIGAKPTIGPFVEAGLKSAEGAIEVDGQFQTSSPGVYAIGDVAAFPLKIYNRRTRVEHVDNARKSATHCVNALLKGSSE…
					Sphfalx0123s0037.1	SfaMDAR-like	361										MGRAFKVVVLGGGTAAGYAASEFVKLGIHHGDLCIISEESVAPYERPALSKGYLLIEGAAWLPAFHTCVGTGEERHMTKWYKDNGIELVLGTQVKAADVRARTLLTAAGETISYKFLVIATGARVLKLEEFGVTGADAHNVCYLRDVQDAAHLVDQMAACRKVEGKAVVIGGGYIGMECAAALHGNHIPVTMVFPEHHCMARLFTPEIAAFYETYYGKKGVHFIKGNVMASFEQDEFGKVTTVVLKDGRKIAVDLVVVGIGIHPNVDLFEGQLAMEKGGIRVDGKMRSVSNHSVYAVGDVAAFPLKMYGDVRRLEHVDHARKSAAHAVQAIMSSNKVGAGVAVGVAFVSLAFWYGRRKKRW
			Sphagnum magellanicum v1.1	5	Sphmag15G104600.1	SmaMDAR1	435	Yes	Yes	No	No	-	No	-	-	Class III (cyt/per)	MTEKVYKYAIVGGGVSAGYAAREFVQQGLKPGELAIFSSEEFAPYERPTLSKAYLFPEGAARLPNFHVTVGSGGTKQPPEWYTEHGIDLYLSTEVKILDVEAKSLTTSAGATYKYETVIVATGATFVRLADSGVPGADAQGIYYLREIDDADKLLAAIKDKKDGPAVVIGAGYIGLELTACLVKNDVKVTIVHPGPHFMPRLFTPELAAFYEGYYEAKGVTIVKGPRATEFEKDETGQVKTVKLKDGTTLAADIVVVGVGAKPRLELLKGQVAEEKGGFKVDGFFKTSVPHVYAVGDIAAFPLKKYGDIRRVEHVDHARKSAIQAVQAIKAEEKGETIPEYDYLPYFYSRSFDLSWQFYGDNVGEAVTWGREAAQLSSSKFGTYWIKDGKVVGAFLEGG…
					Sphmag19G089100.1	SmaMDAR2	434	Yes	Yes	No	No	-	No	-	-	Class III (cyt/per)	MAEKTYKYIIIGGGVAGGYAAREFVKLGLQPGELALFSKEAVAPYERPALSKAYLFPQAPARLPGFHVTVGSGGERQPPEWYPANGIDLHLSTEIVKADVENKTVTTAAGVTYQYGTLIVATGATYIDLKDFKTPGADAQGIYYLREIHEADVLVEAIKAKKGGSAVVVGGGYIGLELAACLTINDIKVTMVFPEPFCMPRLFTSEIAAFYEGYYEGKGVTIIKGTLAAAFEKDEHGHVTTVQLKDGRSLHADLVVVGVGARPVLAPLKGQLKEEKGGFQVDGSFKTSAQDVYAIGDVATFPLKLYGDQRRVEHVDHSRKSAIQAVQAIKAAEKGETVDEYDYLPFFYSRSFDLSWQFYGDNVGESVVWGRDGASAAKSKFGAYWVKDGKVVGAFLEGG…
					Sphmag02G100400.1	SmaMDAR3	436	Yes	Yes	No	No	-	No	-	-	Class III (cyt/per)	MAEKSYKYVIVGGGVAAGYAAREFVKQGLKAGELAIFSAEKVAPYERPALSKGYLSPEGAARLPGFHVCVGSGGDKQPPEWYTEKGIDLHLNTQVSKVDVQQKSLTSLVGVSYRFSILILATGCTFTKLSESGVPGADARGIHYLRVIDEADALVAAMKAKKDGAAVVVGGGYIGMELAACLCLNGLKVTMVYPKPFCMPRLFTAELASFYEGYYEGKGITILKGPKTTAFETDATGHVKGVKLNDGSVVPADIVVVGVGAKPLLGLLNGQVVEDKGGFKVDGFFRTSAPHVYVVGDLAAFPLKMFCDIRRVEHVDHARKSGIHVVQAIKAAEEGKTIPEYDYLPYFYSRAFELSWQFYGDNVGEGITWGREGACAAKSKFGTYWVKDGKIMGAFLEGG…
					Sphmag03G028200.1	SmaMDAR4	487	Yes	Yes	No	458-480	Yes	No	-	-	Class II (per mem)	MGRAFKVVVLGGGTAAGYAASEFVKLGILHGDLCIISEELVAPYERPALSKGYLLIEGAARLPAFHTCVGTGEERHMTKWYKDNGIELVLGTRVKAADVRARTLLTAAGETISYKILVIATGARVLKLEEFGVTGADAHNICYLRDVQDSAHLVDQMSACRKVEGKAVVIGGGYIGMECAAALHGNRIPVTMVFPEHHCMARLFTPEIAAFYETYYEKKGVNFIKGNVMASFEQDEFGKVTTVVLKDGRKIAVDLVVVGIGIHPNVDLFEGQLAMEKGGIRVDGKMRSVSNHSVYAVGDVAAFPLKMYGDVRRLEHVDHARKSAAHAVQAIMSSNKVGDYDYLPYFYSRIFTLSWQFYGENVGECILFGDHSASKFGAFWVHKGQLVGAFLEGGSKAEY…
					Sphmag17G079900.1	SmaMDAR5	506	Yes	Yes	No	No	-	Yes	Chl (0.498)	chlo: 12, vacu: 1.5, E.R._vacu: 1.5	Class I (chl/mit)	MAGTMVAGCGIIRPGMAIWCSSSAMRGGGGGGGGVLQQFLLRFRSTSSYASGGGGARRSLTAIAAAPDSDSKEYIIVGGGNAAGYAAKAFVENGLEKGKLCIIAKEQVAPYERPTLTKAYLFPPDKGPARLPGFHTSVGGGGERQTPEWYAEKGIEVLYKTSVTSMDLHAKTVKTSSGKSLHYDKLIIATGATASRLPESIGGSLPGVYYIREVADADALVTTLSEKKKVVVIGGGYIGMEVAAALTAWKIDTTVIIPEQHVMPRLFTAGIAKRYEELYEKNGVKFAKGVSVKKLTAGPNGQVGAVELSDGTVLDTDLVVVGIGAKPTIGPFVEAGLKSAEGAIEVDGQFQTSSPGVYAIGDVAAFPLKIYNRRTRVEHVDNARKSATHCVNALFKGSS…
	Polypodiophyta	Pteridaceae	Ceratopteris richardii v2.1	6	Ceric.33G027500.1	CriMDAR1	436	Yes	Yes	No	No	-	No	-	-	Class III (cyt/per)	MSATYFKYIILGGGVAAGYAAREFASLGLCPGELAIISKEAVAPYERPALSKAYLFPEGAARLPGFHTCVGSGGERLPPEWYGEKGIELILNTLIVKVDLAQKTLESSSGNIFKCGTLIIATGATFIKLTDFGVQGADAKGIYYLREIDDADALIEGIHEKPGGKAVIVGGGYIGLELAADLIINKLDVTMVYPEPWCMPRLFTAEIAAFYEGYYQSKGVKIVKGTVATGFESDASGHVNLVKLKDGRELSADIVVVGVGARPLVSLFKGQLEEEKGGIKVDSFFQTSVSGVYAVGDVATFPLKLYNENRRVEHVDHARKSAIQAVQHIKATEEGKSIPEYDYLPYFYSRSFDLSWQFYGDNVGDSVVFGQTDPSVPKAKFGAYWIKDEKVVGAFLENG…
					Ceric.09G034300.1	CriMDAR2	434	Yes	Yes	No	No	-	No	-	-	Class III (cyt/per)	MATHFKYIILGGGVAAGYAAKEFFNSGIKSGELAIISKESVAPYERPALSKAYLFPEGAPRLPGFHTCVGSGGERLVPEWYAENGIELILNTEIVKADLTRKTLESSVGRIFEFDILIIATGATFIKLTDFGVEGANAKGIYYLREIDDADTLFEGVRDKVGGKAVVVGGGYIGLELAASLIINKLDVTIVYPEPWCMPRLFTAEIADFYERYYQNKGIKIIKGTVAAGFESDASGHVNLVKLKDGRELSADIVVVGVGARPLINLFKGQVDEERGGIKVDSYFRTSVPAVYAVGDVATFPLPLYNDKRRVEHVDHARKSAIQAVQHIKASEEGESIAEYYYLPYFYSRSFDLSWQFYGDNVGDLVVFGQRDPLVPKAKFGAYWIKDGRVMGAFLESGT…
					Ceric.09G026400.1	CriMDAR3	414	Yes	Yes	No	No	-	No	-	-	Class III (cyt/per)	MTEPMATHFKYIILGGGVAAGYAAKEFFNSGIKSGELAIISKESVAPYERPALSKAYLFPEGAPRLPGFHTCVGSGGERLVPEWYAENGIELILNTEIVKADLTRKTLENFGVEGANAKGIYYLREIDDADTLFEGVRDKVGGKAVVVGGGYIGLELAASLIINKLDVTIVYPEPWCMPRLFTAEIADFYERYYQNKGIKIIKGTVAAGFESDASGHVNLVKLKDGRELSADIVVVGVGARPLINLFKGQVDEERGGIKVDSYFRTSVPAVYAVGDVATFPLPVYNDKRRVEHVDHARKSAIQAVQHIKASEEGESIAEYYYLPYFYSRSFDLSWQFYGDNVGDLVVFGQRDPLVPKAKFGAYWIKDGRVMGAFLESGTPEENKAIAKVAKLRPEVESR…
					Ceric.39G006100.1	CriMDAR4	484	Yes	Yes	No	453-475	Yes	No	-	-	Class II (per mem)	MGRAFKFVILGGGVAAGYAALEFVKHGVHHGDLCIISEESVAPYERPALSKGCLLPEGAATLPSFHTCVGIGAERQTPKWYKEHGIELVLSTRVKSVDVKRKTLLSAAGETITYKTLIIATGARVLRLEEFSVTGAYANNICYLRDLEDANKLVQVMDMHKGGTAVVIGGGYIGMECAAALISNNIGVTMVFPEHHFMARLFTAEIAAFYEDYYMKRGVNFIKGTVMAAFESDENKNVTAVVLKDGTHIKADMVVVGIGIRPNISLFEGQLALEKGGIKVNGKMQTSNASVYAVGDVVTFPLKSYRDMRRLEHVDHARKSAAHAVQAILSSDKVKDYDYLPYFYSRVFTLSWQFYGDNIGDCVIFGTLKDKKFGAFWVEKGQVIGAFLEGGTKEEYITL…
					Ceric.14G063500.1	CriMDAR5	484	Yes	Yes	No	455-477	Yes	No	-	-	Class II (per mem)	MGRAFKTVILGGGVAAGYAALEFVKHGINHGELCIISEEPVAPYERPALSKGCLLPEDAATLPAFHTCIGTGAERQTPKWYKEHGIELVLNTRIKSADLRMKTLLSAAGETISYKTLIIATGARVLRLEEFGVAGADAKNICYLRDWNDSRKLVDIMAECRGGRAVVIGGGYIGMETAAALVANRVKVTMVFPEQHCMARLFTPEIAAFYEEYYKKRGVEFIKGTVMSSFESDAEKKITAIVLKDNRQIKADMVVVGIGIRANVGLFEGQLILEKGGIKVNGKMQTSNPSVYAVGDVVAFPLKLYGDVRRLEHVDHARKSAAHAVEAIMSPEKVQDYDYLPFFYSRVFTLSWQFYGDNVGKCVLFGNPEVQKFGAFWVDKGILMGAFLEGGNKDEYLRL…
					Ceric.35G042000.1	CriMDAR6	496	Yes	Yes	No	No	-	Yes	Mit (0.576)	cyto: 8, plas: 3, chlo: 2, mito: 1	Class I (chl/mit)	MSSLAFISFLRGFRHGVSLWCPQSCHQGNELRFSLKHGIEGDWPKVRRSFTISCAANADLSKDYVIVGGGNAAGYAVRAFTEHGVDGSKICIVSKEKVPPYERPALTKAYLFPLDKSPARLPGFHTCVGTGNPRQTDEWYKDKGIQVLYDTAATGVDLDKKKLFTSSGSSIAYDNLIIATGASAARLPKTIGGDLQGVHYIREVADADALIEALQTCKKLVVIGGGYIGMEVAAAATAWKLDTTMVFPEPHIMPRLFTPSIADKYEDLFKKYGVRFTKGVTVKRIISGHDGKVSAVELSDGVVLDADTVVVGIGAKPAVGPFIETGLKMSEGGIEVDGQFRTSSPNVWAIGDVAAFPLKIYNRITRVEHVDHARKSAQHCVESLLKVQQDPYDYLPYFY…
	Lycopodiophyta	Selaginellaceae	Selaginella moellendorffii v1.0 proteome	3	145962	SmoMDAR1	433	Yes	Yes	SKV	No	-	No	-	-	Class III (cyt/per)	MASAAYKYIIVGGGVSAGYAAREFVNQGIKSGELAIISKEAVAPYERPALSKAYLFPENAARLPGFHVCVGSGGERLAPEWYAEKGIELILDTEVVKADIATKTLTTSAGNSFKYDVLVAATGSTFIKLSDFGVAGADSKGIYYLREIREADSLIEAIKSKKDGHAVVVGGGYIGLELAAVLTMNKLQVTMVYPEPWCMPRLFTSDIASFYEGYYLSKGVKIVKGTVASGFELDAEGHVTAVKLKDGRELAADIVIVGVGARPLTTLFKGQLEEEKGGIKVDGFFKTNNEDVYAVGDIATFPMKIYGEQRRVEHVDHSRKSAIQAVQAIKAKEEGRSIPEYDYLPFFYSRAFDLSWQFYGDNVGETVSFGRDEAAATKKFGGYWVKDGKVVGVFLEGGS…
					440551	SmoMDAR2	488	Yes	Yes	No	464-482	Yes	No	-	-	Class II (per mem)	MGRSFRFVILGGGVSAGYAALEFVRLGIPAGDLCIITDEAVAPYERPALSKGFLLPEGAVRLPAFHTCVGVGAERLTARWYKEHGIELLLNTQVVSVDLKRQTLLTSAKETIAYLTLIVATGARVLRLEEFGVTGADARNIFYLRNLHDATKLVEAMQSCSGGKAVVIGGGYIGMECAAALVSNGVHVTMVFPESHCIARLFTPQIATFYEDYYTRRGVVFVKGTVMSTFESDIDGKVAAVVLKDGTRLPADLVVVGVGIRPNTTLLEGQLTMEKGGIKVNGKMRTSNSTVYAVGDVAAFPLKMYGDVRRLEHVDHARKSAAHAVESIMHPERAKDYDYLPYFYSRVFSLSWQFFGDNSGECLLFGDLKSEKFGAYWVDRGRLVGAFLEGGSKSEYAAL…
					170362	SmoMDAR3	487	Yes	Yes	No	No	-	Yes	Mit (0.848)	chlo: 11, mito: 3	Class I (chl/mit)	MASSRLFGAGARFSHSAIVLPAPRHRFASRRSGYAVAAKAHLNENREYVIVGGGNSAGYLAHAFAEKGLADGKLCIVAKETVPPYERPALTKAYLFPLDEKPARLPGFHTCVGSGWERQTPEWYKEKGIELLQGTTVSGLDIAASTLETSSGDTIKYGNLIIATGCTAARLPEKIGGNLPGVHYIREVADADSLVASLVRAKKAVIIGGGYIGLEVSAATSSWNIDTTVVFPEPHVMFRLFTPSIAKHYEKFYEDRGVKFVKGPVVSKIVSGSSGRVEKVELSDGTTLEADVVVVGIGAKPAIGPFVDAGLATAEGGIQVDGQFRTSVPGISAIGDVAAFPLKMYGRTTRVEHVDHARKSALHCANALLETLTDPYDYLPFFYSRVFENSKSSRKLWWQ…
	Angiosperms	Amborellaceae	Amborella trichopoda v1.0 proteome	3	evm_27.model.AmTr_v1.0_scaffold00069.193	AtrMDAR1	433	Yes	Yes	CKM	No	-	No	-	-	Class III (cyt/per)	MAETAFDYIIVGGGVAAGYAAREFVKLGIQGKLAIISKEAVAPYERPALSKAYLFPEGAARLPGFYVCVGSGGERLLPEWYAEKGIELILKTEIVRANLSAKTLRSADGKTFKYGTLIIATGSTVIKLSDFGVQGADAKGIFYLREIEDADKLVEAIQKSEGKKCVVVGGGYIGLELAAVMKLNKFDVTMVYPEPWCMPRLFTSSIAAFYEGYYENKGVTIIKGTVAVGFDSDSNGNVKVVKLKDGRALEADIVIVGVGARPLTNLFKGQVEEEKGGIKVNGFFQTSFDGVYAVGDVVTFPMKLYNETRRVEHVDHARKSAEQAMKAIKASQEGKTIEEYDYLPYFYSRAFDLSWQFFGDNVGETVLFGDANPSSPKPKFGSYWIKDGKVIGVFLEGGT…
					evm_27.model.AmTr_v1.0_scaffold00096.88	AtrMDAR2	481	Yes	Yes	No	453-475	Yes	No	-	-	Class II (per mem)	MGRAFLYVILGGGVAAGYAALEFTRRGIGHGELCIISEEPVAPYERPALSKGFLLPEDPARLPSFHTCVGAHEERLTPKWYKEHGIELVLGTRVMSADVRRQTLLTSSGETISYKTLIIATGARALKLEEFGVMGSDAPNVCYLRNLADASRLVNVMQSAAGGKAVVIGGGYIGMECAASLVTNKISVTMVFPEEHIMARLFTPTIAAFYEDYYSSKGVEFIKGTVLSSLETNSLGQVVAVNLKDGRRLPADMVVVGIGIRPNTMLFEGQLTIDEKNGGIKVDAKMQTSNRSVYAVGDVASFPLPLLGSRNRRLEHVDCARKSAIHVVSSIMDPKDTGNFDYLPFFYSRVFTLSWQFYGDNAGEVVHFGDLSSFQGPFGAYWVNGKGQIVGAFLEGGSK…
					evm_27.model.AmTr_v1.0_scaffold00001.90	AtrMDAR3	498	Yes	Yes	No	No	-	Yes	Chl (0.945)	chlo: 12	Class I (chl/mit)	MAASMVISNSSAIKQGISLFCPQSPFVKQSSCRSGMSFSSFRRRTIVTASSAAFANENREFVIVGGGNAAGYAARTFVEHGLADGRLCIVSKEAVAPYERPALTKAYLFPLDKKPARLPGFHTCVGSGGERQTPEWYEKQGIEVLYEDPVTTLDTEAQTLTTASGKLLKYGSLIIATGCTAARLPEGIGGNLPGVHYIRDVADADMLISSLKKAKKVVVIGGGYIGMEVAAATVGWNLDTTVIFPDDHLMPRLFTASLARRYEDFYQENGVKFLKGMMVDKLEAGSDGRVAVVRLKNGSLVEADTVIVGIGAKPAIGPFETLGLNNSVGGIQVDSQFRTSIPGILSIGDVAAFPLKIYDRIVRVEHVDHARKSAQHCVKALLSIHTQPYDYLPYFYSRV…
					evm_27.model.AmTr_v1.0_scaffold00040.170	AtrMDAR-like	332										METHSFKYVILGGGVSAGYAAREFVKQGLRPGDLAIISKESVAPYERPALSKGYLFPEGAVDLPGFHVCVGSGGERLLPEWYSEKGIKLILGTEVTKVNIAEKTLTTAAQAVFKYETLIIATGSSVIRLSNQGANAKNIFYLREIEDASELRKAVGANKNGKAVVVGGGYIGLELGAVLRMHNYDVTIVYPEPWFLPRLFTAELAHFYEGHYKHKGVTLIKGTRAVGFESHADGTVKTVKLKDGRELDADIVVVGIGARPLISLFKDQLEEEKGGIKTDGFFKTSEPGVYAIGDVATFPMKMYGDMRRVEHVDHARKSAEQAVKVKSIKENL
	Monocots	Bromeliaceae	Ananas comosus v3.0 proteome	4	Aco023487.1	AcomMDAR1	435	Yes	Yes	SKI	No	-	No	-	-	Class III (cyt/per)	MAEAKHFKYVILGGGVAAGYAAREFAKQGLNPGELAIISKEAVAPYERPALSKGYLFPQGAARLPGFHVCVGSGGERLLPEWYSEKGIELILSTEIVKANLASKTLTSATGATFTYDILIIATGSTVVQLSDFGVQGADSNNIFYLREIDDADRLVAAIQAKKDGKAVIVGGGYIGLELGAALQINNLDVTMVYPEPWCMPRLFTAGIAAFYEGYYANKGIKIVKGTVAVGFDSDANGDVIAVRLKDGRVLEADIVVVGVGGRPLTSLFKGQVAEDKGGIKTDGFFETSIPGVYAIGDVATFPLRLFNDIRRVEHVDHARKSAEQAVKAIKASEEGKLIEEYDYLPYFYSRSFDLSWQFYGDNVGDSILFGDNDPTSPKPKFGTYWIKDGKVVGVFLEG…
					Aco028583.1	AcomMDAR2	407	Yes	Yes	CKI	No	-	No	-	-	Class III (cyt/per)	MSEEKHFKYVVLGGGVAGGYAAREFAKQGLNPGELAIISKEAVAPYERPALSKGYLFPQGAARLPGFHVCVGSGGERLLPEWYSEKGIELILNTEIVKADLTSKTLTSATGTAFTYDILIIATGSSLVAAIEAKKGGKAVVVGGGYIGLELSAALRINNFDVTMVYPEPWCMPRLFTADIAAFYEGYYANKGVKIVKGTVAVGFDSDKKGDVTAVKLKDGRVLDADIVVVGVGARPLTTLFKGQVAEEKGGIKTDGFFETNIPGVYAVGDVATFPMKLYSELRRVEHVDHARKSAEQAVKAIKASEKGESVEEYDYLPFFYSRAFDLSWQFYGDNVGDTVIFGENDPASPKPKFGSYWVKDGKVFGAFLEGGSPDENKVIAKVARVQPPVADVEELRKE…
					Aco010867.1	AcomMDAR3	472	Yes	Yes	No	443-465	Yes	No	-	-	Class II (per mem)	MGRAFAYVILGGGVAAGYAALEFSRRGVAAGELCIISDESVAPYERPALSKGYLLPEAPARLPFFHTCVGTNDERLTPKWYKEHGIELVLGTKVTSADVRRKTLITATGETISYKILIIATGARALKLEEFGVKGSDAENVCYLRNLDDANRLVNVMQSCAGGNAVVIGGGYIGMECTAALVTNRIKVTMVFPEKHCMFRLFTPKIAEFYENYYKSKGVNFIKGTVLSSFENDSTGKVMAVILRDGTRLPTDMVVVGIGIRANTALFEGQLTLEKGGIKVNGRMQTSNSSVYAVGDVAAFPVKLFDNDIRRLEHVDSARKTARHTVAAIMAPAKTTNLDYLPFFYSRVFSLSWQFYGDNVGEVVHFGDFSSGKFGSYWVDKGRVVGAFLEGGGREDYET…
					Aco013295.1	AcomMDAR4	502	Yes	Yes	No	No	-	Yes	Chl (0.961)	chlo: 13	Class I (chl/mit)	MSSALRSMANTVLFSPSSSSPSSWALKRGLGLRRVPRCPNSLGRALRRSFVAAAANSPGFANENREFVIVGGGNAAGYAARTFVEHGMADGRLCIVSKEAVAPYERPALTKGYLFPPDKKPARLPGFHTCVGSSGERQTPEWYTEHGIEVLYQDPVVAFDGQKQTVTTTSGKILKYGSLIVSTGCEAARFPEKIGGNLPGVHYIRDVADADSLVSSLGRAKKVAVIGGGYIGMEVAAAAAGWNLDTTIIFPEDHIMPRLFTPSLARRYEELYQQNGVKFMKGVLIDKLEAGAGGRVANVILKNGSVIEADTVVVGIGAKPVVSPFEAVGLNNSVGGIQVDSHFRTSLPGVFAVGDVAAFPLKIYNRTARVEHVDHARKSAQHCVRTLLTAQTQPYDYLP…
		Musaceae	Musa acuminata v1 proteome	4	GSMUA_Achr2T20300_001	MacMDAR1	434	Yes	Yes	SKI	-	-	No	-	-	Class III (cyt/per)	MAEKHFKYVILGGGVAAGYAAREFVKLGLNPGELAIISKESVAPYERPALSKGYLFPQGAARLPGFHVCVGSGGERLLPEWYAEKGIELILGTEIVKADLASKTLTSAADVIIKYDILIIATGSTVIRLSDFGVQGADANNIFYLREIDDADKLVAAIHAKKDGKAVIVGGGYIGLELGAALKINNLDVTMVYPEPWCMPRLFTAGIAAFYEGYYANKGIKIIKGTVAVGFDSDANGDVTAVRLKDGRVLEADIVVVGVGGRPLITLFKGQVEEEKGGIKTDGFFKTSIPDVYAVGDVATFPLKLYNEQRRVEHVDHARKSAEQAVKAIKAVEEGESIEEYDYLPYFYSRSFDLSWQFYGDNVGDTILFGDNDPTSAKPKFGTYWIKEGKVVGVFLESG…
					GSMUA_Achr1T17030_001	MacMDAR2	434	Yes	Yes	SKI	-	-	No	-	-	Class III (cyt/per)	MAEKHFKYVILGGGVAAGYAAREFAKHGLNPGELAIISKEAVAPYERPALSKGYLFPQGAARLPGFHVCVGSGGERLLPEWYSENGIELILSTEIVKADLASKTLTSAAGATFTYDILIIATGSTVINLSDFGTPGANANNIFYLREIDDADKLVAAIETKKNGKVVIVGGGYIGLELSAVMKMNNFDVTMVYPEPWCMPRLFTSDIAAFYEGYYANKGVKIDKGTLVVGFDSDANGDVTSVKLKDGRVLEADIVVVGVGGRPLTKLFKAQVEEEKGGIKTDWFFQTSVPGVYAVGDVATFPMKLYNDIRRVEHVDHARKSAEQAVKAIKASEEGKVIDEYDYLPYFYSRSFDLSWQFYGDNVGETVMFGDNDPASAKPKFGSYWIKDGKLLGAFLEGG…
					GSMUA_Achr6T09110_001	MacMDAR3	472	Yes	Yes	No	444-466	Yes	No	-	-	Class II (per mem)	MGRAFVYVILGGGVAAGYAALEFARTGVAHGELCIISEETAAPYERPALSKGYLLPEAPARLPSFHTCVGANDERLTPKWYKEHGIELVLGTRVKSADVRRKTLITATGETISYEILIIATGARALKLEEFGVRGSDAENVCYLRNLADANRLVAVMQTCTGGNAVVIGGGYIGMECAAALATNRIKVTMIFPEAHCMARLFTPKIAEFYENYYKSKGVKFIKGNVLTSFENDSEGKVKAVILKDGTRLLADMVVVGIGIRPNTGLFEGQLHLEKGGIKVNGRMQTSNTSVYAVGDVAAFPVRLFGNEIRRLEHVDSARKTARHAVAAIMAPKTTGDLDYLAFFYSRVFTLSWQFYGDNVGSVIHFGDFNSGRFGAYWTNKGVIVGAFLEGGSREDYEA…
					GSMUA_Achr5T17510_001	MacMDAR4	479	Yes	Yes	No	No	-	Yes	Chl (0.904)	chlo: 13	Class I (chl/mit)	MSTSPFSSCAFQQRTSSWWPSRRPPSTPTSRRSLVVAAAASNFANENREYVIVGGGNAAGYAARTFVEHGMADGRLCIVSKEAVAPYERPALTKGYLFPLDKKPARLPGFHTCVGAGGERQTSEWYKEHGIEVLYEDPVAAIDIQNQILTTSSGNHLKYGSLIISTGCAAVRFPENIGGNLPGVHYIRDVADADSLVSSLEKAKKVVVIGGGYIGMEVAAAAAGWNLDITIIFPEDRIMPRLFTPSLARRYEELYQKNGIKFIKGVLIDKLEGGTDGRVATVLLRNGSIIEADTVIVGIGAKPVVSPFEAVGLNNNVGGIQVDSLFRTSIPGIFAIGDVAAFPLKIYDRMARVEHVDHARKSAQHCVRTLLTAHTQPYDYLPFFYSRVFEYEGSSRKIW…
		Araceae	Spirodela polyrhiza v2 proteome	3	Spipo0G0082500	SpoMDAR1	434	Yes	Yes	SKI	No	-	No	-	-	Class III (cyt/per)	MAEKHFKYVILGGGVAAGYAAREFSRLGVNPGELAIISKEAVAPYERPALSKAYLFPQGSARLPGFHVCVGSGGERLLPEWYTEKGIELILSTEIVKADLASKALVSSSGEIFKYDTLIIATGSTVIKLSDFGVRGADAKGIFYLREIDDADKLVETIQAKKGGKAVIVGGGYIGLELGAALRINDLDVTMVYPEPWCMPRLFTSGIAAFYEGYYANKGIKIVKGTVAVGFDSNADGEVTAVNLKDGRTLEADIVVVGVGGRPLTTLFKGQVEEEKGGIKTDAFFKTSVPDVYAVGDVATFPLKLYSELRRVEHVDHARKSAEQAVKAIKASEGVGSVEEYDYLPYFYSRAFNLSWQFYGDNVGETVLFGDSDPASAAPKFGSYWIKDGRVVGAFLEAG…
					Spipo14G0034800	SpoMDAR2	473	Yes	Yes	No	444-466	Yes	No	-	-	Class II (per mem)	MGRAFVYVILGGGVAAGYAALEFTRKGVQPGELCIISEETVAPYERPALSKGFLLPEAPARLPAFHTCVGANDERLTPKWYKEHGIELVLGTRVKAADLRRKTLLTATGETISYKTLIIATGARALRLEEFGIRGAGAENICYLRSLSDASKLVDVMKASSGGHAVVIGGGYIGMECAAALVTNRIRVTMVFPEAHCMARLFTPKIADFYEEYYESKGVNFIKGTVLASFENNSDGKVVAVILRDGTRVPTDMVVVGIGITPNTSLFEGQLTMDMGGIKVNGQMQTSNSSVYAVGDVAAFPVKLFGGGVRRLEHVDSARQTARHAVSAIMEPGKTRDIDYLPFFYSRVFGLSWQFYGDNKGEVVHYGDFNGARFGAYWVDRGRLVGAFLEGGDREEYEA…
					Spipo17G0008700	SpoMDAR3	494	Yes	Yes	No	No	-	Yes	Chl (0.877)	chlo: 11, mito: 3	Class I (chl/mit)	MATAPGTSTLRHGISLWCPQSPALRRVNPPPCSHLGASSFRRSLAVAASSSFANENREYVIVGGGNAAGYAARTFVEHGMADGRLCIVTKEAVAPYERPALTKGYLFPPEKKPARLPGFHTCVGSGGERQTPEWYKEHGIEVIYADPVTNLDIQSHSLRTSSGKNLKYGSLIIATGCTSVRFPAGIGGSLPGVHYIRDVADADSLVSSLERAQKVVVIGGGYIGMEVAAACAGWKLDTTVIFPENHIMPRLFTSSIAEKYEDLYKENSVKFLKGALIDKLEAGSDGRVAAVRLKNGSVVEADTVIVGIGAKAAVSPFEAVGTNDSVGGIQVDGQFRTRVPGIFAIGDVAAFPLKIYDRVTRVEHVDHARRSAKHCVGALLSIHTNPYDYLPYFYSRVFE…
		Zosteraceae	Zostera marina v2.2 proteome	2	Zosma165g00240.1	ZmarMDAR1	434	Yes	Yes	CKI	No	-	No	-	-	Class III (cyt/per)	MAAKSFKYIVLGGGVSAGYAAREFAKQGVKPGELAIISKEAAAPYERPALSKGYLFPQGPARLPGFHVCVGGGGERLLPSWYPDNGIELILSTEIVKADVSSKTLTSASGETFKYDTLIIATGSTVIRLSDFGVQGADANNIFYLREIDDADKLVAAIQSKKDGKVVIVGGGYIGLELGAALSMNNLDITMVYPEPWCMPRLFTSEIASFYEGYYANKGIKIIKGTVASGFDSDTNGDVNAVRLKDGRVLDADIVVVGVGGRPLTTLFKGELVEEKGGIKTDGFFKTSVADVYAVGDVATFPLKMYGELRRVEHVGHARKSAEQAVKAIKACEEGSLIEAYDYLPFFYSRAFDLSWQFYGDNVGDTVLFGDNDPSSEKPKFGTYWIKDGKVVGAFLESG…
					Zosma214g00330.1	ZmarMDAR2	473	Yes	Yes	No	445-467	Yes	No	-	-	Class II (per mem)	MGRAFVYVILGGGVAAGYAALEFSKRGILPGELCIISEESVAPYERPALSKGFLLPEEPSRLPAFHTCVGTKEEKLRHKWYKEHGIELVLGTRVKSADVRRNTLTTTTGETISYRFLIIATGARALKLEECGIRDSDAENVCYLRNLADAMRLVDTMQNSAGGNAVVIGGGYIGMECAAALVTNRIKVTMVFPEPHCMAHLFTPKIADFYENYYASKGITFVKGTVLSSFEIGADDLVKAVILKDGARIQTDMVVVGIGIRANTTLFDNQLIIEKGGIKVNGYMQTSHKSVYAVGDVASFPIQLFGGDIRRLEHVDSARKTARHAVASIMAPEKRRDLDYIPFFYSRVFTLSWQFYGENRGQVVHYGNFVSGRFGAYWVKKRRIVGAFLEGGTSEEYEA…
		Poaceae	Brachypodium distachyon v3.1 proteome	5	Bradi4g38430.1	BdiMDAR1	435	Yes	Yes	SKI	No	-	No	-	-	Class III (cyt/per)	MASEKHFKYVIVGGGVSAGYAAREFAKQGVQPGDLAIISKEAVAPYERPALSKAYLFPQNPARLPGFHVCVGSGGERLLPEWYSEKGIELILGTEIIKADLASKTLTSAAGATFTYEILLIATGSSVIKLSDFGTQGADSNNILYLREVDDADKLYAAIQAKKGGKAVVVGGGYIGLELSAVLKMNDLDVTMVYPEPWCMPRLFTADIAAFYESYYANKGVKIVKGTVAVGFDADANGDVTAVKLKDGRVLEADIVVVGVGGRPLTTLFKGQVAEEKGGIKTDASFETSVPGVYAVGDVATFPMKIYNDVRRVEHVDHARKSAEQAVKAIKGKESGEAVPEYDYLPYFYSRSFDLSWQFYGDNVGETVLFGDSDPSSAKPKFGSYWIKDGKVLGAFLEG…
					Bradi3g42760.3	BdiMDAR2	493	Yes	Yes	SKI	No	-	Yes	Chl (0.737)	chlo: 14	Class III (cyt/per)	MATKRIKRERTPAFSSHLLLLFHSSLPPSLPRSSSFPSFSRINSSSSGRPVHPPEPETMASEKHFKYLVLGGGVAAGYAAREFAKHGLQPGELAIISKESVAPYERPALSKGYLAPQNAARLPGFHTCVGSGGEKLLPEWYADKGIELILSTEIVKADLATKTLTSADGATFICEILLIATGSSTIKLTDFGVQGAESNNILYLRDIEDADKLVAAMQAKKDGKAVVVGGGYIGLELGAALKTNNFDVTMVYPEPWCMPRLFTAGIAHFYEGYYASKGINIVKGTVASGFDADANGDVSKVNLKDGRVLDADIVIVGVGGRPLTGLFKGQVEEEKGGLKTDTFFETSVAGVYAIGDVATFPMKLYNEPRRVEHVDHARKSAEQAVKAIKAKETGETAAE…
					Bradi3g52862.1	BdiMDAR3	477	Yes	Yes	No	5-24, 449-471	Yes	No	-	-	Class II (per mem)	MGRAFVYVVLGGGVAAGYAALEFARRGGYSRGELCIISEEAVAPYERPALSKGYLLPEDPARLPGFHTCVGANDELLTTKWYKEQGIELVLGTKVISADVRRKTLLTATGETISYKTLIIATGARALKLEEFGISGSDATNICYLRSLDDADKLVNAMSSCSGGNAVVIGGGYIGMECAAALVTNKIKVTMVFPENHCMARLFTQKIAEYYESYYTSKGVTFTKGTVLTSFEKEDPTGKVTAVVLKDGKHLPADMVVVGIGIRANTSLFEGQLLMEKGGIKVNGQMQTSDSSVYAVGDVAAFPIKLFDGDTRRLEHVDSARRTARHAVAAILEPSKTRDVDYLPFFYSRVFTLSWQFYGDNVGEVVHYGDFASSSPSFGAYWISKGRITGAFLEGGSRE…
					Bradi3g52856.2	BdiMDAR4	498	Yes	Yes	No	464-486	No	No	Mit (0.418)	cyto: 5.5, chlo: 5	Class II (per mem)	MGRAFAYVILGGGVAAGYAALELVRHRNGVSPGELCIISDEAVAPYERPALSKGYLLPRGAARLPAFHTCVGANDELLTEQWYKEHGIELVLATRVISADLRRKTLLTDTGETISYKTLIVATGARALKLEEFGVGGSHAANVCYLRNLEDADKMVGVMRSCHGGSAVVIGGGYIGMECAAALVAHEIKVTMVFPGKHCMDRLFTPKIAEFYEKYYTAKGVAFIKGTAVTSLEVSDGKCNCMPQVTEAILRDGRRLPCDMVVVGIGARANTGLFDGQLATEKRGGIKVDARMRASDAAVYAVGDVAAFPVALFGGDLRRFEHVDCARRTARRAASAILQDPAASNGDNAKEEGFDYLPFFYSRVFALSWQFYGDNAAGDAVIHFGDFSPGPAAPRFGAC…
					Bradi3g17120.1	BdiMDAR5	506	Yes	Yes	No	No	-	Yes	Mit (0.873)	chlo: 10, mito: 4	Class I (chl/mit)	MTSALRRKAAQMASTAAAAAGTASGCRYYSQTSWALRRLGFGGAGLARPAAPRRAFSVSAAAVFDNENREYVIVGGGNAAGYAARTFVEHGMADGRLCIVSKEAVPPYERPALTKGYLFPPEKKPARLPGFHTCVGSGGQRQTAEWYKENGIEVLYEDPVEAFDGKTQTLKTSSGKILKYGSLIISTGCAAARLPEKIGGNLPGVHYIRDVADADSLVSSLGKAKKIVVIGGGYIGMEVAAAACGWNLDTTIIFPEDHIMPRLFTPSLAEKYEELYEQNGVKFVKGALIDKLDAGSDGRVSSAVLKDGSVVEADTVIVGIGAKPAVSPFEAVGVNNEVGGIEVDSMFRTSVPGIFAIGDVAAFPLKMYDRIARVEHVDHARKSAHHCIETLLTSQAKAY…
			Brachypodium stacei v1.1 proteome	5	Brast03G305500.1	BstMDAR1	435	Yes	Yes	AKI	No	-	No	-	-	Class III (cyt/per)	MASEKHFKYLVLGGGVAAGYAAREFAKHGLQPGELAIISKESVAPYERPALSKGYLAPQNAARLPGFHTCVGSGGEKLLPEWYTDKGIELILSTEIVKADLATKTLTSADGATFTCEILLIATGSSTIKLTDFGVQGAESNNILYLRDIEDADKLVAAMQAKKDGEAVVVGGGYIGLELGAALKTNNFDVTMVYPEPWCMPRLFTAGIAHFYEGYYASKGINIVKGTVASGFDADANGDVSKVNLKDGRVLDADIVIVGVGGRPLTGLFKGQAEEEKGGLKTDTFFETSVAGVYAIGDVATFPMKLYNEARRVEHVDHARKSAEQAVKAVKAKESGEAAPEYDYLPYFYSRSFEVAWQFYGDNVGDTVLFGDNDPAAPNAKFGTYWVKDGKVIGAFLEG…
					Brast05G220200.1	BstMDAR2	435	Yes	Yes	SKI	No	-	No	-	-	Class III (cyt/per)	MASEKHFKYVIVGGGVSAGYAAREFAKQGVQPGDLAIISKEAVAPYERPALSKAYLFPQSPARLPGFHVCVGSGGERLLPEWYSEKGIELILGTEIVKADLASKTLTSAAGATFTYEILLIATGSSVIKLSDFGTQGADSNNILYLREVDDADKLYAAIQAKKGGKAVVVGGGYIGLELSAVLKMNNLDVTMVYPEPWCMPRLFTADIAAFYESYYANKGVKIVKGTVAIGFDADANGDVTAVKLKDGTVLEADIVVVGVGGRPLTALFKGQVAEEKGGIKTDASFETSVPGVYAVGDVATFPMKIYNDVRRVEHVDHARKSAEQAVKAIKGKESGEAVPAYDYLPYFYSRSFDLSWQFYGDNVGETVLFGDSDPSSAKPKFGSYWIKDGKVLGAFLEG…
					Brast04G090200.1	BstMDAR3	477	Yes	Yes	No	5-24, 449-471	Yes	No	-	-	Class II (per mem)	MGRAFVYVVLGGGVASGYAALEFARRGGYSRGELCIISEEAVAPYERPALSKGYLLPEDPARLPGFHTCVGANDELLTTKWYKEQGIELVLGTKVVSADVRRKTLLTATGETISYKTLIIATGARALKLEEFGISGSDATNICYLRSLADADKLVSAMSSCSGGNAVVIGGGYIGMECAAALVTNKIKVTMVFPENHCMARLFTQKIAEYYESYYTSKGVTFTKGTVLTSFEKEDPTGKVTAVVLKDGKHLPADMVVVGIGIRANTSLFEGQLLMEKGGIKVNGQMQTSDSSVYAIGDVAAFPIKLFDGDIRRLEHVDSARRTARHAVAAILEPSKTRDVDYLPFFYSRVFTLSWQFYGDNVGEVVHYGDFASSSPSFGAYWISKGRITGAFLEGGSRE…
					Brast04G090300.1	BstMDAR4	504	Yes	Yes	No	470-492	No	No	Mit (0.404)	extr: 9, E.R.: 3, chlo: 1	Class II (per mem)	MGRAFTYVILGGGVAAGYAALELVRHRNGVSPGELCIISDEAVAPYERPALSKGYLLPQGAARLPAFHTCVGANDELLTEQWYKEHGIELVLATRVVSADVRRKTLLTATGETISYKTLIVATGARALKLEEFGVSGSDAPNVCYLRNLEDADKMVGVMRSCHGGNAVVIGGGYIGMECAAALVANEIKVTMVFPGKHCMDRLFTPKIAEFYENYYTAKGIAFIKGTAVTSLEVSDGKVTEAILRDGRRLPCDMAVVGIGARANTGLFDGQLATETKRGGIKVDARMRSSDAAVYAAGDVAAFPVALLGGGGLRRFEHVDCARRTARRAAASILQDPAGSDGAAKEEEEIKDKEGFDYLPFFYSRAFALSWQFYGDNAAGDAVVHFGGFSPGPAAPRFG…
					Brast03G012400.1	BstMDAR5	503	Yes	Yes	No	No	-	Yes	Mit (0.942)	chlo: 10, mito: 4	Class I (chl/mit)	MTSALRRKAAQMASTAAAAGSGCRYYSQTSWALRRLGFGGAGLARPAATRRAFSVSAAAGFDNENREYVIVGGGNAAGYAARTFVEHGMADGRLCIVSKEAVPPYERPALTKGYLFPPEKKPARLPGFHTCVGSGGQRQTAEWYKENGIEVLYEDPVEAFDGKTQTLKTSSGKILKYGSLIISTGCAAARLPEKIGGNLPGVHYIRDVADADSLVSSLGKAKKIVVIGGGYIGMEVAAAACGWNLDTTIIFPEDHIMPRLFTPSLAKKYEELYEQNGVKFVKGALIEKLDAGSDGRVSSAVLKDGSVVEADTVIVGIGAKPAVSPFEAVGVNNEVGGIEVDSMFRTSVPGIFAVGDVAAFPLKMYDRIARVEHVDHARKSAHHCIEALLTSQAKAYDYL…
			Oryza sativa v7_JGI proteome	5	LOC_Os08g44340.1 (Os-MDAR2)	OsaMDAR2	435	Yes	Yes	AKV	No	-	No	-	-	Class III (cyt/per)	MAAAKHFTYVILGGGVAAGYAAREFAKQGVKPGELAIISKESVAPYERPALSKGYLFPQNAARLPGFHTCVGSGGERLLPEWYSEKGIELILSTEIVKADLASKTLTSSADATFTYDTLLIATGSSVIKLTDFGVQGAEANDILYLRDIEDADKLVAAMQAKKDGKAVIVGGGYIGLELSAALKTNNFDVTMVYPEPWCMPRLFTSGLAAFYEGYYANKGIHIIKGTVAVGFDADANGDVTAVKLKNGNVLEADIVIVGVGGRPLTHLFKGQVAEEKGGIKTDAFFETSVPGVYAIADVAAFPMKLYNEIRRVEHVDHARKSAEQAVKAIKAKEAGESVPEYDYLPYFYSRSFDLSWQFYGDNVGEDVLFGDNDPTAAKPKFGSYWIKDGKVVGVFLEG…
					LOC_Os09g39380.1 (Os-MDAR3)	OsaMDAR3	447	Yes	Yes	SKI	No	-	No	-	-	Class III (cyt/per)	MASEKHFKYVILGGGVAAGYAAREFAKQGVKPGELAIISKEAVLLLTGTIPVLVVAPYERPALSKGYLFPQNAARLPGFHVCVGSGGERLLPEWYSEKGIELILSTEIVKADLASKTLTSAVGATFTYEILIIATGSSVIKLSDFGTQGADSNNILYLREVDDADKLVAAIQAKKGGKAVIVGGGYIGLELSAALKINDFDVTMVFPEPWCMPRLFTADIAAFYESYYTNKGVKIVKGTVAVGFDADANGDVTAVNLKNGSVLEADIVVVGVGGRPLTTLFKGQVAEEKGGIKTDAFFETSVPGVYAVGDVATFPMKMYNELRRVEHVDHARKSAEQAVKAIKGKESGESVVEYDYLPYFYSRSFDLGWQFYGDNVGDTILFGDSDPTSAKPKFGSYWI…
					LOC_Os02g47800.1 (Os-MDAR4)	OsaMDAR4	476	Yes	Yes	No	448-470	Yes	No	-	-	Class II (per mem)	MGRAFVHVILGGGVAAGYAALEFARRGGYSRGELCIISEETVAPYERPALSKGYLLPEGAARLPGFHTCVGANDELLTAKWYKENGIELVLGTKVITADVRMKTLLTATGETISYKNLIIATGARALKLEEFGISGSDASNICYLRNLDDADKLVNVMKSCPGGNAVVIGGGYIGMECAAALVTNRIKVTMVFPESHCMARLFTPKIAEYYENYYTSKGVTFVKGTVLTSFEKDSTGKVTSVILKDGKHLPADMVVVGIGIRASTGLFEGQLLMEQGGIKVNGQMLTSDGSVYAVGDVAAFPIKLFDGVIRRLEHVDSARRTARHAVAAILEPSKTKDIDYLPFFYSRVFTLSWQFYGNNTGEVVHFGDFTNSSPRFGAYWVDKSRIRGAFLEGGSREE…
					LOC_Os02g47790.1 (Os-MDAR5)	OsaMDAR5	479	Yes	Yes	No	447-469	No	No	Other (0.294)	extr: 7, E.R.: 3, chlo: 2, cyto: 2	Class II (per mem)	MGRAFEYVILGGGVAAGYAALEFVRRNGGASSQELCIISDEHFAPYERPALSKGYLLPQDAPRLPAFHTCVGSKDELLTEEWYNEHGIVLVLGTRVISADVRQKTLLTSSGETISYKTLIVATGARAVKLEEFGVSGSDARNVCYLRNVEDADKLVGVMRSCPGGNAVVVGGGYIGMECAAALVTNNIKVTMVFPKKHCMGRLFTPKIAEFYESYYASRGVTFVKEAAVTSMQISAGKVTAVNLGNGRRLPADMVVVGVGARANTGLFDGQLVMENGGIKVNGRMQASDASVYAVGDVAAFPVKLFGGDVRRLEHVDCARRTARHAVAAMLEGTGSVGHIDYLPFFYSRVFSLSWQFYGDNAGEAVHFGDLAPPGDGDGAAPKFGAYWVRDGRVAGAFL…
					LOC_Os08g05570.3 (Os-MDAR1.1)	OsaMDAR1	491	Yes	Yes	No	No	-	Yes	Chl (0.820)	chlo: 14	Class I (chl/mit)	MASTAAAASSQGCISWALRQRGLGGGGARAVPVLPRRRFCVSAAAGAGFDNENREYVIVGGGNAAGYAARTFVEHGMADGRLCIVSKEAYPPYERPALTKGYLFPPDKKPARLPGFHTCVGSGGQRQTAEWYKENGIEVLYEDPVVAFDGKTHTLKTSSGKILKYGSLIISTGCEASRLPAKIGGNLPGVHYIRDVADADSLVSSLGKAKKIVVIGGGYIGMEVAAAACGWNLDTTIIFPEDHIMPRLFTPSLAKKYEELYQQNGVKFIKGALIDKLEAGSDGRVSSAVLEDGSVVEADTVIVGIGARPVIGPFEAVGVNTKVGGIEVDSLFRTSIPGIFAIGDVAAFPLKMYDRMTRVEHVDHARKSAHHCVEALLTSHTKPYDYLPYFYSRVFEYEG…
			Oropetium thomaeum v1.0 proteome	4	Oropetium_20150105_06349A	OthMDAR1	431	Yes	Yes	SKI	No	-	No	-	-	Class III (cyt/per)	KHFKYVILGGGVSAGYAAREFAKHGVKPGELAIISKDRVAPYERPALSKAYLFPQNPARLPGFHVCVGSGGEKQLPEWYTEKGIELILSTEIVKADLAAKTLTSATGATFTYQILLIATGSTVIKLTDFGTAGAESNNILYLREVADADKLVAAIQAKKGGKAVVIGGGYIGLELSAALKLNDYDVTMVFPEPWCMPRLFTADIAAFYEAYYANKGVKIVKGTLAVGFDANANGDVTAVKLKDGRVVEADIVVVGVGAKPLITLFKGQVTEEKGGIKTDAFFETSVPGVYAIGDVATFPMKMYNELRRVEHVDHARKSAEQAVKAIKSKESGESVPEYEYLPFFYSRSFDLSWQFYGDNVGENIMFGDSDPTAAKPKFGSYWIKDGKVLGAFLEGGSPD…
					Oropetium_20150105_14490A	OthMDAR2	436	Yes	Yes	No	No	-	No	-	-	Class III (cyt/per)	MAAEARHFKYVILGGGVAAGYAAREFGKHGVKPGDLAIVSKEAVAPYERPALSKGYLFPQNAARLPGFHTCVGSGGEKLLPEWYSEKGIELILSTEIIKVDLASKTLTSAAGETFTYETLLIATGSSVIKLTDFGVQGAEYNNILYLRDIQDGEKLVAAMQAKKDGKAVVVGGGYIGLELSAALKMNNFDVTMVYPEPWCMPRLFTAGIAHFYEGYYANKGINLVKGTYAAGFDADANGDVTAVKLKDGRVLEADVVIVGVGGRPLTGLFKGQVAEEKGGIKTDGFFETSVPDVYAIGDVATFPMKLYNDQRRVEHVDHARKSAEQAVRAIKGKESGESIAEYDYLPYFYSRSFDVAWQFYGDNTGDDVFFGDNDPAAAKPKFGSYWVKDGKVVGVFLE…
					Oropetium_20150105_19295A	OthMDAR3	810	Yes	Yes	No	5-24, 778-800	No	No	Mit (0.579)	cyto: 8, chlo: 6	Class II (per mem)	MGRAFVYVILGGGVAAGYAALEFARRGGYSRGELCIISEEAVAPYERPALSKGYLLPEGAARLPGFHTCVGANDELLTTKWYKEQGIELILGTKVISANVRRKTLVTAVGETISYKTLIIATGARVLKLEEFGILGSDADNICYLRNIHDADKLVNAMKSCSGGDAVVIGGGYIGMECAAALVTNKIRVTMVFPEKHCMARLFTPRIAEYYEKYYTSKGVTFVKGTVLTSFEKDTTGKVTAVILKDGKHLPADMVVVGIGIRANTGLFEARRTARHAVAAILEPSKTRDIDYLPFFYSRVFTLSWQFYGDNVGEVVHFGDFTNSSPRFGVYWVNKGRVTGAFLEGGNREEYEAISIAVSRKAKVTNMAELEKQGLAFAIQEGQKQMPDSGLAVGEKPTY…
					Oropetium_20150105_23366A	OthMDAR4	483	Yes	Yes	No	No	-	Yes	Chl (0.854)	chlo: 14	Class I (chl/mit)	MASAAAAQCYSYSSSPATWALRQRGGAGVVRLSPRRSFSVAAAGGRFDNENREYVIVGGGNAAGYAARTFVEHGMADGRLCIVSKEPVPPYERPALTKGYLFPPDKKPARLPGFHTCVGSGGQRQTAEWYKENGIEVLYEDPVVAFDGKTQTLKTSSGKILKYGSLIISTGCEASRLPAKIGGNLDGVHYIRNVTDADSLVSSLGKAKKIVVIGGGYIGMEVAAAACGWNLDTTIIFPEVHVMPRLFTPSLAKKYEELYQQNGVKFVKGALIDKLEAGSDGRVSSAVLKDGSVVEADTVIVGIGAKPAVSPFEAVGVNSQVGGIEVDSLFRTSVPGIFAIGDVAAFPLNMYNRITRVEHVDHARKSAHHCVETLLTSQTKAYDYLPYFYSRVFEYEGSS…
			Panicum hallii v2.0 proteome	6	Pahal.F00378.1	PhaMDAR1	436	Yes	Yes	AKV	No	-	No	-	-	Class III (cyt/per)	MAAEAKHFKYVILGGGVAAGYAAREFGKQGVNPGELAIISKEPVAPYERPALSKGYLFPENAARLPGFHTCVGSGGERLLPEWYSEKGIELILSTEIVKADLASKTLTSAAGATFTYETLLIATGSSVIKLTDFGVQGAESNNILYLRDIADADKLVAAMQAKKDGKVVIVGGGYIGLELSAALKMNNFDVTMVYPEPWCMPRLFTSGIAHFYEGYYSKKGIKIVKGTVAAGFEADANGDVTAVKLKDGRVLEADIVVVGVGGRPLTALFKGQVAEEKGGLKTDAFFETSVPGVYAIGDVATFPLKLYNEQRRVEHVDHARKSAELAVRAIKAKESGESVAEYDYLPYFYSRSFDIAWQFYGDNVGDDVLFGDNDPASANHKFGSYWVKDGKVVGVFLE…
					Pahal.B01907.1	PhaMDAR2	435	Yes	Yes	SKI	No	-	No	-	-	Class III (cyt/per)	MASGKHFKYVILGGGVAAGYAAREFAKQGVQPGELAIISKEAVAPYERPALSKGYLFPQNAARLPGFHVCVGSGGERLLPEWYSEKGIELILSTEIVKADLSTKTLTSAAGAAFTYEILLIATGSLVIKLTDFGTQGADSNNILYLREIDDADKLVAAIQAKKGGKAVVVGGGYIGLELSAALKMNDYDVTMVFPEPWCMPRLFTADIAAFYEAYYTNKGVKILKGTLAIGFDANANGDVTAVKLKDGTVLEADIVVVGVGGRPLTTLFKGQVAEEKGGIKTDAFFETSVPGVYAIGDVATFPLKMYNELRRVEHVDHARKSAEQAVKAIKGKESGESVPEYDYLPYFYSRSFDLAWQFYGDNVGETILFGDSDPTSSKPKFGSYWIKDGKVLGAFLEG…
					Pahal.J01462.1	PhaMDAR3	479	Yes	Yes	No	451-473	Yes	No	-	-	Class II (per mem)	MGRAFTYVILGGGVAAGYAALEFVRRRGDAAPGELCIISEEAVAPYERPALSKGYLLPEGAARLPGFHTCVGANDELLTTKWYKEQGIELVLGTKVISADVRRKTLLTATGETISYKTLIIATGARALKLQEFGIQGSDASNICYLRNIDDADKLVNAMKSCPGGNAVVIGGGYIGMECAAALVTNKIRVTMVFPEKHCMGRLFTEKIAEYYEDYYTSRGVTFVKGTVLTSFERDTTGKVTAVILKDGRHLPADMVVVGIGIRANTSLFEGQLVMSMENGGIKVNGQLQTSDSSVYAVGDVAAFPIKLFDGDIRRLEHVDSARRTARHAVASILEPSKTRDIDYLPFFYSRVFTLSWQFYGDNVGEVVHFGDFTSSSPRFGAYWVNKGRIAGAFLEGGS…
					Pahal.A03098.1	PhaMDAR4	478	Yes	Yes	No	5-24, 450-472	Yes	No	-	-	Class II (per mem)	MGRAFVYVILGGGVAAGYAALEFARRGGYSRGELCIISEEAVAPYERPALSKGYLLPEGAARLPGFHTCVGANDELLTTKWYKEQGIELVLGTKVISADVRRKTLLTATGETISYKTLIIATGARALKLQEFGIQGSDASNICYLRNIDDADKLVNAMKSCPGGNAVVIGGGYIGMECAAALVTNKIRVTMVFPEKHCMGRLFTEKIAEYYEDYYTSRGVTFVKGTVLTSFERDTTGKVTAVILKDGRHLPADMVVVGIGIRANTSLFEGQLVMSMENGGIKVNGQLQTSDSSVYAVGDVAAFPIKLFDGDIRRLEHVDSARRTARHAVASILEPSKTRDIDYLPFFYSRVFTLSWQFYGDNVGEVVHFGDFTSSSPRFGAYWVNKGRIAGAFLEGGSR…
					Pahal.A03096.1	PhaMDAR5	494	Yes	Yes	No	460-482	No	No	Mit (0.512)	extr: 8, E.R.: 2, cyto: 1.5, cyto_nucl: 1.5, chlo: 1	Class II (per mem)	MGRAFTYVILGGGVAAGYAALEFVRRRGDAAPGELCIISEEAVAPYERPALSKGYLLPEGGARLPAFYTCVGANDQLLTPDWYKKHGVELILGTKIISADVRWKTLLASTGETISYKTLIVATGARALKLEEFGGSGSDAENVCYLRDIEDADKLVFRMRSCPGGNAIVIGGGYIGMECAAALVANKIKVTIVFPGKHCMGRLFTPKIAEFYENYYTSKGVTFIKGTAVSSLEISSGKVTTAILRDGRRLPADMVVVGIGARANTALFEGQLVMEKGGIKVNGQMQTSNASVYAVGDVATFPVTLFGGDARRFEHVDCARRTARHAVAAALDPSGPAGDIDYLPFFYSRVFALSWRFYGDNAGEAVHFGDLGFSASSTPKFGAFWVSAAGRIAGAFLEG…
					Pahal.F00968.1	PhaMDAR6	502	Yes	Yes	No	No	-	Yes	Chl (0.334)	chlo: 9, mito: 5	Class I (chl/mit)	MTSALRRKAAEMASAAAAAQCFSSYSSFPGTWALRQRGGARVLQLSSRRSFCVSAAADGFDNQNREYVIVGGGNAAGYAARTFVQHGMADGRLCIVSKEPVPPYERPALTKGYLFPPEKKPARLPGFHTCVGSGGERQTAEWYKENGIEVLYEDPVVAFDGKTQTLKTSSGKILKYGSLIISTGCEASRLPEKIGGKLPGVHYIRDVADADSLVSSLGSAKKVLVIGGGYIGMEVAAAACGWNLDTTIVFPEDHIMPRLFTPSLAKKYEDLYQQNGVKFIKGALIDKLEAGSDGRVSSAVLKDGSVVEADTVIVGIGAKPVVGPFEAVGVNPEVGGIEVDSLFRTSVPGIFAIGDVAAFPLKMYNRIARVEHVDHARKSAHHCVETLLTSQTKAYDYLP…
			Setaria italica v2.2 proteome	5	Seita.6G244300.1	SitMDAR1	436	Yes	Yes	AKV	No	-	No	-	-	Class III (cyt/per)	MAAEARHFKYVVLGGGVAAGYAAREFAKQGVNPGELAIISKEPVAPYERPALSKGYLFPQNAARLPGFHTCVGSGGERLLPEWYSEKGIELILSTEIVKVDLASKTLTSAAGATFTYEILLIATGSSVIKLTDFGVQGAESNNILYLRDIADAEKLVAAMQAKKDGKAVIVGGGYIGLELSAALKINNFDVTMVYPEPWCMPRLFTSGIAHFYEGYYANKGIKIVKGTVAVGFDADANGDVTAVKLKDGRVLEADIVIVGVGGRPLTALFKGQVADEKGGLKTDAFFETSVPGVYAIGDVATFPLKLYNEQRRVEHVDHARKSAEQAVRAIKAKESGESVPEYDYLPYFYSRSFDVAWQFYGDNVGDDVLFGDNDPASAKPKFGSYWVKDGKVVGVFLE…
					Seita.2G132500.1	SitMDAR2	435	Yes	Yes	SKI	No	-	No	-	-	Class III (cyt/per)	MASGKHFKYVILGGGVAAGYAAREFAKQGVKPGELAVISKEAVAPYERPALSKGYLFPQNAARLPGFHVCVGSGGERQLPEWYTEKGIELILSTEIVKADLSTKTLTSAAGATFTYEILLIATGSSVIKLTDFGTQGADSNNILYLREIDDADKLVAAIQAKKGGKAVVIGGGYIGLEISAALKINDFDVTMVFPEPWCMPRLFTADIAAFYEAYYTNKGVKILKGTLAVGFDANANGDVTAVKLKDGTVLEADIVVVGVGARPLTTLFKGQVAEEKGGIKTDAFFETSVPGVYAIGDVATFPLKMYNELRRVEHVDHSRKSAEQAVKAIKGKESGESVPEYDYLPYFYSRSFDLGWQFYGDNVGETILFGDSDPASSKPKFGSYWIKDGKVLGAFLEG…
					Seita.1G290400.1	SitMDAR3	478	Yes	Yes	No	5-24, 450-472	Yes	No	-	-	Class II (per mem)	MGRAFVYVILGGGVAAGYAALEFARRGGYSRGELCIISEEAAAPYERPALSKGYLLPEGASRLPGFHTCVGANDELLTTKWYEEQGIELVLGTKVISADVRRKTLLTGTGETISYKTLIIATGARALKLQEFGIQGSDASNICYLRNVDDADKLVNAMKSCPGGNAVVIGGGYIGMECAAALVTNKIRVTMVFPEKHCMGRLFTPKIAEYYENYYTSKGVTFVKGTVLTSFEKDTTGKVTAVILKDGRHLPADMVVIGIGIRANTSLFEGQLVMSMENGGIKVNGQLQTSDSSVYAVGDVAAFPIKLFDGDIRRLEHVDSARRTARHAVASILEASKARDIDYLPFFYSRVFTLSWQFYGDNVGEVVHFGDFTSSSPRFGAYWVNKGRIAGAFLEGGSR…
					Seita.1G290300.1	SitMDAR4	494	Yes	Yes	No	461-483	No	No	Mit (0.452)	extr: 8, vacu: 2, cyto: 1.5, cyto_nucl: 1.5, chlo: 1	Class II (per mem)	MSRAFTYVILGGGVAAGYAALEFVRRRGDAALGELCIISEEAVAPYERPALSKGYLLPEGGARLPAFHTCVGANDQLLTAEWYREHGIELILGTKVISADVRRKTLVTSIGKTINYKTLIVATGARASKLEEFGVSGSDAENVCYLRNIVDADKLVRVMRSSPGGNAIVIGGGYIGMECAAALVANKIKVTIVFPGKYCMDRLFTQKIAEFYENYYTSKGVTFIKGTAVSSLEVSSGMVTTAILRDGRPLPADMVVVGIGARANTALFEGQLTLEKGGIKVNGQMQTSDASVYAVGDVAAFPVKLFGGDARRLEHVDCARRTARHAVAAVLDPTGAAGDIDYLPFFYSRVFALSWRFYGDNAGEAVHFGDLGFSSASSTPKFGAFWVSSGRIAGAFLEG…
					Seita.6G062500.1	SitMDAR5	505	Yes	Yes	No	No	-	Yes	Chl (0.466)	chlo: 9, mito: 4	Class I (chl/mit)	MTSALRRKAAEMASAAAAAAQCFSSYSSSPAAWALRQRGGSGARVLQLSLRRSFCVSAAAGGFDNQNREYVIVGGGNAAGYAARTFVEHGMADGRLCIVSKEPVPPYERPALTKGYLFPPEKKPARLPGFHTCVGSGGQRQTAEWYKENGIEVLYEDPVVAFDGKTQTLKTSSGKILKYGSLIISTGCEASRLPEKIGGKLPGVHYIRDVADADSLVSSLGSAKKVLIIGGGYIGMEVAAAACGWNLDTTIVFPEDHVMPRLFTPSLAKKYEDLYQQNGVKFIKGALIDKLEAGSDGRVSSAVLKDGSVVEADTVIVGIGAKPVVGPFEAVGVNPKVGGIEVDSLFRTSVPGIFAIGDVAAFPLKMYNRIARVEHVDHARKSAHHCVETLLTSQTKAYD…
			Setaria viridis v1.1 proteome	5	Sevir.6G250100.1	SviMDAR1	436	Yes	Yes	AKV	No	-	No	-	-	Class III (cyt/per)	MAAEARHFKYVVLGGGVAAGYAAREFAKQGVNPGELAIISKEPVAPYERPALSKGYLFPQNAARLPGFHTCVGSGGERLLPEWYSEKGIELILSTEIVKVDLASKTLTSAAGATFTYEILLIATGSSVIKLTDFGVQGAESNNILYLRDIADAEKLVAAMQAKKDGKAVIVGGGYIGLELSAALKINNFDVTMVYPEPWCMPRLFTSGIAHFYEGYYANKGIKIVKGTVAVGFDADANGDVTAVKLKDGRVLEADIVIVGVGGRPLTALFKGQVADEKGGLKTDAFFETSVPGVYAIGDVATFPLKLYNEQRRVEHVDHARKSAEQAVRAIKAKESGESVPEYDYLPYFYSRSFDVAWQFYGDNVGDDVLFGDNDPASAKPKFGSYWVKDGKVVGVFLE…
					Sevir.2G138000.1	SviMDAR2	435	Yes	Yes	SKI	No	-	No	-	-	Class III (cyt/per)	MASGKHFKYVILGGGVAAGYAAREFAKQGVKPGELAVISKEAVAPYERPALSKGYLFPQNAARLPGFHVCVGSGGERQLPEWYTEKGIELILSTEIVKADLSTKTLTSAAGATFTYEILLIATGSSVIKLTDFGTQGADSNNILYLREIDDADKLVAAIQAKKGGKAVVIGGGYIGLEISAALKINDFDVTMVFPEPWCMPRLFTADIAAFYEAYYTNKGVKILKGTLAVGFDANANGDVTAVKLKDGTVLEADIVVVGVGARPLTTLFKGQVAEEKGGIKTDAFFETSVPGVYAIGDVATFPLKMYNELRRVEHVDHSRKSAEQAVKAIKGKESGESVPEYDYLPYFYSRSFDLGWQFYGDNVGETILFGDSDPASSKPKFGSYWIKDGKVLGAFLEG…
					Sevir.1G295400.1	SviMDAR3	478	Yes	Yes	No	5-24, 450-472	Yes	No	-	-	Class II (per mem)	MGRAFVYVILGGGVAAGYAALEFARRGGYSRGELCIISEEAAAPYERPALSKGYLLPEGASRLPGFHTCVGANDELLTTKWYEEQGIELVLGTKVISADVRRKTLLTGTGETISYKTLIIATGARALKLQEFGIQGSDASNICYLRNVDDADKLVNAMKSCPGGNAVVIGGGYIGMECAAALVTNKIRVTMVFPEKHCMGRLFTPKIAEYYENYYTSKGVTFVKGTVLTSFEKDTTGKVTAVILKDGRHLPADMVVIGIGIRANTSLFEGQLVMSMENGGIKVNGQLQTSDSSVYAVGDVAAFPIKLFDGDIRRLEHVDSARRTARHAVASILEASKARDIDYLPFFYSRVFTLSWQFYGDNVGEVVHFGDFTSSSPRFGAYWVNKGRIAGAFLEGGSR…
					Sevir.1G295300.1	SviMDAR4	494	Yes	Yes	No	461-483	No	No	Mit (0.508)	extr: 7, cyto: 2.5, vacu: 2, cyto_nucl: 2, chlo: 1	Class II (per mem)	MGRAFTYVILGGGVAAGYAALEFVRRRGDAALGELCIISEEAVAPYERPALSKGYLLPEGGARLPAFHTCVGANDQLLTAEWYREHGIELILGTKVISADVRRKTLVTSIEETINYKTLIVATGARASKLEEFGVSGSDAENVCYLRNIVDADKLVRVMRSSPGGNAIVIGGGYIGMECAAALVANKIKVTIVFPGKYCMDRLFTQKIAEFYENYYTSKGVTFIKGTAVSSLEVSSGMVTTAILRDGRPLPADMVVVGIGARANTALFEGQLTLEKGGIKVNGQMQTSDASVYAVGDVAAFPVKLFGGDARRLEHVDCARRTARHAVAAVLDPTGAAGDIDYLPFFYSRVFALSWRFYGDNAGEAVHFGDLGFSSASSTPKFGAFWVSSGRIAGAFLEG…
					Sevir.6G060300.1	SviMDAR5	505	Yes	Yes	No	No	-	Yes	Chl (0.483)	chlo: 9, mito: 4	Class I (chl/mit)	MTSALRRKAAEMASAAAAAAQCFSSYSSSPAAWALRQRGGSGARVLQRSLRRSFCVSAAAGGFDNQNREYVIVGGGNAAGYAARTFVEHGMADGRLCIVSKEPVPPYERPALTKGYLFPPEKKPARLPGFHTCVGSGGQRQTAEWYKENGIEVLYEDPVVAFDGKTQTLKTSSGKILKYGSLIISTGCEASRLPEKIGGKLPGVHYIRDVADADSLVSSLGSAKKVLIIGGGYIGMEVAAAACGWNLDTTIVFPEDHVMPRLFTPSLAKKYEDLYQQNGVKFIKGALIDKLEAGSDGRVSSAVLKDGSVVEADTVIVGIGAKPVVGPFEAVGVNPKVGGIEVDSLFRTSVPGIFGIGDVAAFPLKMYNRIARVEHVDHARKSAHHCVETLLTSQTKAYD…
			Sorghum bicolor v3.1.1 proteome	5	Sobic.002G133800.1	SbiMDAR1	435	Yes	Yes	SKI	No	-	No	-	-	Class III (cyt/per)	MASEKHFKYVILGGGVAAGYAAREFAKQGVKPGELAIISKEAVAPYERPALSKGYLFPQNAARLPGFYVCVGSGGERLLPEWYSEKGIELILSTEIVKADLSTKTLTSAAGANFTYEILLIATGSSVIKLTDFGTPGADSNNILYLREIDDADKLVAAIQAKKGGKAVVVGGGYIGLELSAALKINDFDVTMVFPEPWCMPRLFTADIAAFYEAYYTNKGVKVLKGTLAVGFDADANGDVTAVKLKDGTVLEADIVVVGVGGRPLTTLFKGQVAEEKGGIKTDAFFETSVPGVYAIGDVATFPLKMYNELRRVEHVDHSRKSAEQAVKAIKGKESGEPVPEYDYLPYFYSRSFDLGWQFYGDNVGETILFGDSDPTSSKPKFGSYWIKDGKVLGAFLEG…
					Sobic.007G171000.1	SbiMDAR2	433	Yes	Yes	AKI	No	-	No	-	-	Class III (cyt/per)	MAKHFKYVILGGGVAAGYAAREFAKQGVNPGELAIISKEPVAPYERPALSKGYLFPQNAARLPGFHTCVGSGGERLLPEWYSEKGIELVLSTEIVKADLASKTLTSAAGDTFTYETLLIATGSSVIKLTDFGVQGAESNNILYLRDIADADKLVAAMQAKKDGKAVIVGGGYIGLELSAALKINNFDVTMVYPEPWCMPRLFTAGIAHFYEGYYTNKGIKILKGTVAVGFDADANGDVTKVKLKNGSVLDADIVIVGVGGRPLTGLFKRQVDEEKGGLKTDAFFETSVAGVYAIGDVATFPLKLYNEQRRVEHVDHARKSAEQAVRAIKAKESGESVAEYDYLPYFYSRSFDVAWQFYGDNVGDDVLFGDNDPASAKPKFGSYWVKDGKVVGVFLEGGS…
					Sobic.004G266400.1	SbiMDAR3	476	Yes	Yes	No	5-24, 448-470	Yes	No	-	-	Class II (per mem)	MGRAFVYVILGGGVAAGYAVLEFARRGGYSRGELCIISEEAVAPYERPALSKGYLLPEGAARLPGFHTCVGANDELLTTKWYKEQGIELVLGTKVISADVRRKTLLTGTGETISYKTLIIATGARALKLQEFGIQGSDASNICYLRNIDDADKLVSAMKSCPGGNAVVIGGGYIGMECAAALVTNKIRVTMVFPEKHCMGRLFTPKIAEFYENYYTSKGVTFVKGTVLTSFEKDTTGKVTAVILKDGRHLPADMVVVGIGIRANTSLFEGQLMMENGGIKVNGQLQTSDSSVYAVGDVAAFPIKLFDGDIRRLEHVDSARRTARHAVASILEPSKNKDIDYLPFFYSRVFTLSWQFYGDNVGEVVHFGDFTSSSPRFGAYWVNKGRIAGAFLEGGSREE…
					Sobic.004G266500.2	SbiMDAR4	491	Yes	Yes	No	459-481	No	No	SP (0.525)	chlo: 7, cyto: 7	Class II (per mem)	MGRAFAYVILGGGVAAGYAALEFVRLRTDGAAGELCIISDEAVAPYERPALSKGYLFPEGAARLPAFHTCVGANDQLLTADWYKEHGIELILGTKVTSVDVRGKTLDTSTGETISYATLIVATGAQALKLEEIGGNGSDAENVCYLRNIEDADKLVRVMRSCPGGDAVVIGGGYIGMECAAALVANNIKVTIVFPGKHCMENLFTPKIAEFYENYYASKGVTFIKGTVVSSLEISSGKVTTAILRDGRRLPADMVVVGIGARANTELFQGKLAMEKRGIKVNEQMRTSDASVYAVGDVAAFPVKLLGGEVRRLEHVDCARRTARHAVAAALDPSGATGDIDYLPFFYSRVFALSWRFYGDNAGEAVHFGDLGFSASSPSTPKFGAIWVSAGRIAGAFLE…
					Sobic.007G038600.1	SbiMDAR5	504	Yes	Yes	No	No	-	Yes	Mit (0.630)	chlo: 14	Class I (chl/mit)	MTSALRQKAAQMASAAAQCFSYSSSPATWAMRQRGGGGAGAGAGVLRLSSRRTFSVSAAAGFDNQNREYVIVGGGNAAGYAARTFVEHGMADGRLCIVSKEPVPPYERPALTKGYLFPPDKKPARLPGFHTCVGSGGQRQTAEWYKENGIEVLYEDPVVAFDGKTQTLKTSSGKILKYGSLIISTGCEASRLPEKIGGTLPGVHYIRDVADADSLVSSLGSAKKVVVIGGGYIGMEVAAAACGWNLDTTIIFPEDHIMPRLFTPSLAKKYEELYQQNGVKFIKGALIDKLEAGSDGRVSSAVLKDGSVVEADTVIVGIGAKPVVSPFEAVGVSAEVGGIEVDSLFRTSVPGIFAIGDVAAFPLKMYDRVARVEHVDHARKSAHHCVETLLTSQTKAYDY…
			Zea mays PH207 v1.1 proteome	4	Zm00008a015879_T01	ZmayMDAR1	433	Yes	Yes	SKI	No	-	No	-	-	Class III (cyt/per)	MARHFKYVILGGGVAAGYAAREFAKQGVNPGELAIISKEPVAPYERPALSKGYLFPQNAARLPGFHTCVGSGGERLLPEWYSEKGIELILSTEIVKADLASKTLTSAAAETFTYETLLIATGSSVIKLTDFGVQGAESNNILYLRDIADADKLVAAMQAKKGGKAVIVGGGYIGLELSAALKINNFDVTMVYPEPWCMPRLFTAGIAHFYEGYYANKGIKVVKGTVAVGFDADANGDVTTVKLKNGSVLEADIVIVGVGGRPLTRLFIGQAADEKGGLKTDAFFETSVAGVYAIGDVATFPLKLYNEQRRVEHVDHARKSAEQAVRAIKAKESGESVAEYDYLPYFYSRSFDLAWQFYGDNVGDDVLFGDNDPASAKPKFGSYWVKDGKVVGVFLEGGS…
					Zm00008a008601_T01	ZmayMDAR2	435	Yes	Yes	SKI	No	-	No	-	-	Class III (cyt/per)	MASEKHFKYVILGGGVAAGYAAREFAKQGVKPGELAIISKEAVAPYERPALSKGYLFPTNAARLPGFYVCVGSGGEKLLPEWYSEKGIELILSTEIVKADLSTKTLTSAAGANFTYEILLIATGSSVIKLTDFGTQGADSNNILYLREIDDADKLVAAIQAKKGGKAVVVGGGYIGLELSAALKINDFDVTMVFPEPWCMPRLFTADIAAFYEAYYTNKGVKILKGTLAVGFDADANGDVTAVKLKDGTVLEADIVVVGVGGRPLTTLFKGQVAEEKGGIKTDASFETSVPGVYAIGDVATFPLKMYNELRRVEHVDHSRKSAEQAVKAIKGKESGEPVPEYDYLPYFYSRSFDLAWQFYGDNVGETILFGDSDPTSSKPKFGSYWIKDGKVLGAFLEG…
					Zm00008a022775_T01	ZmayMDAR3	989	Yes	Yes	No	5-24, 441-463, 492-514, 955-977	No	No	Mit (0.656)	chlo: 9, cyto: 4	Class II (per mem)	MGRAFVYVILGGGVAAGYAALEFARRGGYSRGELCIISEEAVAPYERPALSKGYLLPEGAARLPGFHTCVGANDELLTPKWYKEQVISADVRRKTLLTGTGETISYKTLIIATGARALKLQEFGIQGSDASNICYLRNIDDADKLVSVMKSCPGGNAVVIGGGYIGMECAAALVTNKIRVTMVFPEKHCMGRLFTPKIAEFYENYYTSKGVTFVKGTVLTSFEKDTTGKVTAVILKDGRHLPADMVVVGIGIRANTSLFEGQLMMSTENGGIKVNGQLQTSDSSVYAVGDVAAFPIKLFDDDIRRLEHVDSARRTGRHAVASILDPSKTRDIDYLPFFYSRVFTLSWQFYGDNVGEVVHFGDFTSSSPRFGAYWVNKGRIAGAFLEGGSREEYEAISIA…
					Zm00008a037332_T01	ZmayMDAR4	472	Yes	Yes	No	No	-	Yes	Mit (0.764)	chlo: 13	Class I (chl/mit)	MTSALRRKAAQMASAATQCFSYSSLPATWALRQRGGGASVLRLSSRRTFSVSAAAGFDNQNREYVIVGGGNAAGYAARTFVEHGMADGRLCIVSKEPVPPYERPALTKGYLFPPDKKPARLPGFHTCVGSGGQRQTAEWYKENGIEVLYEDPVVAFDGKTQTLKTSSGKVLKYGSLIISTGCEASRLPEKIGGKLPGVHYIRDVADADALVSSLGSAKKVVVIGGGYIGMEVAAAACGWNLDTTIIFPEDHIMPRLFTPSLAKKYEELYQQNGVKFIKGALIEKLGAGSDGRVSSAVLKDGSVVEADTVDSLFRTSVPGIFAIGDVAAFPLKMYNRIARVEHVDHARKSAHHCIETLLTSQTKAYDYLPYFYSRVFEYEGSSRKVWWQFYGDNVGEAVE…
	Eudicots	Ranunculaceae	Aquilegia coerulea v3.1 proteome	3	Aqcoe2G131500.1	AcoeMDAR1	474	Yes	Yes	SKF	No	-	obscure	Other (0.361)	chlo: 10, mito: 3	Class III (cyt/per)	MNTTTSTANSVFHCTKVFSRNFCKFTQIRSNNINLNLFMAAEDKSFKYVILGGGVSAGYAARQFTKEGVKPGELAIISKEAVAPYERPALSKAYLFPESPARLPGFHTCVGSGGERQLPEWYTEKGIELLLETEIVEADLASKSLTSAAGATIKYDSLIIATGSTVIRLSDFGVQGADAKNIFYLREIDDADKLNETIKGKKGGKAVIVGGGYIGLELGAVLKLNDLDVTMVYPEPWCMPRLFTSGIAAFYEGYYKNKGIQIVKGTVATGFDSNENGEVKAVKLKDGRVLDADIVVVGVGGRPLVSLFKGQVEEAKGGIKTDASFKTDVPNVYAVGDVATFPMKLYNELRRVEHVDHARKSAEQAVKALKASEEGKTIDEYDYLPYFYSRSFNLSWQFY…
					Aqcoe1G452000.1	AcoeMDAR2	431	Yes	Yes	CKI	No	-	No	-	-	Class III (cyt/per)	MDFKYVILGGGVSAGYAAREFVKQGVKPGELAIISKEAVAPYERPALSKAYLFPEAPARLPGFHVCVGSGGERLLPEWYSEKGIELILSTEIVKVDLASNTLTSAAGTTFKFDTLIVATGSAVIKLTDFGVQGAGSKNIFYLREIDDADELIEAIKAKKDGKAVIVGGGYIGLELAAVMKINNYNVTMVYPEPWCMPRLFTPEIAAFYEGYYANKGISIIKGTVAAGFEANANGEVTAVKLKDGRVLDADIVVVGVGARPLTTLLKGQVEEDKGGIKTDAFFKSSVPNVYAVGDVATFPMKMYNEIRRVEHVDHARKSAEQAVKAIKASEGGKTVDQYDYLPFFYSRSFDLSWQFYGDNVGEAVLFGDSSPTSPKPKFGSYWIKDGKVVGAFLESGTPE…
					Aqcoe3G287900.1	AcoeMDAR3	480	Yes	Yes	No	451-473	Yes	No	-	-	Class II (per mem)	MGRAFVYVILGGGVAAGYAALEFSKRGVSNGELCIISEEPVVPYERPALSKGFLLPEAPARLPAFHTCVGANEERLTPKWYKEHGIELVLGTRVKSADVKRKTLLTATGETISYKILIIATGARALQLEEFGVNGSNAENVCYLRSLADATRLVEVMKSSTGGNAVVIGGGYIGMECAASLVTNKINVTMVFPEAHCMARLFTPKIASYYEDFYKSKGVKFIKGTVLSSFEKDADEKVTAVVLKDKNHLPTDMVVVGIGIRPNTSLFEGQLTLEKGGIKVNGMMQTSNTSVFAVGDVAAFPVKIFGEIRRLEHVDSARKSARHAVAAIMDPSRTFDFDYLPFFYSRIFSLSWQFYGESVGEVVHYGDFSGSTFGGYWVSKGYLVGSFLEGGTKEEYEAI…
		Amaranthaceae	Amaranthus hypochondriacus v1.0 proteome	3	AHYPO_000684-RA	AhyMDAR1	434	Yes	Yes	SRI	No	-	No	-	-	Class III (cyt/per)	MAEKHFKYVILGGGVSAGYAAREFVKQGLQPGELAIISKEAVAPYERPALSKAYLFPEGTARLPGFHTCVGSGGERLLPDWYKEKGIELVLSTEIVKADIFSKSLTSAAGDIFKFDILIIATGSTVIRLTDFGVQGADAQNIFYLREIDDADKLVEAIKAKKNGKAIVVGGGYIGLELSAALRINNLDVTMVYPEPWCMPRLFTADIAKFYEGYYANKGIKIIKGTVATGFTSNDKGEVKEVQLKDGRVLEADIVIVGVGGRPLTALFKGQVQEEKGGIKTDAFFKTNVADVYAVGDVATFPMKIYGDIRRVEHVDHARKSAEQAVKAIKASEEGKSIEEYDYLPYFYSRSFDLSWQFYGDNVGETVLFGDNDPTSSTHKFGTYWIKDGKVVGAFLESG…
					AHYPO_008537-RA	AhyMDAR2	482	Yes	Yes	No	454-476	Yes	No	-	-	Class II (per mem)	MGRAFVYVILGGGVAAGYAALEFTKKGVSPGELCIISQESVAPYERPALSKGFLLPEAPARLPSFHTCVGLNEERLTTKWYNEHGIELVLGTRVKSVDVKRKTLLTATGETISYKILIIATGARALKLEEFGVNVSDAKNVCYLRDLADASKLSQVMQSCVGGNAVVIGGGYIGMECAASLVINKINVTMIFPEAHCMPRLFTTKIADYYEDYYKDKGVKFVKGTVLTSFEFDSSGKVTAVNLKDGTRVPADLVVVGIGIRPNTSLFEGQLSIEKGGIKVNGKMQTSNSSVYAVGDVAAFPVKLFGEIRRLEHVDSARRTAKHAVSAIMEPQKTDDFDYLPFFYSRVFGLSWQFYGDNTGEIVHFGDYTGKSFGAYWVKDSHLVGSFLEGGDKEEYKAL…
					AHYPO_004895-RA	AhyMDAR3	496	Yes	Yes	No	No	-	Yes	Chl (0.888)	chlo: 10, mito: 4	Class I (chl/mit)	MAATIYNSLSLKHGFSLYSSSNSLTISQLNCTPSFLASRSFTNTRRFSIAASSFANENREYVIVGGGNAAGYAAKTFVENGFADGKLCIVTKEAYAPYERPALTKGYLFPLDKKPARLPGFHTCVGSGGERQTPEWYQEKGIEMIYEDPVTNIDIDKHTLQTQSGKSLKYGSLIIATGCTATRFPEKIGGNLPGVHYIRDVADADSLIESLKNAKKVVVVGGGYIGMEVAAAAVGWNLDTTVIFPEDHLLQRLFTPSLARKYEELYEQNGVKFVKGGMIKNLEAGSDGRVAAVKLENGFTIEADAIVIGIGAKPAVGPFEKVGLDTTVGGIQVDGLFRTKVPGIFAIGDVAAFPLKMYDRVARVEHVDHARKSAQHCVSALLTARTSPTYDYLPYFYSR…
		Apiaceae	Daucus carota v2.0 proteome	4	DCAR_020770	DcaMDAR1	434	Yes	Yes	SKI	No	-	No	-	-	Class III (cyt/per)	MAEKSFKYVIIGGGVSAGYAAREFANQGVKKGELAIITKEAVAPYERPALSKGYLFPEGAARLPGFHTCVGSGGEKLLPEWYAGKGITLFLSTDIVKADLASKTLVSAAGDTFKYESLIIATGSTVLRLTDFGVQGADSKNILYLREIDDADKLVETIKAKKNGKVVIVGGGYIGLELSAVMKLNNLDVTMVYPEPWCMPRLFTADIAAFYEEYYKNKGVKIIKGTVAVGFNSNDNGEVKEVKLKDGRVLEADIVVVGVGARPLTTLFKGQVEEDKGGIKADAFFKTSVANVYAVGDVATFPMKMYNDIRRVEHVDHARKSAEQAVKAIFASEQGKTIEEYDYLPMFYSRSFNLSWQFYGDNVGDAVIFGDNSPKSDNPKFGSYWIKDGKVVGAFLEGG…
					DCAR_009150	DcaMDAR2	440	Yes	Yes	No	No	-	No	-	-	Class III (cyt/per)	MEEKSFKYVIIGGGVSAGYAAREFVNQGVKHGELAIISKEAVAPYERPALSKGYMFPEGAARLPGFHTCVGSGGEKLLPEWYTDKGITLILSTEIVKADLASKTLVSADRETFKYEILVIATGSTVLRLTDFGVQGADSKNILYLREINDADKIVEVTKAKKKGKVVIVGGGYIGLELSAVMKLNHMDVTMVYPESWCMPRLFTADIASFYEEYYTNKGVHIIKGTVAVGFNINDHREVKAVKLKDGRVLEADIVVVGVGARPLMALFKGQVEEDKGGIKTDSFFKTSVDGVYAVGDVATFPMKMYNDIRRVEHVDHARKSAEQAVKAIYASQQGKTIDEYDYLPFFYSRSFDLTWQFYGDNVGDAVIFGNKNPISQNPKFGAYWVKDGKVVGTFLEGG…
					DCAR_015054	DcaMDAR3	478	Yes	Yes	No	449-471	Yes	No	-	-	Class II (per mem)	MGRAFVYVILGGGVAAGYAALEFTRKGVSSGELCIISQESVAPYERPALSKGFLLPEDPARLPSFHTCVGANEERLTPKWYKEHGIELVLGTRVKSADVRRKTLLTATGETISYKFLIIATGARALKLEEFGVSGSDAENVCYLRDLADATRLVSVMQSSAGGNAIVIGGGYIGMECAASLVINKINATMVFPEAQCMARLFTPKIAGHYEDYYISKGVQFVKGTVLSSFEFNSEGKVTGVNLRDGSQLAADMVVVGIGIRPNTSLFEGQLTLEKGGIKVNGHMQSSNSSVYAVGDVACFPVKLFGETRRLEHVDSARKSARHAVAAIMEPSKTLEFDYLPFFYSRVFSLSWQFYGDNAGEAIHFGDFSGTTFGAYWVSKGHLVGSFLEGGTKEQYEAL…
					DCAR_005569	DcaMDAR4	486	Yes	Yes	No	No	-	Yes	Chl (0.816)	chlo: 9.5, chlo_mito: 7.5, mito: 4.5	Class I (chl/mit)	MANSLSIKHGLSLWCPQSVSANRVSRPNCFAPLPTTRRSYVVASASFANENREFVIVGGGNAAGYAARSFVEHGMANGKLCIVSKEAVAPYERPALTKAYLFPHDKKPARLPGFHTCVGGGGERQTPDWYKDQGIEMLYQDPVTGIDIEKQTLTTNSGKILKYGSLIISTGCTASRFPEKIGGNLAGVHYIRDVSDADSLISSLEKSQKVVVVGGGYIGMEVAAAAVAWKLDTTVVFPESHLLPRLFTPSLAGRYEELFEKNGVKFVKGASIKTLEAGIDGQVTAVKLEDGSLIEADTVVIGIGAKPAVSPFESVGLNSTVGGIQVDGQFRTSVPGIFAIGDVAAFPLKIYDRVARVEHVDHARRSAQHCINSLLSAQTHNYDYLPYFYSRVFEYEGSS…
					DCAR_013373	DcaMDAR-like	433	No									MAEKYFKYVILGGGVSAGYAVREFVNQGVKPGELAIISKESVAPYERPALSKAYFFPQGPARLPGFHVCAGTGGDILLPEWYSAKGISLILSTEIVKADLASKTLTSANGDMFKYQILIIATGSTATKLTDHGVPGADAKNIFYLRDIEEAETLAKAIKAENRKVVIVGGGYIGLELSAVMKINNLDVTMVYPGPWCMPRLFTAELASFYEGYYASKGVQIIKGTAAAGFNSDTNGDVKEVKLKNERVLEADIVVVGVGGRPLTTLFKGQLEEDKGGFKTDAFFKTSVPEVYAVGDVASFPMKLYNDTRRVEHVDHAHKSAEQAVKGIFASEQGKLIDEYDYLPYFYSRAFDLSWQFYGDNVGEAVLFGDNNPASENPKFGSYWIKDGKVMGVFLENGS…
		Phrymaceae	Mimulus guttatus v2.0 proteome	4	Migut.J00970.1	MguMDAR1	400	Yes	Yes	SKI	No	-	No	-	-	Class III (cyt/per)	MLNDGLVVEPNERPALSEAYLSPEGTARLPGFHVCVGSGGERLLPEWYTEKGISLILSTEIVKADLPTKTLISAAGDTFTYQILIIATGSAVIQLTDFGVKGADAKNIFYLREIDDADKLVEVIKAKSNGKAVIVGGGYIGLELSAALRVNNIDVKMVYPEPWCMPRLFTAGIAAFYESYYTNKGVDIIKGTVAVGFGTNENGEVTNVNLKDGRVLEADIVVVGVGGRPLTTLFKGQVEEEKGGIKTDAFFKTSLPDVYAVGDVATFPLKLFNEVRRVEHVDHARKSAEQAVKAIFASEKGTSIEEYDYLPYFYSRAFDLSWQFYGDNVGDSVLFGDSSPTSATHKFGSYWIKDGKVVGVFLESGTPEENKAIAKVARVQPPVDSLESLAAEGLAFASKI
					Migut.K01379.1	MguMDAR2	491	Yes	Yes	No	462-484	Yes	No	-	-	Class II (per mem)	MGRAFVYVIIGGGVAGGYAAHEFVKRGVSQGELCIISEETVAPYERPALSKGYLLPEDPARLPSFHCCVGSNEERLAPKWYKENGIELILGTRVKSADVRRKTLLTATGETISYKYLIIATGARALKLEEFGVNALDATNVCYLRDLADADRLVDVIQSSSGGNAVVIGGGYIGMECAASLVINKLNVTMVFPEAQCMARLFTPKIANYYEEFYQSKGIKFIKGTVLTSFDFNSDGKVTAVNLRDGTKLPADLVVIGIGIRPNTSLFEGQLTMEKGGIKVNGKMQSSNASVYAVGDVAAFPVRIVSDTRRLEHVDSARKSARHAVSAIVDPTNTGEFDYLPFFYSRVFTLSWQFYGDNSGEAVHFGEFDKTTFGAYWVNNGVLVGSFLEGGTKEQYEAM…
					Migut.H00103.1	MguMDAR3	471	Yes	Yes	No	443-465	Yes	No	-	-	Class II (per mem)	MARAFLYAIVGGGVAAGYAADEFVKRGVSRGDLCIISEEPVAPYERPALSKGYLNPEAPARLPSFHCCVGTNGERLAPEWYKEHGIELFLGTRVISADVTRKTLLIATGETIIYKYLIVATGARALKLEEFGINGSDAANVCYLRDLADAEKLVKVMQSCTGKTAVVIGGGYIGMECAASLVINNLNVTMVFPDSHCMSRLFTPKIARYYEEFYQSKGVKFIKGTALTSFDFNSDGKVTAVNLKNGSKVPTDMVVIGIGARPNTALFEGQLTMEKGGIKVNSIFQSSNTSLFAIGDVAAFPVVTVAGETTTTRLEHVDFARKSARHAVAAIMNPEKTNEFDYLPFFYSRVFTLSWQFYGVNEGEVVHFGDFSGKTLGAYWVYKGRLVGSFLEGGTKEQY…
					Migut.A00725.1	MguMDAR4	492	Yes	Yes	No	No	-	Yes	Chl (0.947)	chlo: 13	Class I (chl/mit)	MASISNALSLKHGLSLWCPQSTPSVNRISQPCSISSTNFRRRSFSVSASSFANENREFVIVGGGNAAGYAARTFVEHGMADGKLCIVSKEAYAPYERPALTKGYLFPHDKKPARLPGFHTCVGSGGERQTPDWYKEKGIEMLHEDPVSDINIEKQTLKTSSGKLLKFGSLIIATGCTASRFPDKIGGNLSGVHYVRDVADANSLISSLEKAKKVVVVGGGYIGMEVAAAAVAWKVDTTIIFPEEHLMTRLFTPSLAQKYEQLYQDFGVKFVKGASISNLEAGSDGHVVGVKLANGSIIEADTVVVGIGAKPAVGPFESVGLNNTVGGIQVDGLFRTSIPGIFAIGDVAAFPLKIYDRTTRVEHVDHARRSAQHCVKSLLTAHTDTYDYLPYFYSRVFEY…
		Solanaceae	Solanum lycopersicum iTAG2.4 proteome	3	Solyc09g009390.2.1	SlyMDAR3	433	Yes	Yes	SKI	No	-	No			Class III (cyt/per)	MAEKSFKYVIVGGGVSAGYAAREFAKQGVKPGELAIISKEAVAPYERPALSKAYLFPEGAARLPGFHVCVGSGGERQLPEWYAEKGISLILSTEIVKADLASKTLVSAAGESFKYQTLVIATGSTVLKLSDFGVQGADSKNIFYLREIDDADQLVEALKAKKNGKAVVVGGGYIGLELSAVLRLNNIEVNMVYPEPWCMPRLFTEGIAAFYEGYYKNKGVNIIKGTVAVGFDTHPNGEVKEVKLKDGRVLEADIVVVGVGARPLTTLFKGQVEEEKGGIKTDAFFKTSVPDVYAVGDVATFPLKMYNEIRRVEHVDHSRKSAEQAVKAIFASEQGKSVDEYDYLPYFYSRAFDLSWQFYGDNVGETVLFGDADPNSATHKFGQYWIKDGKIVGAFLESG…
					Solyc02g086710.2.1	SlyMDAR1	481	Yes	Yes	No	452-474	Yes	No			Class II (per mem)	MGRAFVYVILGGGVAAGYAAHEFVKRGVSHGELCIISEEPVAPYERPALSKGYLLPEDPARLPAFHCCVGSNEERLTPKWYKENGIELVLGTRVKSADVRRKTLLTATGETITYKILIVATGARALKLEEFGVSGSDAESVCYLRDLADANRLVNVMQSSGGGNAVVIGGGYIGMECAASLVIGKINVTMVFPEAHCMARLFTPKIASFYEEFYRSKGVKFVKGTVLTSFDFDSNDKMTAVNLRDGTKLPADMVIVGIGIRPNTSLFEGQLTLEKGGIKVNGQMQSSNSSVYAVGDVATFPVKIFGETRRLEHVDSARKSARHAVAAIMEPEKTTEFDYLPFFYSRVFTLSWQFYGDSTGDVVHFGDFLGNSFGAYWVNKGHVVGSFLEGGTKEEYEAI…
					Solyc08g081530.2.1	SlyMDAR2	482	Yes	Yes	No	No	-	Yes	Chl (0.862)	chlo: 12, mito: 2	Class I (chl/mit)	MATTPNTMSIKQGLSLWCPQSAVLNRISRVSVPSRSFRRSFVAASSFDNENREYVVVGGGNAAGYAARTFVEHGQANGKLCIVTKEPYAPYERPALTKAYLFPLDKKPARLPGFHTCVGAGGERQTPDWYKEQGIEMLYEDPVTGIDIEKQTLTTNSGKLLKYGTLIIATGCTASRFPEKIGGNLPGVHYIRDVADADSLISSLGKAKKLVVVGGGYIGMEVAAAAVAWKLDTTIIFPEEHLLSRLFTPSLAQKYEQLYQDSGVKFVKGAKIKHLESGPDSRVTAVKLEDGSSIETDTVVIGIGAKPAVSPFDMVGLNNTVGGIEVDGQFRTNIPGIFAIGDVAAFPLKIYNRIARVEHVDHARKSAQHCIKSLLTAHTHTYDYLPYFYSRVFEYEGSS…
			Solanum tuberosum v4.03 proteome	3	PGSC0003DMT400007000	StuMDAR1	433	Yes	Yes	SKI	No	-	No	-	-	Class III (cyt/per)	MAEKSFKYVIVGGGVSAGYAAREFAKQGVNPGELAIISKEAVAPYERPALSKAYLFPEGAARLPGFHVCVGSGGERQLPEWYAEKGISLILSTEIVKADLASKTLVSAAGESFKYQTLVIATGSTVLKLSDFGVQGADSKNIFYLREIDDADQLVEALKAKKNGKAVIVGGGYIGLELSAVLRLNNIEVNMVYPEPWCMPRLFTEGIAAFYEGYYQNKGVNIIKGTVAVGFDTHPNGEVKEVKLKDGRVLEADIVVVGVGAKPLTTLFKGQVEEEKGGIKTDAFFKTSVPDVYAVGDVATFPLKMYNEIRRVEHVDHSRKSAEQAVKAIFASEQGKSVDEYDYLPYFYSRAFDLSWQFYGDNVGETVLFGDADPNSATHKFGQYWIKDGKIVGAFLESG…
					PGSC0003DMT400001279	StuMDAR2	481	Yes	Yes	No	452-474	Yes	No	-	-	Class II (per mem)	MGRAFVYVILGGGVAAGYAAHEFVKRGVSHGELCIISEEPVAPYERPALSKGYLLPEDPARLPAFHCCVGSNEERLTPKWYKENGIELVLGTRVKSADVRRKTLLTATGETITYKILIVATGARALKLEEFGVSGSDAESVCYLRDLADANRLVNVMQSSGGGNAVVIGGGYIGMECAASLVIGKINVTMVFPEAHCMARLFTAKIASFYEEFYRSKGVKFVKGTVLTSFDFDSNDKMTAVNLRDGTKLPADMVIVGIGIRPNTSLFEGQLTLEKGGIKVNGQMQSSNSSVYAVGDVATFPVKIFSETRRLEHVDSARKSARHAVAAIMEPEKTTEFDYLPFFYSRVFTLSWQFYGDSTGDVVHFGDFLGNSFGAYWVNKGHVVGSFLEGGTKEEYAAI…
					PGSC0003DMT400032099	StuMDAR3	488	Yes	Yes	No	No	-	Yes	Chl (0.761)	chlo: 9, mito: 5	Class I (chl/mit)	MATMPNTMSFKQGLSLWCPQSAALNRIPRVSVPSRSFRRSFVAAASFDNENREYVVVGGGNAAGYAARTFVEQGQANGKLCIVTKEPYAPYERPALTKAYLFPLDKKPARLPGFHTCVGAGGERQTPDWYKEQGIEMLYEDPVTGVDIEKQTLTTNSGKLLKYGTLIIATGCTASRFPEKIGGNLPGVHYIRDVADADSLISSLGKAKKLVVVGGGYIGMEVAAAAVAWKLDTTIIFPEEHLLSRLFTPSLAQKYEQLYQDNGVKFVKGAKIKHLESGPDGRVTAVKLEDGSSIETDTVVIGIGAKPAVSPFDMVGLNKTVGGIEVDGQFRTSIPGIFAIGDVAAFPLKIYNRIARVEHVDHARKSAQHCIKSLLTAHTHTYDYLPYFYSRVFEYEGSS…
		Crassulaceae	Kalanchoe fedtschenkoi v1.0 proteome	4	Kaladp0059s0169.1	KfeMDAR1	435	Yes	Yes	SKI	No	-	No	-	-	Class III (cyt/per)	MAAEKTFKYIILGGGVSAGYAAREFSKQGLEPGQLAIISKEAVAPYERPALSKAYLFPEGTARLPGFHTCVGSGGERLLPEWYKEKGIELILSTEVVKADLASKTLVSAAGETFKYTNLIIATGSTVIRLTDFKVQGADAKNIFYLREIDDADNLVAAIKAHPKGKAVVVGGGYIGLELSAALKINDLDVTMVYPEPWCMPRLFTAEIAAFYEGYYANKGIQIIKGTVAVGFDSDENGAVKNVKLKDGRVLDADIVIVGVGGRPLTTLFKGQVEEDKGGIKTDAFFKTSVPDVYAVGDVATFPMKIYNDIRRVEHVDHARKSAEHAVKAIKASEEGNTIEEYDYLPYFYSRSFDLSWQFYGDNVGDTVLFGDNNPSTPKAKFGTYWIKEGKIVGAFLES…
					Kaladp0059s0099.1	KfeMDAR2	437	Yes	Yes	SKI	No	-	No	-	-	Class III (cyt/per)	MAAENIFKYLILGGGVSAGYAAREFSKQGLKPGQLAIISKEAVAPYERPALSKAYLFPEAVGTARLPGFHTCVGSGGERLLPEWYKEKGIELILSTEVVKADLASKTLVSAAGDTFKYGNLIIATGSTVIRLTDFNVQGADAKNIFYLREIDDADSLVAAIKAHPKGKAVVVGGGYIGLELSAALRINELDVTMVYPEPWCMPRLFTAEIAAFYEGYYANKGVKIIKGTVAVGFDSDGSGAVKNVKLKDGRVLDADIVVVGVGGRPLTTLFKGQVEEEKGGIKTDAFFKTSVPEVYAVGDVSTFPMKIYNDVRRVEHVDHARKSAEHAVKAIKASEEGNTIEEYDYLPYFYSRSFDLSWQFYGDNVGDTVLFGDNNPSTPKAKFGTYWIKEGKIVGAFL…
					Kaladp0040s0406.1	KfeMDAR3	483	Yes	Yes	No	5-24, 454-476	Yes	No	-	-	Class II (per mem)	MGRAFVYVILGGGVAAGYAALEFVKRGISPGELCIISEEPVVPYERPALSKGFLLPEDPARLPSFHTCVGANQERLTPKWYKEHGIEMVLSTRVKSADVRRKTLLTSTGETISYRILIVATGARALRLEEFGVNGSDAPNVCYLRNLADATRLVEVMQSNTGGSAVVIGGGYIGMECAASLVINKINVTMVFPEAHCMARLFTPQISNYYEEFYKSKGVNFVKGTVLTSFEMDSTGKVVAVRLKDENVLSADMVVVGIGIRPNTSLFEGQLTIEKGGIKVNGRMQSSNSSVYAVGDVATFPVKLFGESRRLEHVDSARKAARHVVAAILEPDKTGDFDYLPFFYSRVFSCSWQFYGDNVGEVLHFGDYTSGNTFGAYWISKGRLVGSFLEGGTKEEYEA…
					Kaladp0075s0070.1	KfeMDAR4	507	Yes	Yes	No	481-500	Yes	Obscure	Other (0.726)	chlo: 9, plas: 2, nucl: 1, cyto: 1	Class II (per mem)	MNSRSEASPQSSEAETSAEMVREFEYVIIGGGVAAGYAALEFVKRGVTDGQLCIISDELVEPYERPALSKGVLCLEAPARLQSFQTCVASDEESLTPEWYKEHGIEMILGTHVDSVDVEQKMLLTNAGESISYRILLVATGAQALKLGEFRVREPDAENLCYLRNLADASKLVRVMQGCVGGEAVVIGGGYLAMECASSLVTNKIKVTMIFPEAHFMARLFTQKIASFYEGYYKARGVEIIRGTIISSFEIGSDSQKIVAVNLRDGRRMPASMVVVAIGIRPNTSLFEGQLTMEKGGIKVNGHMQSSNSSVYAVGDAAAFSVGPFGKVSRLEHADSARKSARHAVAAIMDPKNTGEFDYLPLFYSRAFKFAWRFYGHREGEAVHFGEFSLGSAFGAYWV…
		Vitaceae	Vitis vinifera Genoscope.12X proteome	3	GSVIVT01033815001	VviMDAR1	434	Yes	Yes	CKI	No	-	No	-	-	Class III (cyt/per)	MAEKHFKYVILGGGVSAGYAAREFAKQGVKPGELAIISKEAVAPYERPALSKAYLFPEGAARLPGFHVCVGSGGERLLPEWYKEKGIELILSTEIVKADLASKTLISAAGETFKYHILIIATGSTVIRLTDFRVEGADAKNILYLREINDADKLIDVIKAKKNGKAVIVGGGYIGLELSAVMKINNLDVCMVYPEPWCMPRLFTAGIAAFYEGYYANKGIKIIKGTVAVGFTSDANGEVKEVKLKDGRVLEADIVVVGVGGRPLTTLFKGQVEEEKGGIKTDEFFKTSVPDVYAVGDVATFPLKLYNEIRRVEHVDHARKSAEQAVKAIKASEEGKSVEEYDYLPYFYSRAFDLSWQFYGDNVGETVLFGDNNPASPKAKFGTYWIKDGKVVGAFLEGG…
					GSVIVT01032453001	VviMDAR2	478	Yes	Yes	No	450-472	Yes	No	-	-	Class II (per mem)	MGRAITYVILGGGVAAGYAALEFTKRGISHGELCIISEEPVVPYERPALSKGFLLPEAPSRLPSFHTCVGANEERLTPKWYKEHGIELVLGTRVKSADVRRKTLLTATGETISYKILIIATGARALQLEEFGVAGSDAENVCYLRDLADATRLVDVMKSCTGGNAVVIGGGYIGMECAASLVINKINVTMVFPEAHCMARLFTPKIASYYEDYYKSKGVKFIKGTALSSFDIDDSGKVTAVTLRDGNRLPADMVVVGIGIRPNTGLFEGQLTLEKGGIKVNGWMQSSNSSVYAVGDVAAFPVKLFGETRRLEHVDSARKSARHAVTAIMEPAKTSEFDYLPFFYSRVFTLSWQFYGDSVGEVVHYGDFSGSTFGAYWVSKGQLVGSFLEGGTKEEYEAI…
					GSVIVT01019412001	VviMDAR3	490	Yes	Yes	No	No	-	Yes	Chl (0.875)	mito: 7.5, chlo_mito: 7.5, chlo: 6.5	Class I (chl/mit)	MASISNSLPLKHGISLWCPQHASLNRTRLPSSFGSSASARRYGVVSCAFANENREFVIVGGGNAAGYAARTFVEHGMADGKLCIVSKEAFAPYERPALTKGYLFPLDKKPARLPGFHTCVGSGGERQTPDWYKEKGIEMLYEDPVTGIDIEKQTLMTNSGKLLKYGSLIIATGCTASRLPDKIGGNLPGVHYIRDVADADSLISSLEKARKVVIVGGGYIGMEVAAAAAGWKLDTTIIFPEDHLLQRLFTPTLARRYEEFYQENGVKFVKGASIKNIEAGSDGHVTAVKLENGSTIEADTIIIGIGAKPAVSPFERVGINTTVGGIQVDGQFRTSVPGIFAIGDVAAFPLKMYNRIARVEHVDHARRSAQHCINALLTAKTHLYDYLPYFYSRVFEYEG…
		Linaceae	Linum usitatissimum v1.0 proteome	4	Lus10035593	LsuMDAR1	431	Yes	Yes	No	No	-	No	-	-	Class III (cyt/per)	MAEKSFKYVILGGGVSAGYAARQFEKQGVNAGELAIISKEAVAPYERPALSKAYLFPTGTARLPGFHTCVGGGGDRLIPEWYTEKGIELILNTEIVKADLASKSLVSAAGDTFKYETLVIATGSTVLRLTDFGVEGADAKNIFYLREIDDADKLVEAIKAKPNGKAVIVGGGYIGLELSAALKINNLDVTMVYPEPWCMPRLFTAEIAAFYEGYYANKGIKIIKGTVAVGFTSDSNGEVKEVKLKDGTVLEGDIVVVGVGGRPLAALFKGQVEEEKGGIKTDGFFKTSVADVYAVGDVATFPMKIYNEIRRVEHVDHARKSAEQAVKAILSTEKVEEYDYLPYFYSRAFDLSWQFYGDNVGETVLFGNNDPASEKPKFGTYWVKDGKVVGAFLEGGSPD…
					Lus10022260	LsuMDAR2	483	Yes	Yes	No	454-476	Yes	No	-	-	Class II (per mem)	MGRAFVYVILGGGVAAGYAALEFTRKGVAPGELCIISEEPVAPYERPALSKGYLLPEAPSRLPSFHTCVGANEEKLSPKWYKEHGIELVLGTRVISADVRRKTLLTAAGETISFKILIIATGARALKLEEFGVTASDAQNVCYLRDIADANRLVDVVGSRAGGNAVVIGGGYIGMECAASLVINKMNVAMVFPEAHCMARLFSPKIAGYYEEYYESKGVQFVKGTVLSSFDFGADGQVTAVNLRDGTQLPADMVVVGIGIRPNTSLFEGQLTLEKGGIKTNARMQTSNSSVYAVGDVATFPVKLFGETRRLEHVDCARKSARHAVAAIMEPQKTEDFDYLPFFYSRVFAFSWQFYGDNAGEVVHFGDFSGNRIGGYWVSKGHLVGSFLEGGTKEEYEAI…
					Lus10013079	LsuMDAR3	536	Yes	Yes	No	507-529	Yes	No	-	-	Class II (per mem)	MGRAFVYVILGGGVAAGYAALEFTRKGVAPGELCIISEEPVAPYERPALSKGYLLPEAPSRLPSFHTCVGANEEKLSPKWYKEHGIELVLGTRVISADMRRKTLLTATGETISFKILIIATGARVLKLISTGLKLTDRSKLTFIHIGGWVKDQSARNSTSQDIFISMNETLVNNMALKLEEFGVTASDAQNVCYLRDIADANRLVDVVGSRAGENAVVIGGGYIGMECAASLVINKMNVAMVFPEAHCMARLFSPKIAGYYEEYYESKGVQFVKGTVLSSFDFGADGQVTAVNLRDGTQLPADMVVVGIGIRPNTSLFEGQLTLEKGGIKTNARMQTSNSSVYAVGDVATFPVKLFGETRRLEHVDCARKSARHAVSAIMEPQKTDDFDYLPFFYSRVF…
					Lus10028763	LsuMDAR4	510	Yes	Yes	No	No	-	Yes	Chl (0.857)	chlo: 9, cyto: 3, mito: 2	Class I (chl/mit)	MASISSTLSLKHGLSLWPSDSAAPLSRKSTALKIGFRSFRRSFVVASSTFSNENREFVIVGGGNAAGYAARTFVEHGMADGKLCIVTKEPHAPYERPALTKAYLFPLDKKPARLPGFHTCVGSGGERQTPDWYKEKGIEMIYQDPVTSVDVEKQTLTTNSGKLLKYGALIVATGCTASRFPEKIGGNLPGVHYIRDVADADSLISSLEKAKKVVIVGGGYIGMEVAAAAVGWKLDTTIVFPEDHLLQRLFTPLAQRYEQFYQENGVKFMKGASIKNLEAGYDGRVAAVMLEDGSTLEADVVVIGIGGKPAVSAFENVGLNSTVGGLEVDGLFRTKTPGIFAIGDVAAFPLKIYNRTARVEHVDHARRSAQHCVKSLLTAHTNTYDYLPYFYSRVFEFEG…
					Lus10008633	LsuMDAR-like	396										MAEKSFKYVILGGGVSARTVSFHFIDVPTHTIACVLSSSELRILMMQGYAARQFEKQGVNAGELAIISKEAKRDVGHLMEICSLVPMVAGIELIPDFGVEGADAKNIFYLREIDDADKLVEAIKAKPNGKAVIVGGGYIGLELSAALKINNLDVTMVYPEPWCMPRLFTAEIAAFYEGYYANKGIKIIKGTVAVGFTSDSNGEVKEVKLKDGTVLEGDIVVVGVGGRPLTALFKGQVEEEKGGIKTDGFFKTSVADVYAVGDVATFPMKIYNEIRRVEHVDHARKSAEQAVKAILSTEKVEEYDYLPYFYSRAFDLSWQFYGDNVGETVLFGNNDPASEKPKFGTYWVKDGKVVGAFLEGGSPDENKAIAKVARMQPVVDNIGLLVQEGLGFASFY
		Euphorbiaceae	Manihot esculenta v6.1 proteome	3	Manes.08G023200.1	MesMDAR1	434	Yes	Yes	No	No	-	No	-	-	Class III (cyt/per)	MAEKSFKYVIVGGGVAAGYAAREFGNQGVKSGELAIISKEAVAPYERPALSKAYLFPEGTARLPGFHVCVGSGGERLAPEWYKEKGIELILSTEIVKADLATKTLTSAAGETFKYQILIIATGSTVIRLTDFGVQGADSKNIFYLREIDDADKLVEVIKAKKDGKAVIVGGGYIGLELSAALRINNIDVTMVYPEPWCMPRLFTAELAAFYEGYYANKGINIIKGTVAAGFTADSNGEVKEVKLKDGRVLEADIVVVGVGGRPLTALYKGQVEEEKGGIKTDAFFRTSVPDVYAVGDVATFPLKLYNELRRVEHVDHARKSAEQAVKAIKSSEEGKTIDEYDYLPYFYSRAFELSWQFYGDNVGESVFFGDSDPKAPKPKFGSYWIKDGKVVGAFLEGG…
					Manes.15G149700.1	MesMDAR2	478	Yes	Yes	No	449-471	Yes	No	-	-	Class II (per mem)	MGRAFVYVILGGGVSAGYAALEFTRRGVSRGELCIISEEPVPPYERPALSKGCLLPETPARLPSFHTCVGANEERLTPKWYKEHGIELVLGTRVKSADVKRKTLLTAAGETISYKILIIATGAQALKLEEFGVSGSNAENVCYLRDLADAERLVNVMQSCAGGNAVVIGGGYIGMECAASLVINKINVTMVFPEAHCMARLFTPKIASYYEDYYKSKGVKFIKGTVLSSFDMDSNGKVTAVNLRDGSRLPANMVVVGIGIRPNTSLFEGQLTLEKGGIKVNGRMQTSNSSVYAVGDVAAFPVKLFGETRRLEHVDSARKSARHAVSAIMEPKKTDDFDYLPFFYSRVFALSWQFYGDAAGEAVHFGDYSGSTIGAYWISKGHLVGSFLEGGSKEDYEAI…
					Manes.01G057400.1	MesMDAR3	497	Yes	Yes	No	No	-	Yes	Chl (0.702)	chlo: 11, mito: 3	Class I (chl/mit)	MSAVWKLMATISNSLSLKHGLSLCSPYSSSLNRSFHTPTVGYRTVYRNYVVASSAFSNENREYVIVGGGNAAGYAARTFVEHGMADGRLCIVTKEPHAPYERPALTKGYLFPLDKKPARLPGFHTCVGSGGERQTPDWYKEKGIEMLYEDPVTSVDIEKQTLATNSGRVLKYGTLIIATGCTASRFPEKIGGNLPGVHYIRDVADADALISSLEKARKVVVVGGGYIGMEVAAAAVGWKLDTTIIFPEKHLLQRLFTPSLAYRYEELYKENGVKFLKGTSIKNLEAGSDGRVASVKLEDGSIIEADTVIIGIGAKPAVGPFEKVGLNLNATVGGIQVDGLFRTNIPGIFAIGDVAAFPLKMYNRTARVEHVDHARRSAQHCVKALLTAQTTVYDYLPYF…
					Manes.09G058800.1	MesMDAR-like	377										AGTARLPGFHVCVGSGGERLAPEWYKEKGIELILSTEIVEADLATKTLTSAAGEAFKYQILIIATGSTVVKLSDFGVQGADAKNIFYLREIDDADKLVEGIKAKKNGKAVVVGGGYIGLELSAALRINNIDVSMVYPEPWCMPRLFTADIAAFYEGYYANKGVKIIKGTFAVGFNADSNGEVKEVKLKDGRVLEADIVVVGVGAIPLTTLFKGQVAEDKGGIKTDAFFRTSVPDVYAVGDVATFPLKLYNELRRVEHVDHARKSAEQAVKAIKSSEEGETIDEYDYLPYFYSRAFDLSWQFYGDNVGDTVLFRDSDQKSPKPKFGSYWIKDGKVVGAFLEGGSPDENKAIAKVARVQPSVQNLDLLTKEGLSFACKI
		Salicaceae	Populus trichocarpa v3.0 proteome	3	Potri.006G114800.2	PtrMDAR1	434	Yes	Yes	CKI	No	-	No	-	-	Class III (cyt/per)	MAEKSFKYVIIGGGVSAGYAAREFCKQGVKPGELAIISKEAVAPYERPALSKAYLFPEGTARLPGFHVCVGSGGERLLPEWYKEKGIELILSTEIVKADLAAKTLVSAAGEIFKYHILIIATGSTVIKLTDFGVQGADAKNILYLREIDDADKLVEAIKGKKNGKAVIVGGGYIGLELSAALRINNIDVTMVYPEPWCMPRLFTAGIAAFYEGYYANKGVKIVKGTVAVGFNADSNGEVKEVKLKDGRVLEADIVVVGVGGRPLTTLFKGQVEEEKGGIKTDAFFKTSISDVYAVGDVATFPLKLYNDIRRVEHVDHARKSAEQAVKAIKSNEEGKTIDVYDYLPFFYSRSFDLSWQFYGDNVGDAVLFGDNDPASPKPKFGSYWIKDGKVVGVFLEGG…
					Potri.001G346200.1	PtrMDAR2	478	Yes	Yes	No	449-471	Yes	No	-	-	Class II (per mem)	MGRAFVYVILGGGVAAGYAALEFTKKGVSPGELCIISEETVPPYERPALSKGYLLPEAPARLPSFHTCVGANEERLTPKWYKEHGIELILGTRVKSVDVRRKTLLTAVGETISYKILIIATGARALKLEEFGVSGSDAENVCYLRDLADANRVVDVMQSCASGNAVVIGGGYIGMECAASLVTNRINVTMVFPEVHCMARLFTPKIASYYEGYYNSKGVRFVKGTVLSSFEIDPIGKVTAVNLRDGSQLPADMVVVGIGIRPNTSLFEGQLTLEKGGIKVNGRMQTSNTSVYAVGDVAAFPVKLFGETRRLEHVDSARKTAKHAVAAIMEPEKTDEFDYLPFFYSRFFTFSWQFYGDNAGEVVHFGDYSGNTIGAYWISKGHLVGSFLEGGTKEEYEAL…
					Potri.001G099600.1	PtrMDAR3	505	Yes	Yes	No	No	-	Yes	Chl (0.912)	chlo: 12, mito: 2	Class I (chl/mit)	MSQVRRLIMASGSSISSNPMSFKHGLSLWCPQSSPLHRTLQSSPSSSIGFKTFFRNHVVAASSSSFANENREYVIVGGGNAAGYAARSFVEHGMADGKLCIVTREAYAPYERPALTKAYLFPLDKKPARLPGFHTCVGSGGERQTPDWYKEKGIEMLYEDPVTGIDIEKQTATTISGKLLKYGTLIVATGCSASRFPEKIGGNLPGVHYIRDVADADSLISSLEKAHKLVIVGGGYIGMEVAAAAVAWKLDTTIIFPENHLMQRLFTPSLAQKYEELYQENGVKFIKGASIKNLEASSDGHVAAIKLENGSTIEADMVIIGIGAKPAVGPFERLGLNNSVGGIQVDGQFRTGIPGIFAIGDVAAFPLKMYNRMARVEHVDHARRSAQHCVKSLLTAHTS…
			Salix purpurea v1.0 proteome	3	SapurV1A.0208s0150.1	SpuMDAR1	434	Yes	Yes	CKI	No	-	No	-	-	Class III (cyt/per)	MAEKSFKYVIIGGGVSAGYAAREFIKQGVKPGELAIISKEAVAPYERPALSKAYLFPEGTARLPGFHVCVGSGGERLLPEWYKEKGIELILSTEIVKADLAAKTLVSAAGEIFKYHILIIATGSAVIRLTDFGVQGADAKNIFYLREIDDADKLVQVIKEKKNGKVVIVGGGYIGLELSAALRINNLDVTMVYPEPWCMPRLFTAGIAAFYEGYYANKGVKIIKGTVAVGFNADSNGEVKEVKLKDGRVLEADIVVVGVGGRPLVTLFKGQVEEEKGGIKTDAFFKTSVSDVYAVGDVATFPMKLYNDIRRVEHVDHARKSAEQAVKAIKSNEEGKTIDVYDYLPFFYSRSFDLSWQFYGDNVGDAVLFGDNDPASPNPKFGSYWIKDGKVVGAFLEGG…
					SapurV1A.1328s0030.1	SpuMDAR2	479	Yes	Yes	No	450-472	Yes	No	-	-	Class II (per mem)	MGRAFVYVILGGGVAAGYAALEFTKKGVSPGELCIISEETVPPYERPALSKGYILPEAPARLPSFHTCVGANEEKLTPKWYKEHGIELILGTRVKSVDVRRKTLLTAVGETISYKILIIATGARALKLEEFGVSGSDAENVCYLRDLDDANRVVDVMQSCASGNAVVIGGGYIGMECAASLVTNRINVTMVFPEVHCMARLFTPKIASYYEGYYSSKGVQFVKGTVLTSFEIDPIGKITAVNLRDGSQLPADMVVVGIGIRPNTSLFEGQLTLEKGGIKVNGQMQTSNTSVYAVGDVAAFPVKLFGETRRLEHVDSARKTAKHAVSAIMEPEKTDEFDYLPFFYSRFFTFSWQFYGDNAGEVVHFGDYSGKTIGAYWISKGHLVGSFLEGGTKEEYEAL…
					SapurV1A.0098s0340.1	SpuMDAR3	506	Yes	Yes	No	No	-	Yes	Chl (0.874)	chlo: 12, mito: 1	Class I (chl/mit)	MSQVRRLIMAVSSTISSNPMSFKHGLSLWCPQSSPSLHRTLQSSSSSIGFKTFLRNHVVAASTSSSFANENREYVIVGGGNAAGYAARSFVEHGMADGRLCIVTKEAYAPYERPALTKGYLFPLDKKPARLPGFHTCVGSGGERQTPDWYKEKGIEMLYEDPVTGIDIEKQTATTISGKLLKYGTLIVATGCTATRFPEKIGGNLPGVHYIRDVADADSLISSLEKAHKLVVVGGGYIGMEVAAAAVGWKLDTTIIFPENHLLQRLFTPSLAQKYEEFYQENGVKFIKGASIKNLEASSDGRVASIKLENGSTIEADTVIIGIGAKPAVSPFERLGLNNSVGGIQVDGQFRTGIPGIFAIGDVAAFPLKMYNRMARVEHVDHARRSAQHCVKSLLTAHT…
		Rutaceae	Citrus sinensis v1.1 proteome	3	orange1.1g012545m	CsiMDAR1	461	Yes	Yes	SKI	No	-	No	-	-	Class III (cyt/per)	MAEKSFKYVILGGGVSAGYAAREFAKQGVKPGELAIISKEAVAPYERPALSKAYLFPEGTARLPGFHVCVGSGGERLLPEWYKEKGIELILSTEIVRADIASKTLLSATGLIFKYQILVIATGSTVSITSLTSIRSKHCLCCFFLRTLPLFQVLRLTDFGVEGADAKNIFYLREIDDADKLVEAIKAKKNGKAVVVGGGYIGLELSAALKINNIDVSMVYPEPWCMPRLFTADIAAFYEGYYANKGIKIIKGTVAVGFTTNADGEVKEVKLKDGRTLEADIVVVGVGGRPLISLFKGQVAENKGGIETDDFFKTSADDVYAVGDVATFPMKLYREMRRVEHVDHARKSAEQAVKTIMATEGGKTVTGYDYLPYFYSRAFDLSWQFYGDNVGDTVLFGDN…
					orange1.1g011700m	CsiMDAR2	479	Yes	Yes	No	450-472	Yes	No	-	-	Class II (per mem)	MGRAFVYVIVGGGVAAGYAALEFTKRGVPPGELCIISEEPVAPYERPALSKGYLLPEAPARLPSFHTCVGANEERLTPKWYNEHGIELVLGTRVKSADVRRKTLVTATGETISYKILIIATGARALKLEEFGLSGSDAENVCYLRDLADANRLVNVMKSCSGGNAVVIGGGYIGMECAASLVINKINVTMVFPEAHCMARLFTPKIASYYEEYYKSKGVKFVKGTVLSSFDVDSNGKVVAVNLRDGNRLPTDMVVVGIGIRPNTSLFEGQLTLEKGGIKVTGRLQSSNSSVYAVGDVAAFPLKLLGETRRLEHVDSARKSAKHAVAAIMEPDKTDKFDYLPFFYSRVFTLSWQFYGDNVGEVVHYGNFSGTTFGAYWVNKGRLVGSFLEGGTKEEYEAI…
					orange1.1g010917m	CsiMDAR3	497	Yes	Yes	No	No	-	Yes	Chl (0.517)	mito: 9, chlo: 5	Class I (chl/mit)	MSTARKLKVMASVSNSLSFKHGLSLWCPQSPSLHRIRHSSAKNFQRRGFVVAYSSFANENREFVIVGGGNAAGYAARTFVEHGMADGRLCIVSKEAYAPYERPALTKGYLFPLDKKPARLPGFHTCVGSGGERQTPEWYKEKGIEMIYQDPVTSIDIEKQTLITNSGKLLKYGSLIVATGCTASRFPEKIGGYLPGVHYIRDVADADALISSLEKAKKVVVVGGGYIGMEVAAAAVGWKLDTTIIFPENHLLQRLFTPSLAQRYEQLYQQNGVKFVKGASIKNLEAGSDGRVAAVKLEDGSTIDADTIVIGIGAKPTVSPFERVGLNSSVGGIQVDGQFRTRMPGIFAIGDVAAFPLKMYDRTARVEHVDHARQSAQHCIKALLSAQTHTYDYLPYFYS…
			Citrus clementina v1.0 proteome	3	Ciclev10011764m	CclMDAR1	434	Yes	Yes	SKI	No	-	No	-	-	Class III (cyt/per)	MAEKSFKYVILGGGVSAGYAAREFAKQGVKPGELAIISKEAVAPYERPALSKAYLFPEGTARLPGFHVCVGSGGERLLPEWYKEKGIELILSTEIVRADIASKTLLSATGLIFKYQILVIATGSTVLRLTDFGVEGADAKNIFYLREIDDADKLVEAIKAKKNGKAVVVGGGYIGLELSAALKINNIDVSMVYPEPWCMPRLFTADIAAFYEGYYANKGIKIIKGTVAVGFTTNADGEVKEVKLKDGRTLEADIVVVGVGGRPLISLFKGQVAENKGGIETDDFFKTSADDVYAVGDVATFPMKLYREMRRVEHVDHARKSAEQAVKTIMATEGGKTVTGYDYLPYFYSRAFDLSWQFYGDNVGDTVLFGDNDLASATHKFGTYWIKDGKVVGVFLESG…
					Ciclev10015090m	CclMDAR2	479	Yes	Yes	No	450-472	Yes	No	-	-	Class II (per mem)	MGRAFVYVIVGGGVAAGYAALEFTKRGVPPGELCIISEEPVAPYERPALSKGYLLPEAPARLPSFHTCVGANEERLTPKWYNEHGIELVLGTRVKSADVRRKTLVTATGETISYKILIIATGARALKLEEFGLSGSDAENVCYLRDLADANRLVNVMKSCSGGNAVVIGGGYIGMECAASLVINKINVTMVFPEAHCMARLFTPKIASYYEEYYKSKGVKFVKGTVLSSFDVDSNGKVVAVNLRDGNRLPTDMVVVGIGIRPNTSLFEGQLTLEKGGIKVNGRLQSSNSSVYAVGDVATFPLKLLGETRRLEHVDSARKSAKHAVAAIMEPDKTDKFDYLPFFYSRVFTLSWQFYGDNVGEVVHYGNFSGATFGAYWVNKGQLVGSFLEGGTKEEYEAI…
					Ciclev10019842m	CclMDAR3	497	Yes	Yes	No	No	-	Yes	Chl (0.563)	mito: 9, chlo: 5	Class I (chl/mit)	MSTARKLKVMASVSNSLSFKHGLSLWCPQSPSLHRIRHSSARNFQRRGFVVAYSSFANENREFVIVGGGNAAGYAARTFVEHGMADGRLCIVSKEAYAPYERPALTKGYLFPLDKKPARLPGFHTCVGSGGERQTPEWYKEKGIEMIYQDPVTSIDIEKQTLTTNSGKLLKYGSLIVATGCTASRFPDKIGGNLPGVHYIRDVADADALISSLEKAKKVVVVGGGYIGMEVAAAAVGWKLDTTIIFPENHLLQRLFTPSLAQRYEQLYQQNGVKFVKGASIKNLEAGSDGRVAAVKLEDGSTIDADTIVIGIGAKPTVSPFERVGLNSSVGGIQVDGQFRTRMPGIFAIGDVAAFPLKMYDRIARVEHVDHARRSAQHCVKALLSAQTHTYDYLPYFYS…
		Caricaceae	Carica papaya ASGPB v0.4 proteome	3	evm.model.supercontig_5.56	CpaMDAR1	434	Yes	Yes	CKI	No	-	No	-	-	Class III (cyt/per)	MAEKSFKYVIVGGGVAAGYAAREFAKQGVQPGELAIISKEAVAPYERPALSKGYLFPEGAARLPGFHVCVGSGGERLLPEWYSEKGIQLILGTEIVKADLVAKTLVSAAGEVFKYQVLLIATGSTVIKLSDFGVQGADAKNIFYLREIDDADKLVEVIKAKKNGKAVVVGGGYIGLELSAALKINNLDVSMVYPEPWCMPRLFTAGIAAFYEGYYANKGIKIIKGTVAVGFTTDSNGEVKEVKLKDGRTLEADIVIVGVGGRPLISLFKGQVEEEKGGIKTDAFFKSSLPDVYAIGDVATFPMKLYKDMRRVEHVDHARKSAEQAVKAIKAAQAGKSIEEYDYLPYFYSRSFDLSWQFYGDNVGETVLFGNNDPTSANPKFGTYWIKDGKVLGAFLEGG…
					evm.model.supercontig_186.12	CpaMDAR2	478	Yes	Yes	No	449-471	Yes	No	-	-	Class II (per mem)	MGRAFVYVILGGGVAAGYAALEFTKRGVSPGELCIISEEPVAPYERPALSKGFLLPEAPARLPSFHTCVGANEEKLTPKWYKEHGIELVLGTRVMSADVRRKTLLTATGETISYKILIIATGARALKLEEFGVGSQDAENVCYLRDLADANRLVNVMQSCTGENAVVIGGGYIGMECAASLVINKINVTMVFPEAHCMARLFTPKIASYYEEYYKSKGVKFIKGTVLSSFDFDSKGKVTAVNLRDGSKLPADIVVVGIGIRPNTSLFEGQLTIEKGGIKVNGRLQASNSFVYAVGDVASFPVKLFGETRRLEHVDSARKSAKLAVAAIMEQEKTGEFDYLPFFYSRVFTLSWQFYGEPVGEVVHFGDYSGNMFGAYWVNKGHLVGSFLEGGTKEEYDAI…
					evm.model.supercontig_2231.1	CpaMDAR3	443	Yes	Yes	No	No	-	Yes	Chl (0.799)	chlo: 11, mito: 3	Class I (chl/mit)	MASIPNPVSLKYGLSLWCPHSQSLSRTIYSPSIGSRNFRRGLVVASSGFANENREFVIVGGGNAAGYAARTFVEHGMADGRLCIVSKEAHAPYERPALTKGYLFPLDKKPARLPGFHTCVGSGGERQTTEWYKEKGIEMLYEDPVTSIDIEKQTLTTNSGKLLKYGSLIIATGCTASRFPEKIGGNLPGVHYIRDVADADSLISSLEKAQKVVVVGGGYIGMEGVSIKNLEAGSDGRIAAVRLEDGTTLEADTVIIGIGAKPAVSPFERVGLNNTVGGIQVDGLFRTSVPGIFAIGDVAAFPLKMYDRIVRVEHVDHARRSAQHCVKALLSAHTHTYDYLPYFYSRVFEYEGSRRKIWWQFFGDNVGETTEVGNFNPKIATFWIDSGKLKGVLVESGSP…
		Malvaceae	Gossypium raimondii v2.1 proteome	6	Gorai.006G156800.1	GraMDAR1	434	Yes	Yes	CKI	No	-	No	-	-	Class III (cyt/per)	MAEKSFKYVILGGGVAAGYAAREFAKQGVQPGELAIISKEAVAPYERPALSKAYLFPEGAARLPGFHVCVGSGGERLLPEWYKEKGIELILSTEIVKADLPANTLVSAAGETFKYQILIIATGSTVIKLTDFGVQGADAKNIFYLREIDDADKLVESIKAKKNGKAVIVGGGYIGLELGAALKINNLDVSMVYPEPWCMPRLFTSGIAAFYEGYYANKGIKIIKGTVAVGFTSDSNGEVKEVQLKDGRVLEADIVVVGVGGRPLTALFKGQVEEETGGIKTDAFFKTSVPTVYAVGDVATFPLKLYNELRRVEHVDHARKSAEQAVKAIKGLEKGQSVDEYDYLPYFYSRSFDLAWQFYGDNVGDTVLFGDNNPQSPKPKFGSYWIKDGKVVGAFLEGG…
					Gorai.002G241300.1	GraMDAR2	434	Yes	Yes	CKI	No	-	No	-	-	Class III (cyt/per)	MAEKSFKYVILGGGVAAGYAAREFAKQGVQPGELAIISKEAVAPYERPALSKAYLFPEGAARLPGFHVCVGSGGERLLPEWYKEKGIQLILSTEIVKADLPAKTVVSAAGETFKYQILIIATGSTVIRLTDFGVEGADAKNIFYLREIDDADKLLEAIKAKKNGKAVIVGGGYIGLELAAVMKINNFDVTMVYPEPWCMPRLFTPDIAAFYEEYYANKGVKIIKGTVAVGFTSDSNGEVKEVKLKDGRALEADIVVVGVGGRPLTTLFKGQVEEEKGGIKTDAFFKTSVPNVYAVGDLATFPLKLYNELRRVEHVDHARKSAEQAVKAIKAGEEGKSVDEYDYLPYFYSRSFDLSWQFYGDNVGDTVLFGDSNPKSQKAKFGSYWIKDGKVVGAFLEGG…
					Gorai.013G166500.1	GraMDAR3	729	Yes	Yes	SKF	No	-	Yes (very long)	Other (0.592)	cyto: 6, pero: 3, plas: 2, chlo: 1, nucl: 1	Class III (cyt/per)	MGIWDLISWSTDSVRGLWQSSCGHGSTVITKGKEVSVDALQKVNHHGSAAISKGKEMSCTALEKMNHHLSDPETRSKISRVATDIAKNATVEGLKTIPGAYPTYKNCIKVISDDDQKFKSENKSKKQEEALKALQATVSKLEKEVDVLREQAARQAVKTKPRNTVFTRYLPMASSFNFVIGSAKFIFAPIERCLNCKRNFDENMKVLQKLLKELNTVKEVIELRLSAEIHGGTMQTEEVKNWLDDVQRIKTEIEIIERKAKEKKFLSRVFLGKMVEEKVVELKAFLRKGKAFLGMVKSFKYIIVGGGVAAGYAAREFDRQGLKPGQLAIISKEAVAPYERPTLSKGYLNPNPKAAARLPEFHVCVGSGGDRLLPDWYKEKGIQLILGTEIVKVNLALKT…
					Gorai.011G095600.1	GraMDAR4	480	Yes	Yes	No	452-474	Yes	No	-	-	Class II (per mem)	MGRAFVYVILGGGVAAGYAALEFTRKGVSPGELCIISEEPVAPYERPALSKGFLLPESPARLPSFHTCVGANEERLTPKWYKEHGIELVLGTRVKSVDVRRKKLLTATGETISYKILLIATGARALKLEEFGVDGSEAENVCYLRDLADANGLVNVMQSCSSGNAVVIGGGYIGMECAASLAINKINVTLVFPEVHCMARLFTPKIANYYEEYYQAKGVKFVKGTVLTSFEFDSSGKVMAVNLRDGSQLPADLVVVGIGIRPNTSLFEGQLTLEKGGIKVNGKMQTSNDSVYAVGDVAAFPVKLFGETRRLEHVDSARKSAKHAVAAIMEPKKSGEFDYLPFFYSRVFGLSWQFYGDNVGEAVHFGDYLSGTFGAYWISKGHLVGSFLEGGTKEEYEAI…
					Gorai.006G030700.1	GraMDAR5	479	Yes	Yes	No	450-472	Yes	No	-	-	Class II (per mem)	MERGFAYVIVGGGVAAGYAALEFTKRGVSHAQLCIISEEPVAPYERPTLSKKVLHPESPARLPSFHTCVGANEELLTSTWYEEHGIELVLGTRVESVDVGQKTLLTASGETIRYETLIIATGAKALKLEEFGVKGSEAENVCYLRDLADADRLVNVMQSCTGGNAVVIGGGYIAMECAASLVTNKINVTMVFPEAHCMPRLFTPKIARYYEDYYQSKGVKFIRGTILSSFEFDSNGKVTAVNLRDGSQIPVDMVVVGIGIRPNTSLFEGQLTMEKGGIKVNGKLQTSNDSVYAVGDVAVFPVDLCGRIRRLEHVDSARKTAKHVAAVIMEPDKTGKFEYLPLFYSKAFSFSWRFYGDNAGEVVHFGDYLGTKFGAYWINNGHLVGSFLEGGTEDEFEAI…
					Gorai.008G250000.1	GraMDAR6	493	Yes	Yes	No	No	-	Yes	Chl (0.635)	chlo: 11, mito: 3	Class I (chl/mit)	MYPARKAMASLSNSLQLKHGLTSWCPGSSSLTRRLPSSSIRFRSFVVAASSFSNDNREFVIVGGGNAAGYAARTFVEHGMADGKLCIVSKEAYAPYERPALTKGYLFPLDKKPARLPGFHTCVGSGGERQTPEWYKEKGIEMIYEDPVTAIDTEKQTLTTNSGKLLKYGSLIIATGCTASRFPDKIGGNLPGVHYIRDVADANSLISSLEKAQKVVIVGGGYIGMEVAAAAVAWKLDTSIIFPENQLLQRLFTPSLAQRYEELYKEYGVKFLKGASIKNLEAGPDGRVAAVKLGDGSTVEADMVVIGIGAKPAVSPFEVVGLNNTVGGIQVDGLFRTSVPGIFAVGDVAAFPLKMYDRVARVEHVDHARRSAQHCVKSLLSAQTHTYDYLPYFYSRVFE…
			Theobroma cacao v1.1 proteome	4	Thecc1EG022506t1	TcaMDAR1	434	Yes	Yes	CKI	No	-	No	-	-	Class III (cyt/per)	MAEKCFKYVILGGGVAAGYAAREFAKQGVQPGELAIISKEAVAPYERPALSKGYLFPEGAARLPGFHVCVGSGGERLLPEWYKEKGIELILSTEIVKADLPANTLVSAAGETFKYQILIIATGSTVIRLTDFGVQGADAKNIFYLREIDDADELIEAIKAKKNGKAVIVGGGYIGLELGAAMKINNFDVNMVYPEPWCMPRLFTSGIAAFYEGYYANKGIKIIKGTVAVGFTSDSNGEVKEVKLKDGRVLEADIVVVGVGGRPLTTLFKGQVEEEKGGIKTDACFKTSVPNVYAVGDVATFPMKLYNDMRRVEHVDHARKSAEQAVKAIKASEEGKSVDEYDYLPFFYSRSFDLAWQFYGDNVGDTVLFGDNDPQSPKAKFGSYWIKEGKVIGAFLEGG…
					Thecc1EG031321t1	TcaMDAR2	570	Yes	Yes	SKI	10-32, 135-157	No	Yes (long)	SP (0.853)	extr: 6, E.R.: 3, pero: 3, cyto: 1	Class III (cyt/per)	MQNHGAFQVFFSYSPMALFYPVFGSLKIIFGPFEQCLNCKKNFEKNMKMMKRLSEELDSLKEDIELRISAECHAGTMQTEEVKNWLEDVQRIKSETEVIEQKAGDKKFLSGAFLGKKVEVKVVELKAFLKKGKTFLGLVKYFRYIIIGGGVAAGYAAREFDRQGLKPGELAIISKEAVAPYERPALSKGYLNPKGAARLPEFHVCVGSGGERLLPGWYKEKGIQLFLSTEIVKVNLGSRTLISAAGETFKYQTLIIATGSTVIRLTDFKIEGADAKNIFYLRELEDADELAESMKAKKNGKAVIVGGGYIGLEVGAAMRINNFDVSMIYPEPWCMPRLFTPAIAAFYESYYANKGIKIIKGTVAVGFNANPNGEVTGVKLNNGRVLEADIVVVGVGARS…
					Thecc1EG016900t1	TcaMDAR3	478	Yes	Yes	No	449-471	Yes	No	-	-	Class II (per mem)	MGRAFVYVILGGGVAAGYAALEFTKRGVSHGELCIISEEPVAPYERPALSKGFLLPESPARLPSFHTCVGANEERLNPKWYKEHGIELVLGTRVKSADVRRKTLLTATGETISYKILIIATGARALKLEEFGVSGSEAENVCYLRDLADANSLVKVMQSCAGGNAVVIGGGYIGMECTASLVINKINVTMVFPEAHCMARLFTPKIASYYEDYYQSKGVKFIKGTVLSSFEFDSSGKVTAVNLRDGSRLPADMVLVGIGIRPNTSLFEGQLTLEKGGIKVNGKLQTSNNSVYAVGDVAAFPVKLFGETRRLEHVDSARKSAKHAVAAILEPEKTGEFDYLPFFYSRVFAFSWQSFGDNAGEVVHFGDSSGSTFGAYWISKGHLVGSFLEGGTKEEYEAI…
					Thecc1EG016334t2	TcaMDAR4	498	Yes	Yes	No	No	-	Yes	Mit (0.710)	chlo: 12, mito: 2	Class I (chl/mit)	MFPVRKAMAGLSNSLQLKHGLALWCPRSSPLTRPYPSSSIRFNGFHRNFVVASSSSFSNDNREFVIVGGGNAAGYAARTFVEHGMADGRLCIVSKEAYAPYERPALTKGYLFPLDKKPARLPGFHTCVGSGGERQTPEWYKEKGIEMIYEDPVTTINIEKQTLTTNSGKLLKYGSLIIATGCTASRFPEKIGGNLPGVHYIRDIADADSLISSLEKAKKVVVVGGGYIGMEVAAAAVGWKLDTTIIFPENHLLQRLFTPSLAQRYEELYKENGVKFLKGASIKNLEAGSNGQVAAVKLGDGSTIEADTIIIGIGAKPAVSSFEMVGLNTTVGGIQVDGLFRTSIPGIFAVGDVAAFPLKMYDRMARVEHVDHARRSAQHCVKALLSAQTHTYDYLPYFY…
		Brassicaceae	Arabidopsis halleri v1.1 proteome	4	Araha.14813s0013.1	AhaMDAR1	421	Yes	Yes	No	No	-	No	-	-	Class III (cyt/per)	MAEEKSFKYVIVGGGVSAGYAAREFFKQGVKPGELAIISREQVPPYERPALSKGYIHLENKATLPNFYVAAGSGGERQFPQWYKEKGIELILGTEIVKADLAAKTLVSGTGQVFKYQTLLAATGSSVIRLSDFGVPGADAKNIFYLRELEDADYLAYAMETKEKGKAVVVGGGYIGLELSAALKANNLEVTMVYPEPWCMPRLFTAGIASFYEGYYANKGINIVKGTVASGFSTNSNGEVTEVKLKDGRTLEADIVIVGVGGRPIISLFKGQVEEEKGGLKTDGFFKTSLPDVYAIGDVATFPMKLYNEMRRVEHVDHARKSAEQAVKAIKAAEEGNSIPEYDYLPYFYSRAFDLSWQFYGDNVGESVLFGDNDPKSPKPKFGSYWIKEGKVVGAFLEG…
					Araha.7913s0002.1	AhaMDAR2	442	Yes	Yes	No	No	-	No	-	-	Class III (cyt/per)	MAEEKSYKYVIIGGGVAGGYAAREFSNQGLKPGELAIISKEPVPPFERPELTKAYIDLEVNPTLAKIYVCAGTGEAKQYPNWYKEKGIDLIVSTEIVKADLASKTLVSDDGKIYKYQTLLIATGSTNIRLSEIGVQEADVKNIFYLREIEDSDELSLAMELYVQRGKAVVIGGGFLGLEISSALRANNHEVTMVFPEPWIIHRFFTAEIASFYEGYCANKGIKIIKGTVATGFSTNSDGEVTEVKLEDGRTLEANIVVAGVGARPVTSLFKGQVEEEKGGIKTDGFFKTSVPDVYALGDVATFPMKMYGGMRRVEHADNARKSAAQAVKQAIKAAEEGKTIPDYDYLPYFYSRFFNLSWEFYGDNVGESVLFGDNDPKSPKPKFGTYWVKDGKVVGVFL…
					Araha.22753s0002.1	AhaMDAR3	488	Yes	Yes	No	459-481	Yes	No	-	-	Class II (per mem)	MGRAFVYVILGGGVAAGYAALEFTRRGVSDGELCIISEEPVAPYERPALSKGFLLPEAPARLPSFHTCVGANDEKLTPKWYKDHGIELVLGTRVKSVDVRRKTLLSSTGETISYKFLIIATGARPLKLEEFGVEGSDAENVCYLRDLADANRLATVIQSSSNGNAVVIGGGYIGMECAASLVINKINVTMVFPEAHCMARLFTPKIASLYEDYYRAKGVKFVKGTVLTSFEFDSNKKVTAVNLKDGSHLPADLVVVGIGIRPNTSLFEGQLTIEKGGIKVNSRMQSSDSSVYAIGDVATFPVKLFGEMRRLEHVDSARKSARHAVSAIMDPIKTGEFDYLPFFYSRVFAFSWQFYGDPTGDVVHFGEYEDGKSFGAYWVKKGHLVGSFLEGGTKEEYET…
					Araha.5636s0005.1	AhaMDAR4	486	Yes	Yes	No	No	-	Yes	Chl (0.813)	chlo: 9, mito: 5	Class I (chl/mit)	MALASTTLPTKSGLSLWCPSSPSLARRFPARFSPIGSRIASRGLVTASFANENREFVIVGGGNAAGYAARTFVENGMADGRLCIVTKEAYAPYERPALTKAYLFPPEKKPARLPGFHTCVGGGGERQTPDWYKEKGIEVIYEDPVTGANFEKQTLTTDTGKQLKYGSLIIATGCTASRFPDKIGGNLPGVHYIREVADADSLISSLGKAKKVVIVGGGYIGMEVAAAAVAWNLDTTIVFPEDQLLQRLFTPSLAQKYEELYRQNGVKFVKGASINNLEAGSDGRVSAVKLADGSTIEADTVVIGIGAKPAIGPFETLAMNKSIGGIQVDGLFRTSTPGIFAIGDVAAFPLKIYDRMTRVEHVDHARRSAQHCVKSLLTAHTDTYDYLPYFYSRVFEYEG…
					Araha.17452s0005.1	AhaMDAR-like	404		No								MAEKSFKYIILGGGVSAGYAAKEFANQGVKPGELAVISKEAVAPYERPALSKGYLFPEGAARLPGFHCCVGSGGEKLLPESYKQKGIELILSTEIVKADLAAKSLVSAAGDVFKYQTLIIATGSTVLRLTDFGVKGADSKNILYLREIDDADQLVEAIKVKKGGKAVVVGGGYIGLELSAALRINNFDVTMVFPEPWCMPRLFTADIAAFYETYYTNKGVKIIKGTVASGFTAQPNGEVKEVQLKDGRTLEADIVIVGVGAKPLTSLFKGQVEEDKGGIKTDAFFKTSVPDVYAVGDVATFPLKMYGDVRRVEHVDHSRKSAEQAVKFYGDNVGDSVLFGDSNPSNPKPRFGAYWVQGGKVVGAFMEGGSGDENKALAKVAKARPSAESLEELTKQGIS…
			Arabidopsis lyrata v2.1 proteome	5	AL5G33650.t1	AlyMDAR1	442	Yes	Yes	AKI	No	-	No	-	-	Class III (cyt/per)	MAEKSFKYIILGGGVSAGYAAKEFANQGVKPGELAVISKEAVAPYERPALSKGYLFPEGAARLPGFHCCVGSGGEKLLPESYKQKGIELILSTEIVKADLAAKSLVSAAGDVFKYQTLIIATGNVTLYYFLCRLFRLTDFGVKGADSKNILYLREIDDADKLVEAIKAKKGGKAVVVGGGYIGLELSAALRINNFDVTMVFPEPWCMPRLFTADIAAFYETYYTNKGVKIIKGTVASGFTAQPNGEVKEVQLKDGRTLEADIVIVGVGAKPLTSLFKGQVEEDKGGIKTDAFFKTSVPDVYAVGDVATFPLKMYGDVRRVEHVDHSRKSAEQAVKAIKAAEGGAAVEEYDYLPFFYSRSFDLSWQFYGDNVGDSVLFGDSNPSNPKPRFGAYWVQGGKV…
					AL6G13140.t1	AlyMDAR2	435	Yes	Yes	No	No	-	No	-	-	Class III (cyt/per)	MAEEKSFKYVIVGGGVSAGYAAREFFKQGVKPGELAIISREQVPPYERPALSKGYIHLENKATLPNFYVAAGSGGERQFPQWYKEKGIELILGTEIVKADLAAKTLVSGTGQVFKYQTLLAATGSSVIRLSDFGVPGADAKNIFYLRELEDADYLAYAMETKEKGKAVVVGGGYIGLELSAALKANNLEVTMVYPEPWCMPRLFTAGIASFYEGYYANKGINIVKGTVASGFSTNSNGEVTEVKLKDGRTLEADIVIVGVGGRPIISLFKGQVEEEKGALKTDGFFKTSLPDVYAIGDVATFPMKLYNEMRRVEHVDHARKSAEQAVKAIKAAEEGNSIPEYDYLPYFYSRAFDLSWQFYGDNVGESVLFGDNDPKSPKPKFGSYWIKEGKVVGAFLEG…
					AL3G21220.t1	AlyMDAR3	439	Yes	Yes	No	No	-	No	-	-	Class III (cyt/per)	MAEEKSYKYVITGGGVAGGYAAREFSNQGLKPGELAIISKEPVHPFERPELTKTYIDLEVNPTLANIYVCAGTGEAKQYPNWYKEKGIDLIVSTEIVKADLASKTLVSDDGKIYKYQTLLIATGSTNIRLSEIGVQEADVKNIFYLREIEDSDELSFAMELYVQRGKAVVIGGGFLGLEISSALRANNHEVTMVFPEPWIIHRFFTAEIASFYEGYCANKGIKIIKGTVATGFSTNSDGEVTEVKLEDGRTLEANIVVAGVGARPVTSLFKGQLEEEKGGIKTDGFFKTSVPDVYALGDVATFPMKMYGGMRRVEHADNARKSAAQAVKAIKAAEEGKTIPDYDYLPYFYSRFFNLSWKFYGDNVGESVLFGDNDPKSPKPKFGTYWVKDGKVVGVFLE…
					AL5G17240.t1	AlyMDAR4	488	Yes	Yes	No	459-481	Yes	No	-	-	Class II (per mem)	MGRAFVYVILGGGVAAGYAALEFTRRGVSDGELCIISEEPVAPYERPALSKGFLLPEAPARLPSFHTCVGANDEKLTPKWYKDHGIELVLGTRVKSVDVRRKTLLSSTGETISYKFLIIATGARPLKLEEFGVEGSDAENVCYLRDLADANRLATVIQSSSNGNAVVIGGGYIGMECAASLVINKINVTMVFPEAHCMARLFTPKIASLYEDYYRAKGVKFVKGTVLTSFEFDSNKKVTAVNLKDGSHLSADLVVVGIGIRPNTSLFEGQLTIEKGGIKVNSRMQSSDSSVYAIGDVATFPVKLFGEMRRLEHVDSARKSARHAVSAIMDPIKTGEFDYLPFFYSRVFAFSWQFYGDPTGDVVHFGEYEDGKSFGAYWVKKGHLVGSFLEGGTKEEYET…
					AL2G11170.t2	AlyMDAR5	493	Yes	Yes	No	No	-	Yes	Mit (0.777)	chlo: 13	Class I (chl/mit)	MSAVRRVMALASTTLPTRSGLSLWCPSSPSLARRFRARFSPIGSRIASRGLVTASFANENREFVIVGGGNAAGYAARTFVENGMADGRLCIVTKEAYAPYERPALTKAYLFPPEKKPARLPGFHTCVGGGGERQTPDWYKEKGIEVIYEDPVTGANFEKQTLTTDTGKQLKYGSLIIATGCTASRFPDKIGGSLPGVHYIREVADADSLIASLGKAKKVVIVGGGYIGMEVAAAAVAWNLDTTIVFPEDQLLQRLFTPSLAQKYEELYRQNGVKFVKGASINNLEAGSDGRVSAVKLADGSTIEADTVVIGIGAKPAIGPFETLAMNKSIGGIQVDGLFRTSTPGIFAIGDVAAFPLKIYDRMTRVEHVDHARRSAQHCVKSLLTAHTDTYDYLPYFYS…
			Arabidopsis thaliana TAIR10 genome	5	AtMDAR1.1 (AT3G52880.1)	AthMDAR1	434	Yes	Yes	AKI	No	-	No	-	-	Class III (cyt/per)	MAEKSFKYIILGGGVSAGYAAKEFANQGVQPGELAVISKEAVAPYERPALSKGYLFPEGAARLPGFHCCVGSGGEKLLPESYKQKGIELILSTEIVKADLSAKSLVSATGDVFKYQTLIIATGSTVLRLTDFGVKGADSKNILYLREIDDADKLVEAIKAKKGGKAVVVGGGYIGLELSAVLRINNLDVTMVFPEPWCMPRLFTADIAAFYETYYTNKGVKIIKGTVASGFTAQPNGEVKEVQLKDGRTLEADIVIVGVGAKPLTSLFKGQVEEDKGGIKTDAFFKTSVPDVYAVGDVATFPLKMYGDVRRVEHVDHSRKSAEQAVKAIKAAEGGAAVEEYDYLPFFYSRSFDLSWQFYGDNVGDSVLFGDSNPSNPKPRFGAYWVQGGKVVGAFMEGG…
					AtMDAR2 (AT5G03630.1)	AthMDAR2	435	Yes	Yes	No	No	-	No	-	-	Class III (cyt/per)	MAEEKSFKYVIVGGGVAAGYAAREFFNQGVKPGELAIISREQVPPYERPALSKGYIHLENKATLPNFYVAAGIGGERQFPQWYKEKGIELILGTEIVKADLAAKTLVSGTGQVFKYQTLLAATGSSVIRLSDFGVPGADAKNIFYLRELEDADYLAYAMETKEKGKAVVVGGGYIGLELGAALKANNLDVTMVYPEPWCMPRLFTAGIASFYEGYYANKGINIVKGTVASGFTTNSNGEVTEVKLKDGRTLEADIVIVGVGGRPIISLFKDQVEEEKGGLKTDGFFKTSLPDVYAIGDVATFPMKLYNEMRRVEHVDHARKSAEQAVKAIKAAEEGNSIPEYDYLPYFYSRAFDLSWQFYGDNVGESVLFGDNDPESPKPKFGSYWIKERKVVGAFLEG…
					AtMDAR3.1 (AT3G09940.1)	AthMDAR3	441	Yes	Yes	No	No	-	No	-	-	Class III (cyt/per)	MAEEKSYKYVIIGGGVAGGYAAREFSNQGLKPGELAIISKEPVPPFERPELTKVYIDLEVNPTLANIYVCAGTGEAKQYPNWYKEKGIDLIVGTEIVKADLASKTLVSDDGKIYKYQTLLIATGSTNIRLSEIGVQEADVKNIFYLREIEDSDELALAMELYVQRGKAVIIGGGFLGLEISSALRANNHEVTMVFPEPWLVHRFFTAEIASFYESYYANKGIKIIKGTVATGFSTNSDGEVTEVKLEDGRTLEANIVVAGVGARPATSLFKGQLEEEKGGIKTDGFFKTSVPDVYALGDVATFPMKMYGGTRRVEHADNARKSAAQAVKAIKAGEEGKTIPDYDYLPYFYSRFFKLSWEFYGENVGESVLFGDNDPKSPKPKFGTYWVKDGKVVGVFLE…
					At-MDAR4 (AT3G27820.1)	AthMDAR4	488	Yes	Yes	No	459-481	Yes	No	-	-	Class II (per mem)	MGRAFVYVILGGGVAAGYAALEFTRRGVSDGELCIISEEPVAPYERPALSKGFLLPEAPARLPSFHTCVGANDEKLTPKWYKDHGIELVLGTRVKSVDVRRKTLLSSTGETISYKFLIIATGARALKLEEFGVEGSDAENVCYLRDLADANRLATVIQSSSNGNAVVIGGGYIGMECAASLVINKINVTMVFPEAHCMARLFTPKIASLYEDYYRAKGVKFIKGTVLTSFEFDSNKKVTAVNLKDGSHLPADLVVVGIGIRPNTSLFEGQLTIEKGGIKVNSRMQSSDSSVYAIGDVATFPVKLFGEMRRLEHVDSARKSARHAVSAIMDPIKTGDFDYLPFFYSRVFAFSWQFYGDPTGDVVHFGEYEDGKSFGAYWVKKGHLVGSFLEGGTKEEYET…
					AtMDAR5.2 (AT1G63940.2)	AthMDAR5	493	Yes	Yes	No	No	-	Yes	Chl (0.755)	chlo: 12, mito: 2	Class I (chl/mit)	MSAVRRVMALASTTLPTKSGLSLWCPSSPSLARRFPARFSPIGSRIASRSLVTASFANENREFVIVGGGNAAGYAARTFVENGMADGRLCIVTKEAYAPYERPALTKAYLFPPEKKPARLPGFHTCVGGGGERQTPDWYKEKGIEVIYEDPVAGADFEKQTLTTDAGKQLKYGSLIIATGCTASRFPDKIGGHLPGVHYIREVADADSLIASLGKAKKIVIVGGGYIGMEVAAAAVAWNLDTTIVFPEDQLLQRLFTPSLAQKYEELYRQNGVKFVKGASINNLEAGSDGRVSAVKLADGSTIEADTVVIGIGAKPAIGPFETLAMNKSIGGIQVDGLFRTSTPGIFAIGDVAAFPLKIYDRMTRVEHVDHARRSAQHCVKSLLTAHTDTYDYLPYFYS…
			Brassica oleracea capitata v1.0 proteome	4	Bol025074	BolMDAR1	434	Yes	Yes	AKI	No	-	No	-	-	Class III (cyt/per)	MAEKSFKYIILGGGVSAGYAAKEFASQGVKPGELAVISKEAVAPYERPALSKGYLFPEGAARLPGFHCCVGSGGEKLLPESYKQKGIELILRTEIVKADLAAKSLVSAAGDVFKYETLIIATGSTVLRLTDFGVKGADSKNILYLREIDDADKVVEAIQAKKGGKAVVVGGGYIGLELSAALRINNFDVTMVFPEPWCMPRLFTADIAAFYETYYTNKGVKIIKGTVASGFTAHPNGEVNEVQLKDGRSLEADIVIVGVGAKPLTALFKGQVEEDKGGIKTDAFFKTSVPDVYAVGDVATFPLKMYGDMRRVEHVDHSRKSAEQAVKAIKAAEGGGAVEEYDYLPFFYSRSFDLSWQFYGDNVGDSVLFGDSNPSNPKPRFGAYWVQDGKVVGAFMEGG…
					Bol015326	BolMDAR2	435	Yes	Yes	No	No	-	No	-	-	Class III (cyt/per)	MAEEKSFKYVIVGGGVAAGYAAREFSKQGLKPGELAIISREPVPPYERPALSKGYINLENKASLPNFYVCAGSGGEKQFPQWYKDNGIELLLETEIVKADLASKTLVSGTGQVFKYQTLIAATGSSVTRLSDFGVEGADAKNIFYLRELLDADELVTAMNVKANGKAVVVGGGYIGLELSSALKVNNMEVTMVYPEPWCMPRLFTAGIASFYEGFYANKGINIVKGTVAAGFSTNSDGEVTEVILKDGRTLEADIVIVGVGARPIISLFKGQVDEEKGGLKTDAFFRTSVPDVYAVGDIATFPMKLYNDMRRVEHVDHARKSAEQAVKAIKAAEEGNSVPEYDYLPYFYSRAFNLSWQFYGDNVGETVLFGDNDPTSAKPKFGSFWIKDGKLIGAFLEG…
					Bol042925	BolMDAR3	487	Yes	Yes	No	458-480	Yes	No	-	-	Class II (per mem)	MGRAFVYVILGGGVAAGYAALEFTRRGVSEGELCIISEEPVAPYERPALSKGFLLPEDPARLPSFHTCVGANDEKLTPKWYKEHGIELVLGTRVKSVDVRRKTLLSSTGETISYKFLIIATGARALKLEEFGVEGSDAENVCYLRDLSDANRLATAIQSSANGNAVVIGGGYIGMECAASLVINKINVTMVFPEAHCMARLFTPKIASLYEDYYRAKGVEFIKGTVLTSFEFDSDKKVTAVNLKNGNHLPADLVVVGIGIRPNTSLFEGQLTIEKGGIKVNSKMQSSDSSVYAIGDVATFPVKLFGEMRRLEHVDSARKSARHAVSAIMEPEKTGEFDYLPFFYSRVFAFSWQFYGDPVGEVVHFGEFEEGKTFGAYWIKKGHLVGSFLEGGTKEEYDT…
					Bol031191	BolMDAR4	490	Yes	Yes	No	461-483	Yes	No	-	-	Class II (per mem)	MGRAFVYVIVGGGVAAGYAALEFTRKGVSDGELCIISDEPVAPYERPALSKGFLLPEDPTRLPSFHTCVGANDEILTPKWYKEHGIELVLGTRVKSVDARRLTLVTSTGETITYNFLIIATGARALKLEEFGVEGSDAENVCYLRDLSDADRLATVIQSSSNGNAVVIGGGYIGMECAASLVINKINVTMVLAGAHCMARLFTPKIATFYEDYYMGKGVKFIKGTVLTSFEFDSDKKVTAVNLKDGNQLPADLVVVGIGIRPNISLFEGQLTIEKGGIKVNSQMQSSESSVYAIGDVATFPVKLYGEMRRLEHVDFARKSARHAVSAIMEPEKTGEFDYLPCFYSRFFAFSWQFYGDHVGEVVHFGEYEDGEVFGAYWVKEGHLVGCFLEGGTKEQYET…
			Brassica rapa FPsc v1.3 proteome	5	Brara.I03587.1	BraMDAR1	434	Yes	Yes	AKI	No	-	No	-	-	Class III (cyt/per)	MAEKSFKYIILGGGVSAGYAAKEFASQGVKPGELAVISKEAVAPYERPALSKGYLFPEGAARLPGFHCCVGSGGEKLLPESYKQKGIELILSTEIVKADLAAKSLVSAAGDVFKYETLIIATGSTVLRLTDFGVKGADSKNILYLREIDDADKVVEAIQAKKGGKAVVVGGGYIGLELSAALRINNFDVTMVFPEPWCMPRLFTADIAAFYETYYTNKGVKIIKGTVASGFTAHPNGEVNEVQLKDGRSLEADIVIVGVGAKPLTALFKGQVEEDKGGIKTDAFFKTSVPDVYAVGDVATFPLKMYGDMRRVEHVDHSRKSAEQAVKAIKAAEGGGAVEEYDYLPFFYSRSFDLSWQFYGDNVGDSVLFGDSNPSNPKPRFGAYWVQDGKVVGAFMEGG…
					Brara.C00125.1	BraMDAR2	435	Yes	Yes	No	No	-	No	-	-	Class III (cyt/per)	MAEEKSFKYVIVGGGVAAGYAAREFSKQGLKPGELAIISREPVPPYERPALSKGYINLENKASLPGFYVCAGSGGEKQFPQWYKDNGIELLLDTEIVKADLAAKTLVSGTGQVFKYQTLVAATGSSVTRLSDFGVEGADAKNIFYLRELLDADELVTAMNVKANGKAVVVGGGYIGLELSSALKVNNMEVTMVYPEPWCMPRLFTAGIASFYEGFYANKGINIVKGTVAAGFSTNSDGEVTEVILKDGRTLEADIVIVGVGARPIISLFKGQVEEDKGGLKTDAFFRTSVPDVYAVGDIATFPMKLYNEMRRVEHVDHARKSAEQAVKAIKAAEEGNSIPEYDYLPYFYSRAFTLSWQFYGDNVGETVLFGDNDPTSAKPKFGSFWIKDGKLIGAFLEG…
					Brara.F03182.1	BraMDAR3	487	Yes	Yes	No	458-480	Yes	No	-	-	Class II (per mem)	MGRAFVYVILGGGVAAGYAALEFTRRGVSEGELCIISEEPVAPYERPALSKGFLLPEDPARLPSFHTCVGANDEKLTPKWYKEHGIELVLGTRVKSVDVRRKTLLSSTGETISYKFLIIATGARALKLEEFGVEGSDAENVCYLRDLSDANRLATAIESSANGNAVVIGGGYIGMECAASLVINKINVTMVFPEAHCMARLFTPKIASLYEDYYSAKGVEFIKGTVLTSFEFDSNKKVTAVNLKNGNHLPADLVVVGIGIRPNTSLFEGQLTIEKGGIKVNSKMQSSDSSVYAIGDVATFPVKLFGEMRRLEHVDSARKSARHAVSAIMEPEKTGEFDYLPFFYSRVFAFSWQFYGDPVGEVVHFGEFEEGKTFGAYWIKKGHLVGSFLEGGTKEEYDT…
					Brara.B03313.1	BraMDAR4	490	Yes	Yes	No	461-483	Yes	No	-	-	Class II (per mem)	MGRAFVYVIVGGGVAAGYAALEFTRKGVSDGELCIISDEPVAPYERPALSKGFLLPEDPTRLPSFHTCVGANDEILTPKWYKEHGIELVLGTRVKSVDARRLTLVTSTGETITYNFLIIATGARALKLEEFGVEGSDAENVCYLRDLSDADRLATAIQSSSNGNAVVIGGGYIGMECAASLVINKINVTMVLAGAHCMARLFTPKIATFYEDYYMGKGVKFIKGTVLTSFEFDSDKKVTAVNLKDGNQLPADLVVVGIGIRPNISLFEGQLTIEKGGIKVNSQMQSSESSVYAIGDVATFPVKLYGEMRRLEHVDFARKSARHAVSAIMEPEKTGEFDYLPCFYSRFFAFSWQFYGDHVGEVVHFGEYEDGKVFGAYWVKEGHLVGCFLEGGTKEQYET…
					Brara.I01266.1	BraMDAR5	483	Yes	Yes	No	No	-	Yes	Chl (0.787)	chlo: 9, mito: 5	Class I (chl/mit)	MALASTTLPAKTGLSLWCPTSPSLARRLPVRFSSRIASRGLVTASFANENREFVIIGGGNAAGYAARTFVENGMADGRLCIVTKEAYAPYERPALTKAYLFPPEKKPARLPGFHTCVGGGGERQTPDWYKEKGIEMIYEDPVTGADFEKQTLTTNTGKQLKYGSLIIATGCTASRFPDKIGGNLPGVHYIREVADADSLISSLGKSKKVVIVGGGYIGMEVAAAAVAWNLDTTIVFPEDQLLQRLFTPSLAQRYEELYRQNGVKFVKGASINNLEAGSDGRVTAVKLADGSTIEADTVVIGIGAKPAIGPFETLSMNKSIGGIQVDGLFRTSTPGIFAIGDVAAFPLKIYDRMTRVEHVDHARRSAQHCVKSLLTAHTDTYDYLPYFYSRVFEYEGSSR…
					Brara.C03253.1	BraMDAR-like	408	No	No								MAEEKSFNFKYVIFGADVSAGYAAREFARQGLKHGELAIISNEPAVCIELILSTEIIKADLSTKSLFSTDGTIFKYQTMIVATGSTCVRLSECGFQDTNAKNVFYLRDIKDVDQLTLTMETKKKRKVVVIGGGYRGFEVSASLTVNNYEVTMVFPEPWIMHWLFSAEIASFYEGYYANKGIKIIKSTKATGFITNSNGEVTEVKLDDSRTIEADMVIVDIGGRPMISLFKGQVEEEKGGIKTDGFFKTSVTSVYAIGDVATFPMKLYGDMRRVEHVNHAFKSAEQAVMAIKAAEEGRSIQEYDYLPFFNSRAFDLSWQFYGDNVGQSVIFGDNDPNSPKAKFGTYWVKDGKVVGAFLEGGVVEENKAIARVARTQPSVGSLEVLSNVGELLIGSRVNRN…
			Capsella grandiflora v1.1 proteome	5	Cagra.0612s0007.1	CgrMDAR1	434	Yes	Yes	AKI	No	-	No	-	-	Class III (cyt/per)	MIVIGYAAKEFANQGVKPGELAVISKEAVAPYERPALSKGYLFPEGAARLPGFHCCVGSGGEKLLPESYKQKGIELILSTEIVKADLAAKSLVSAAGDVFKYQTLIIATGSTVKTHILAFFTSESVLRLTDFGVKGADSKNILYLREIDDADKLVEAIKAKKGGKAVVVGGGYIGLELSAALRINNFDVTMVFPEPWCMPRLFTADIAAFYETYYTNKGVKIIKGTVASGFTAHSSGEVKEVQLKDGRTLEADIVIVGVGAKPLTSLFKGQVEEDKGGLKTDAFFKTSVPDVYAVGDVATFPMKMYGDVRRVEHVDHSRKSAEQAVKAIKAAEGGAAVEEYDYLPFFYSRSFDLSWQFYGDNVGDSVLFGDSNPANPTPRFGAYWVQGGKVVGAFMEGG…
					Cagra.0154s0039.1	CgrMDAR2	435	Yes	Yes	No	No	-	No	-	-	Class III (cyt/per)	MTEEKSFKYVIVGGGVAAGYAAREFFKQGVKPGELAIISKEQVPPYERPALSKGYIHLDNKATLPNFYVCAGSGGERQFPMWYKEKGIELILATEIVKADLASKTLVSGTGQVFKYQTLLAATGSSVIRLSDFGVPGADAKNIFYLRELEDADYLAYAMEVKEKGKAVVVGGGYIGLELSAALKANNLDVTMVYPEPWCMPRLFTAGIASFYEGYYANKGINIVKGTVASGFTTNSNGEVTEVKLKDGRTLEADIVIVGVGGRPIISLFKGQVEEEKGGLKTDGFFKTSNPDVYAIGDVATFPMKLYNEMRRVEHVDHARKSAEQAVKAIKAAEEGNSIPDYDYLPYFYSRAFDLSWQFYGDNVGESVMFGDNDPKSPKPKFGSYWIKDGKVVGAFVEG…
					Cagra.4686s0005.1	CgrMDAR3	441	Yes	Yes	No	No	-	No	-	-	Class III (cyt/per)	MAEEKSYKYVIIGGGVAGGYAAREFKKQGLKPGELAIISREAVSPFERPELTKVYIDLSVNPTLASIYCCAGTGEEKQYPHWYKQNGIDLIVSTEIVKADLASKTLVSDDGTIYKYQTLLIATGSTCIRLAEHGIPEADVKNIFYLREIDDNDELSLAMELYVQKGQAVVIGGGFLSLEMSSSLKANNHEVTMVFPEPWILNRFFTPEMSAFYESYLINKGIKIIKGTAVTGFNTNSDGVVTEVKLDDGTTLDANIVVAGVGAKPATSLFKGQIEELNGGLKTDGFFKTSVPDVYALGDVATFPMKMYGEMRRVEHADNARKSAGHAVKAIKAAEEGKTVPDYDYLPYFYSRFFDLSWQFYGDNVGESVMFGDTDPKSPKPKFGTYWVKDGKVVGVFLE…
					Cagra.5018s0003.1	CgrMDAR4	488	Yes	Yes	No	459-481	Yes	No	-	-	Class II (per mem)	MGRAFVYVILGGGVAAGYAALEFTRRGVSDGELCIISEEPVAPYERPALSKGFLLPEAPARLPSFHTCVGANDEKLTPKWYKDHGIELVLGTRVKSVDVRRKTLLSSTGETISYKFLIIATGARALKLEEFGVEGSDAENVCYLRDLADANRLATVIQSSSNGNAVVIGGGYIGMECAASLVINKINVTMVFPEAHCMARLFTPKIATLYEDYYRAKGMKFIKGTVLTSFEFDSNGKVTAVNLKDGNQLPADLVVVGIGIRPNTSLFEGQLTIEKGGIKVNSKMQSSDSSVYAIGDVATFPVKLFGEMRRLEHVDSARKSARHAVSSIMDPVKTGEFDYLPFFYSRVFAFSWQFYGDPTGEVVHFGDYEDGKSFGAYWVKKGHLVGSFLEGGTKEEYEI…
					Cagra.9323s0002.1	CgrMDAR5	486	Yes	Yes	No	No	-	Yes	Chl (0.827)	chlo: 9, mito: 5	Class I (chl/mit)	MALASSTLPTKSGLSLWCPSSPSLARRFPARFSPIGSRIASRGLVTASFANENREFVIVGGGNAAGYAARTFVENGMADGRLCIVTKEAYAPYERPALTKAYLFPPEKKPARLPGFHTCVGGGGERQTPDWYKEKGIEVIYEDPVTGADFGKQTLTTDTGKQLKYGSLIIATGCTASRFPDKIGGNLPGVHYIREVADADSLISSLGKAKKVVIVGGGYIGMEVAAAAVAWNLDTTIVFPEDQLLQRLFTPSLAQKYEELYRQNGVKFVKGASINNLEAGSDGRVSAVKLADGSTIEADTVVIGIGAKPSIGPFETLAMNKNIGGIQVDGLFRTSTPGIFAIGDVAAFPLKIYDRMTRVEHVDHARRSAQHCVKSLLTAHTDMYDYLPYFYSRVFEYEG…
			Capsella rubella v1.0 proteome	5	Carubv10017290m	CruMDAR1	434	Yes	Yes	AKI	No	-	No	-	-	Class III (cyt/per)	MAEKTFKYIILGGGVSAGYAAKEFANQGVKPGELAVISKEAVAPYERPALSKGYLFPEGAARLPGFHCCVGSGGEKLLPESYKQKGIELILSTEIVKADLAAKSLVSAAGDVFKYQTLIIATGSTVLRLTDFGVKGADSKNILYLREIDDADKLVEAIKAKKGGKAVVVGGGYIGLELSAALRINNFDVTMVFPEPWCMPRLFTADIAAFYETYYTNKGVKIIKGTVASGFTAHSSGEVKEVQLKDGRTLEADIVIVGVGAKPLTTLFKGQVEEDKGGLKTDAFFKTSVPDVYAVGDVATFPMKMYGDVRRVEHVDHSRKSAEQAVKAIKAAEGGAAVEEYDYLPFFYSRSFDLSWQFYGDNVGDSVLFGDSNPANPTPRFGAYWVQGGKVVGAFMEGG…
					Carubv10000995m	CruMDAR2	435	Yes	Yes	No	No	-	No	-	-	Class III (cyt/per)	MAEEKSFKYVIVGGGVAAGYAAREFFKQGVKHGELAIISKEQVPPYERPALSKGYIHLDNKATLPNFYVCAGSGGERQFPMWYKEKGIELILATEIVKADLASKTLVSGTGQVFKYQTLLAATGSSVIRLSDFGVPGADAKNIFYLRELEDADYLAYAMEVKEKGKAVVVGGGYIGLELSAALKANNLDVTMVYPEPWCMPRLFTAGIASFYEGYYANKGINIVKGTVASGFTTNSNGEVTEVKLKDGRTLEADIVIVGVGGRPIISLFKGQVEEEKGGLKTDGFFKTSNPDVYAIGDVATFPMKLYNEMRRVEHVDHARKSAEQAVKAIKAAEEGNSIPDYDYLPYFYSRAFDLSWQFYGDNVGESVMFGDNDPKSPKPKFGSYWIKDGKVVGAFVEG…
					Carubv10013717m	CruMDAR3	441	Yes	Yes	No	No	-	No	-	-	Class III (cyt/per)	MAEEKSYKYVIIGGGVAGGYAAREFKKQGLKPGELAIISREAVSPFERPELTKVYIDLSVNPTLASIYCCAGTGEEKQYPHWYKQNGIDLIVSTEIVKADLASKTLVSDDGTIYKYQTLLIATGSTCIRLAEHGIPEADVKNIFYLREIDDNDELSLAMELYVQKGQAVVIGGGFLSLEMSSSLKANNHEVTMVFPEPWILNRFFTPEMSAFYEGYLINKGIKIIKGTAVTGFNTNSDGVVTEVKLDDGTTLDANIVVAGVGAKPATSLFKGQIEELNGGLKTDGFFKTSVPDVYALGDVATFPMKMYGEMRRVEHADNARKSAGHAVKAIKAAEEGKTVPDYDYLPYFYSRFFDLSWQFYGDNVGESVMFGDTDPKSPKPKFGTYWVKDGRVVGVFLE…
					Carubv10017107m	CruMDAR4	488	Yes	Yes	No	459-481	Yes	No	-	-	Class II (per mem)	MGRAFVYVILGGGVAAGYAALEFTRRGVSDGELCIISEEPVAPYERPALSKGFLLPEAPARLPSFHTCVGANDEKLTPKWYKDHGIELVLGTRVKSVDVRRKTLLSSTGETISYKFLIIATGARALKLEEFGVEGSDAENVCYLRDLADANRLATVIQSSSNGNAVVIGGGYIGMECAASLVINKINVTMVFPEAHCMARLFTPKIATLYEDYYRTKGVKFIKGTVLTSFEFDSNGKVTAVNLKDGNQLPADLVVVGIGIRPNTSLFEGQLTIEKGGIKVNSKMQSSDSSVYAIGDVATFPVKLFGEMRRLEHVDSARKSARHAVSSIMDPVKTGEFDYLPFFYSRVFAFSWQFYGDPTGEVVHFGDYEDGKSFGAYWVKKGHLVGSFLEGGTKEEYEI…
					Carubv10020187m	CruMDAR5	493	Yes	Yes	No	No	-	Yes	Chl (0.725)	chlo: 11, mito: 3	Class I (chl/mit)	MSPVRRVMALASTTLPTKSGLSLWCPSSPSLARRFPARFSPIGSRIASRGLVTASFANENREFVIVGGGNAAGYAARTFVENGMADGRLCIVTKEAYAPYERPALTKAYLFPPEKKPARLPGFHTCVGGGGERQTPDWYKEKGIEVIYEDPVTGADFGKQTLTTDTGKQLKYGSLIIATGCTASRFPDKIGGNLPGVHYIREVADADSLISSLGKAKKVVIVGGGYIGMEVAAAAVAWNLDTTIVFPEDQLLQRLFTPSLAQKYEELYRQNGVKFVKGASINNLEAGSDGRVSAVKLADGSTIEADTVVIGIGAKPSIGPFETLAMNKNIGGIQVDGLFRTSTPGIFAIGDVAAFPLKIYDRMTRVEHVDHARRSAQHCVKSLLTAHTDMYDYLPYFYS…
		Cucurbitaceae	Cucumis sativus v1.0 proteome	5	Cucsa.240950.1	CsaMDAR1	434	Yes	Yes	SKV	No	-	No	-	-	Class III (cyt/per)	MAEKSFKYVIVGGGVSAGYAAREFVKLGLKAGELAIISKEAVAPYERPALSKAYLFPESPARLPGFHVCVGSGGQRLLPGWYKENGIELILSTEIVKADLAAKSLTTASGETFKYQILVIATGSTVIKLSDFGVEGADAKNIFYLREIADADQLVEAIKSKKNGKAVLVGGGYIGLELGAALKINDLDVTMIYPEPWCMPRLFTSGIASFYEGFYKNKGINIIKGTVATGFTSDSNGEVKQVKLKDGRTLDADIVVVGVGGRPLVSLFKGQVEEDKGGIKTDGFFKTSIPDVYAVGDVATYPLKLYNELRRVEHVDHARKSAEQAVKAIKAQEEGKSIEEYDYLPYFYSRTFNLAWQFYGDNVGETVLFGDNNPESPKPKFGTYWIKDGKVVGVFLEGG…
					Cucsa.083200.1	CsaMDAR2	434	Yes	Yes	SKV	No	-	No	-	-	Class III (cyt/per)	MADETFKYVILGGGVAAGYAAREFVKQGLNPGELAIISKEAVAPYERPALSKAYLFPESPARLPGFHVCVGSGGERLLPDWYKEKGIELILSTEIVEADLPAKRLRSAHGKIYNYQTLIIATGSTVIKLSDFGVQGADAKNIFYLREIDDADQLVEAIKAKENGKVVVVGGGYIGLELGAALRINNFDVSMVYPEPWCMPRLFTPEIAAFYEGYYAQKGITIIKGTVAVGFTVDTNGEVKEVKLKDGRVLEADIVVVGVGARPLTSLFKGQIVEEKGGIKTDEFFKTSVPDVYAVGDVATFPLKLYNELRRVEHVDHSRKSAEQAVKAIKASEEGKAIEEYDYLPYFYSRSFDLSWQFYGDNVGDAVLFGDNSPDSATHKFGSYWIKDGKVVGAFLESG…
					Cucsa.074510.1	CsaMDAR3	552	Yes	Yes	No	No	-	Yes	Other (0.689)	chlo: 6, cyto: 6, pero: 2	Class III (cyt/per)	MGQLFSTRMAGIWDRIDKKLKCYREFEENLSVLQKLARELSFQLEELEHTSTSERSEQWEEEVEDLIEEVEDLERSILKWKLLTVAVYLYGRTVVEKIDEAKELLEEGNYLFPNCFKYLILGGGVAAGYAAREFSKRGVKPGELGIISEESVAPYERPALSKGYLFPRNPSRLPQFHVCVGSGGERLGLNWYEEKGIELILNTKIVKTDLKSKTLTSEDGSVFKFGTLIIATGSGVVKLSDFGVKGDQAKNVLYLRDVKDADKVVEAMKAKKNGKAVVVGGGYIGLEVGAVLRQNNLNVTMVYPGHWCMSRLFTKEIAEFYERYYTSKGIKLVKETSVIELEADPNGEVKKVKLKNGRELEADVVVVGVGARPATGLFQGQLEMNKGGIKTDGLFKTSV…
					Cucsa.011450.1	CsaMDAR4	480	Yes	Yes	No	452-474	Yes	No	-	-	Class II (per mem)	MGRAFVYVILGGGVAAGYAALEFTKRGVSRGELCIISEETVAPYERPALSKGYLLPEAPARLPAFHTCVGANEERLTPKWYKEHGIELVLGTRVISADVRRRTLLTAAGETISYKILIVATGARALKLEEFGVNGSDAENVCYLRDLNDANRAVDVMHSCSGGNAVVIGGGYIGMECAASLVINKINVTMVFPEAQCMPRLFTPKIASFYEDYYKSKGVEFVKGTVLSSFDMDSNGKVVAVNLRDGKRLPVDMVVVGIGIRPNTSLFEGQLTLEKGGIKVNGKMQSSNSSVYAVGDVAAFPVKIFSETRRLEHVDSARKCARHAVAAIMEPEKTGDFDYVPFFYSRIFALSWQFYGDNIGEVVYFGDFSGNTFGAYWVNKGHLVGSFLEGGTKEEYAAI…
					Cucsa.303450.1	CsaMDAR5	479	Yes	Yes	No	No	-	Yes	Chl (0.790)	chlo: 10, mito: 4	Class I (chl/mit)	MAAASNSLSLKHSLSLWCPHSTSFSLHHQQPSSVAFRGFRRSYVSASSDFANDNREFVIVGGGNAAGYAARTFVEHGMADGRLCIVSKEAFAPYERPALTKGYLFPLDKKPARLPGFHTCVGSGGERQTPEWYKDKGIETFYQDPVMGIDIKDQTLRTNSGKLLKYGALFIATGCTASRFPDKIGGGLPGVHYIRDVADADSLISSLEKAKKVVVVGGGYIGMEVAAAAVGWKLDTTIIFPENHLLQRLFTPSLAKKYEEFLPGEWSGANGRVTSVRLADGSSIEADTVVIGIGAKPAVGPFEQVGLNSTVGGIQVDGLFRTKVPGIFAVGDVAAFPLKLYDRVARVEHVDHARRSAQHCVKALLTAQTQTYDYLPYFYSRVFEYEGSPRKIWWQFFGD…
		Rosaceae	Fragaria vesca v1.1 proteome	4	mrna30243.1-v1.0-hybrid	FveMDAR1	520	Yes	Yes	SKI	No	-	Yes	SP (0.655)	chlo: 5, E.R.: 3, plas: 2, vacu: 2, nucl: 1	Class III (cyt/per)	MWCDDGEDRFNSIFILDCFSLLYFLADLGRWCIESKRWCSSDGGRHCWRGNGFGSNAFLALWVGLLVCGMRLEARALRHCKHEDEAASGGLGTDLEETGGDPWGYAAREFSKQGVKPGELAVISKEAVAPYERPALSKAYLFPESPARLPGFHTCVGSGGERLLPDWYKEKGIELILSTEIVIVDLAGKTLVSGTGETFKFQILIIATGSTVVRLSDFGVKGADAKNIFYLREIDDADKLNDAIKAKKNGKAVIVGGGYIGLELGAALRINNLDVTMVYPEPWCMPRLFTSGIAAFYEGYYANKGVKIIKGTVASGFTSDSNGEVKEVHLKDGRVLEADIVVVGVGGRPLTSLFKGQVEEEKGGIKTDTFFKTSVPDVYAVGDVATFPLKLYNELRRVE…
					mrna25004.1-v1.0-hybrid	FveMDAR2	867	Yes	Yes	No	No	-	Yes (very long)	Other (0.909)	cyto: 7, pero: 3, nucl: 1.5, cysk_nucl: 1.5, chlo: 1	Class III (cyt/per)	MGIWDAISGTTDSLKRNAPDLTAVKGWCPTTDSLKRIALDGTAAKNVCSAAYGYGSSAVTKVDGAVRGNLIPYVCNEVAWSKIAQLGTIVAKNATYEAFKLVPGGSAFYNIGAMSIYDFNNSNKQELDGKALQAKLLRLEKELSEYKELNKPCADLKSPSVANVHSNARQKPEDMESESAYGSNIHSVGTRKPEDVIRVFIMKEFIFRQFCDDIMVPDRGSDRSELGQSWGCGVAWGGHGGLPWRGHASGGSRGQSDEVGGGWRWFGLGWASASVAENRWTTTSGHARRVLCVYAGYKVEEDRVGSAKRNLPMALLKPITETILLIWTLITGWLKYHRNLEGNMELLKRLLEELESQTADIEQKLDAEPPHPIKRQEDEVCEWLENAERIKTEVQTIFQ…
					mrna28434.1-v1.0-hybrid	FveMDAR3	496	Yes	Yes	No	467-489	Yes	No	-	-	Class II (per mem)	MTQKDELFYSESEEEEEEMGRAFVYVILGGGVAAGYAALEFTRRGISHGELCIISEEPVPPYERPALSKGFLLPEAPSRLPSFHTCVGANEEKLTPKWYKEHGIELVLGTRVKSVDVRRKTILTGSGETITYKILVIATGARALKLEEFGVKGSDSENVCYLRNLADANRLVNLVQSCPGGNAVVIGGGYIGMECAASLVINRVNVTMVFPEEHCMARLFTPKIASYYEEFYKSKGVNFVKGTILSSFDIDPNGKVTAVNLRDGSCLPADMVVVGIGIRPNTSLFEGQLTLEKGGIKVNGKMQSSNSSVYAVGDVAAFPVKLFGDSRRLEHVDSARKTARHAVAAIMEPSKAVEFDYLPFFYSRVFTLSWQFYGDNIGDVVHFGDFSGGTFGAYWVSNG…
					mrna31837.1-v1.0-hybrid	FveMDAR4	946	Yes	Yes	No	No		Yes (very long)	Other (0.702)	chlo: 4, mito: 4, E.R.: 4, nucl: 1	Class I (chl/mit)	MVATDNQNSFLNRISIRRNQVVTMEGNHDPEIEDLEHFQKHVADRFHDLLSPPDDYPSEPFLSIAWIRNLLDVFLCCEAEFKAVVLMGRDPTQITKPPLDRLVPEFLDRVVKALDICNAVSNGVESVRHFQKLAEIAVSALEQRPIGDGQVRRAKKALSSLVTAMAIEDKEGQTNKMTERTWSFGRRTGVSGSNKDRAAGHFRVLSWGMSKGWSAAKQIQAMSTNMVAPRGNETSSLVQPVYIMSTIMLFVMWILVTVVPCQERTGLMTHFPLPRNLVWAQSLIGLQDKIAEEWKKKEKKCAAGLMEEMQKMEKLGQSLIEFADSFQFPVEAGKLEEVAAQVAELAEICRRMEEGLVPLQQQIRELFHRAVRSRMEVLEVLDQGGKAKTETANHSATHP…
		Fabaceae	Glycine max Wm82.a2.v1 proteome	6	Glyma.10G067500.1	GmaMDAR1	433	Yes	Yes	SKI	No	-	No	-	-	Class III (cyt/per)	MAKTFKYIILGGGVSAGYAAREFAKQGVKPGELAIISKEAVAPYERPALSKAYLFPESPARLPGFHVCVGSGGERLLPEWYTEKGIELILSTEIVKVDLAAKSLISAGGETFSYQILIVATGSTVIRLTDFGVEGADAKNIFYLREVDDADKLYAAIKAKKNGKAVVVGGGYIGLELSAVLKLNNIDVTMVYPEPWCMPRLFTAGIAEFYEGYYANKGVNIIKGTVAVGFTSNSDGEVKEVKLKDGRVLEADIVVVGVGGRPQTVLVKGQVEEEKGGIKTDAFFKTNLSDVYAVGDVATFPLKLYGELRRVEHVDHSRKSAEQAVKAIKAAEEGKTVEEYDYLPYFYSRSFDLSWQFYGDNVGDTVLFGDNNPASSKPKFGTYWIKDGKVVGVFLEGGT…
					Glyma.11G209100.1	GmaMDAR2	433	Yes	Yes	SKI	No	-	No	-	-	Class III (cyt/per)	MAKTFKYIILGGGVSAGYAAREFAKQGVKPGELAIISKEAVAPYERPALSKAYLFPESPARLPGFHVCVGSGGERLLPEWYTEKGIELILSTEIVKVDLAAKSLISAGGETFSYQILIVATGSTVIRLTDFGVEGADAKNIFYLREVDDADKLYEAIKAKKNGKAVVVGGGYIGLELSAVLKLNNIDVTMVYPEPWCMPRLFTAGIAEFYEEYYKNKGVNIIKGTVAVGFTSNSDGEVKEVKLKDGRVLEADIVVVGVGGRPQTALVKGQVEEEKGGIKTDAFFKTNLSDVYAVGDVATFPLKLYGELRRVEHVDHSRKSAEQAVKAIKAAEEGRTVEEYDYLPYFYSRSFDLSWQFYGDNVGDTVLFGDNNPASSKPKFGTYWIKDGKVVGVFLEGGT…
					Glyma.16G073100.1	GmaMDAR3	478	Yes	Yes	No	5-24, 449-471	Yes	No	-	-	Class II (per mem)	MGRAFVYVILGGGVAAGYAALEFVKKGVSHGELCIISDEPVAPYERPALSKGFLLPEAAARLPSFHTCVGANEERLTPKWYKEHGIELVLGTGVKSTDVKRKTLLTTTGETISYKILIVATGARALKLEEFGVSGSDAENVCYLRHIADANRLVDVMQSCPGGNAVVIGGGYIGMECAASLVINKINVTMVFPEEHCMARLFTSKIANYYEEYYKSRGVNFIKGTVLSSFDFDSNGKVTAVNLRDGTTLSVDMVVVGIGIRPNTGLFEGQLTLEKGGIKVNGMLQSSNSSVYAIGDVAAFPVKAFGETRRLEHVDSARKSAIHVVSSIMEPNKTGEFDYIPFFYSRVFTLSWQFYGDNVGEVVYYGDMSGSAFGAYWVSKGHLVGAFLEGGTKEEYEAI…
					Glyma.19G061200.1	GmaMDAR4	478	Yes	Yes	No	5-24, 449-471	Yes	No	-	-	Class II (per mem)	MGRAFVYVILGGGVAAGYAALEFVKKGVSHGELCIISDEPVAPYERPALSKGFLLPEAAARLPSFHTCVGANEERLTSKWYKEHGIELVLGTGVKSADVKRKTLLTTTGETISYKILIVATGARALKLEEFGVTGSDAGNVCYLRDIADANRLVDVMQSCPGGNAVVIGGGYIGMECAASLVINKINVTMVFPEEHCMGRLFTSKIANYYEEYYKSRGVNFIKGTVLSSFDFDSNGKVTAVNLRDGSTLSVDMVVVGIGIRPNTGLFEGQLTLEKGGIKVNGMLQSSNSSVYAIGDVAAFPVKAVGETRRLEHVDSARKSARHVVSAIMEPNKTREFDYLPFFYSRIFTLSWQFYGDNVGEVVYYGDMSGSTFGAYWVSKDHLVGAFLEGGTKEEYEAI…
					Glyma.08G017800.1	GmaMDAR5	488	Yes	Yes	No	No	-	Yes	Chl (0.657)	mito: 7.5, chlo: 6, cyto_mito: 4.5	Class I (chl/mit)	MPSPSVRRLTMAAISNSLSLKHSFSLSRAPPSSSSIKFKFRRCYAAFANENREYVIVGGGNAAGYAARTFVEHGMADGRLCIVTKEPYAPYERPALTKAYLFPPDKKPARLPGFHTCVGSGGERQTPGWYKENGIEMLYEDPVKDIDIEKHTLTTSSGKLLKYGSLVIATGCTASRFPEKIGGNLPGVHYIRDVGDADALILSLEKAKKVVVVGGGYIGMEVAAAAVGWKLDTTIIFPEDHLLQRLFTPSLARRYEELYQKNGVKILKGASIKNLEAGSNGHVAAVKLGDGSLVEADTVIIGIGAKPAVTPFERVGLNTEVGGIQVDGQFRTSTPGIFAVGDVAAFPLKIYNRISRVEHVDHARRSAQHCVKALLSAQTHTYDYLPYFYSRIFEYEGSP…
					Glyma.05G211500.1	GmaMDAR6	422	Yes	Yes	No	No	-	Yes	SP (0.535)	chlo: 6, cyto: 3, mito: 2, vacu: 2	Class I (chl/mit)	MAAISNSLSLKHSFSLLLPLPSNSQDVRDAARTFVEHGMADGRLCIVTKEPYAPYERPALTRAYLFPPDKKPARLPGFHTCVGSGGERQTPEWYKENVIEMLYEDPVKDIDIEKHTLTTSSGKLLKYGSLIIATGCTASRFPEKIGGNLPGVHYIRHVADADTLILSLEKAKKVVVVRGGYIGMEVAAAAVGWKLDATIIFPEDDLLQRLFTPSLARRYEELYQKNGVKVLKVIIGIGARPAVSPFERVGQNTDVGGIQVDGQFRTSTPGIFAVGDVAAFPLKIYNRISRVEHVDHARRSAQHCVKALLSAQTHTYDYLPYFYSRIFEYEGSPRKVWWQFFRDKVGETVEIGNFDPKIATFWIESGKLKGVLLESGSPEEFQLLPKLARSQPLIDKAKL…

## Sheet: Table S3
	Table S3. Ascorbate redox states in Arabidopsis thaliana mutants lacking MDARs and/or DHARs under light stress conditions
	Genotype	Condition	Ascorbate redox state	SE	Figure
	No-0	HL 0h	93.9	1.319	4A
	mdar5-2	HL 0h	89.8	0.691	4A
	No-0	HL 24 h	93.5	0.411	4A
	mdar5-2	HL 24 h	94.2	0.958	4A
	No-0	HL 48 h	91	0.218	4A
	mdar5-2	HL 48 h	90.2	0.981	4A
	No-0	HL 72 h	89.7	4.305	4A
	mdar5-2	HL 72 h	92.2	1.749	4A
	No-0	FL 0h	93.3	1.169	4C
	mdar5-2	FL 0h	93.9	1.082	4C
	No-0	FL 24 h	93.9	0.599	4C
	mdar5-2	FL 24 h	95.1	1.821	4C
	No-0	FL 48 h	89.9	1.025	4C
	mdar5-2	FL 48 h	91.9	0.574	4C
	No-0	FL 72 h	90.9	0.971	4C
	mdar5-2	FL 72 h	94.7	4.466	4C
	Col-0	HL 0h	94.4	0.757	8A
	mdar1-1	HL 0h	93.7	0.91	8A
	mdar1-2	HL 0h	91.8	1.022	8A
	mdar4-5	HL 0h	92.6	1.427	8A
	mdar1-1 mdar4-5	HL 0h	94.4	0.693	8A
	Col-0	HL 24 h	96.2	0.265	8A
	mdar1-1	HL 24 h	88.4	6.415	8A
	mdar1-2	HL 24 h	90.6	4.103	8A
	mdar4-5	HL 24 h	95.1	0.593	8A
	mdar1-1 mdar4-5	HL 24 h	97	0.101	8A
	Col-0	HL 48 h	90.3	4.635	8A
	mdar1-1	HL 48 h	93	4.587	8A
	mdar1-2	HL 48 h	93.4	3.354	8A
	mdar4-5	HL 48 h	93.2	3.613	8A
	mdar1-1 mdar4-5	HL 48 h	96.9	0.731	8A
	Col-0	HL 72 h	92.2	3.899	8A
	mdar1-1	HL 72 h	95.1	2.294	8A
	mdar1-2	HL 72 h	90.9	5.645	8A
	mdar4-5	HL 72 h	96.2	0.736	8A
	mdar1-1 mdar4-5	HL 72 h	98.3	0.459	8A
	Col-0	FL 0h	93.3	0.936	8C
	mdar1-1	FL 0h	92.6	1.043	8C
	mdar1-2	FL 0h	92.8	0.791	8C
	mdar4-5	FL 0h	93.2	1.168	8C
	mdar1-1 mdar4-5	FL 0h	92.7	2.084	8C
	Col-0	FL 24 h	93.9	2.907	8C
	mdar1-1	FL 24 h	93.5	2.937	8C
	mdar1-2	FL 24 h	92.8	2.157	8C
	mdar4-5	FL 24 h	93.4	1.773	8C
	mdar1-1 mdar4-5	FL 24 h	92.9	1.48	8C
	Col-0	FL 48 h	92.8	0.669	8C
	mdar1-1	FL 48 h	91.5	0.694	8C
	mdar1-2	FL 48 h	93.4	0.743	8C
	mdar4-5	FL 48 h	90.4	1.883	8C
	mdar1-1 mdar4-5	FL 48 h	93.3	0.958	8C
	Col-0	FL 72 h	93.4	0.733	8C
	mdar1-1	FL 72 h	93.5	0.309	8C
	mdar1-2	FL 72 h	92.4	1.261	8C
	mdar4-5	FL 72 h	93	1.485	8C
	mdar1-1 mdar4-5	FL 72 h	93.6	1.292	8C
	Col-0	HL 0h	91	1.995	S11A
	mdar2-1	HL 0h	89.1	0.745	S11A
	mdar3-1	HL 0h	86.8	3.476	S11A
	mdar2-1 mdar3-1	HL 0h	88.1	1.465	S11A
	Col-0	HL 24 h	89.4	5.668	S11A
	mdar2-1	HL 24 h	90.2	7.048	S11A
	mdar3-1	HL 24 h	84	5.152	S11A
	mdar2-1 mdar3-1	HL 24 h	84.8	4.373	S11A
	Col-0	HL 48 h	94.7	2.076	S11A
	mdar2-1	HL 48 h	96.9	1.463	S11A
	mdar3-1	HL 48 h	95.1	2.62	S11A
	mdar2-1 mdar3-1	HL 48 h	95	1.729	S11A
	Col-0	HL 72 h	94.9	1.468	S11A
	mdar2-1	HL 72 h	95.9	1.723	S11A
	mdar3-1	HL 72 h	95.1	1.1	S11A
	mdar2-1 mdar3-1	HL 72 h	93.1	1.932	S11A
	Col-0	FL 0h	94.9	1.616	S11C
	mdar2-1	FL 0h	97.7	0.858	S11C
	mdar3-1	FL 0h	97.5	1.29	S11C
	mdar2-1 mdar3-1	FL 0h	96.6	1.057	S11C
	Col-0	FL 24 h	96	0.163	S11C
	mdar2-1	FL 24 h	95.4	2.012	S11C
	mdar3-1	FL 24 h	95.5	1.824	S11C
	mdar2-1 mdar3-1	FL 24 h	95.8	2.261	S11C
	Col-0	FL 48 h	97.1	0.754	S11C
	mdar2-1	FL 48 h	97	0.568	S11C
	mdar3-1	FL 48 h	96.4	0.145	S11C
	mdar2-1 mdar3-1	FL 48 h	97.3	0.584	S11C
	Col-0	FL 72 h	96.1	1.494	S11C
	mdar2-1	FL 72 h	94.4	1.923	S11C
	mdar3-1	FL 72 h	96.9	0.782	S11C
	mdar2-1 mdar3-1	FL 72 h	95.4	1.849	S11C
	Col-0	HL 0h	92.3	1.285	9A
	mdar2-1 mdar3-1	HL 0h	88	4.662	9A
	dhar1-1 dhar1-2	HL 0h	95.8	0.274	9A
	quadruple	HL 0h	93.8	1.599	9A
	Col-0	HL 24 h	93.8	0.235	9A
	mdar2-1 mdar3-1	HL 24 h	93	0.985	9A
	dhar1-1 dhar1-2	HL 24 h	93.8	0.768	9A
	quadruple	HL 24 h	92.7	1.086	9A
	Col-0	HL 48 h	96.4	1.632	9A
	mdar2-1 mdar3-1	HL 48 h	93.5	1.469	9A
	dhar1-1 dhar1-2	HL 48 h	95.2	0.914	9A
	quadruple	HL 48 h	92.7	3.069	9A
	Col-0	HL 72 h	94.1	1.834	9A
	mdar2-1 mdar3-1	HL 72 h	94.7	1.508	9A
	dhar1-1 dhar1-2	HL 72 h	95.4	1.06	9A
	quadruple	HL 72 h	96.3	0.503	9A
	Col-0	FL 0h	94.8	1.215	9C
	mdar2-1 mdar3-1	FL 0h	94.8	0.709	9C
	dhar1-1 dhar1-2	FL 0h	94.9	0.659	9C
	quadruple	FL 0h	93.7	1.298	9C
	Col-0	FL 24 h	95.3	1.533	9C
	mdar2-1 mdar3-1	FL 24 h	96	0.51	9C
	dhar1-1 dhar1-2	FL 24 h	95.3	0.272	9C
	quadruple	FL 24 h	96.3	0.655	9C
	Col-0	FL 48 h	95.3	1.006	9C
	mdar2-1 mdar3-1	FL 48 h	96.7	1.048	9C
	dhar1-1 dhar1-2	FL 48 h	96.5	1.125	9C
	quadruple	FL 48 h	95.8	1.689	9C
	Col-0	FL 72 h	96.9	0.914	9C
	mdar2-1 mdar3-1	FL 72 h	95.7	1.048	9C
	dhar1-1 dhar1-2	FL 72 h	95.2	0.979	9C
	quadruple	FL 72 h	95.2	1.235	9C
